# Supplementary material for: Introducing dibenzocyclooctatetraene into actinide chemistry: isolation of rare trivalent uranium sandwich complexes
Source: Royal Society of Chemistry journal article supplement (doi:10.1039/d4qi02102a), 2024-10-15
Supplement: d4qi02102a1.pdf [file d4qi02102a1.pdf]

## Supplementary Information

for

# **Introducing dibenzocyclooctatetraene into actinide chemistry: isolation of rare trivalent uranium sandwich complexes**

Ernesto Castellanos, Wei Su, and Selvan Demir\*

Department of Chemistry, Michigan State University, 578 South Shaw Lane,  
East Lansing, Michigan 48824, USA

\*Correspondence to: [sdemir@chemistry.msu.edu](mailto:sdemir@chemistry.msu.edu) (S.D.)

## Table of Contents

|          |                                                                                                                                                                                                                                                                            |            |
|----------|----------------------------------------------------------------------------------------------------------------------------------------------------------------------------------------------------------------------------------------------------------------------------|------------|
| <b>1</b> | <b>X-ray Crystallography</b>                                                                                                                                                                                                                                               | <b>S5</b>  |
|          | <b>Table S1.</b> Crystallographic data and structural refinements of [K(DME) <sub>2</sub> ][U(dbCOT) <sub>2</sub> ], <b>1</b> , [K(crypt-222)][U(dbCOT) <sub>2</sub> ], <b>2</b> , and [K(crypt-222)][U(dbCOT) <sub>2</sub> (THF)], <b>3</b> .                             | <b>S5</b>  |
|          | <b>Figure S1.</b> Structure of the [U(dbCOT) <sub>2</sub> ] <sup>-</sup> anion in [K(DME) <sub>2</sub> ][U(dbCOT) <sub>2</sub> ], <b>1</b> .                                                                                                                               | <b>S6</b>  |
|          | <b>Figure S2.</b> Structure of [K(crypt-222)][U(dbCOT) <sub>2</sub> ], <b>2</b> .                                                                                                                                                                                          | <b>S7</b>  |
|          | <b>Figure S3.</b> Structure of [K(crypt-222)][U(dbCOT) <sub>2</sub> ], <b>2</b> , with thermal ellipsoids.                                                                                                                                                                 | <b>S8</b>  |
|          | <b>Figure S4.</b> Structure of the [U(dbCOT) <sub>2</sub> ] <sup>-</sup> anion in [K(crypt-222)][U(dbCOT) <sub>2</sub> ], <b>2</b> .                                                                                                                                       | <b>S9</b>  |
|          | <b>Figure S5.</b> Space filling model of [K(crypt-222)][U(dbCOT) <sub>2</sub> ], <b>2</b> .                                                                                                                                                                                | <b>S10</b> |
|          | <b>Figure S6.</b> Depiction of the central COT ring planes in [K(crypt-222)][U(dbCOT) <sub>2</sub> ], <b>2</b> .                                                                                                                                                           | <b>S11</b> |
|          | <b>Figure S7.</b> Structure of [K(crypt-222)][U(dbCOT) <sub>2</sub> (THF)], <b>3</b> .                                                                                                                                                                                     | <b>S12</b> |
|          | <b>Figure S8.</b> Structure of the [U(dbCOT) <sub>2</sub> ] <sup>-</sup> anion in [K(crypt-222)][U(dbCOT) <sub>2</sub> (THF)], <b>3</b> .                                                                                                                                  | <b>S13</b> |
|          | <b>Figure S9.</b> Depiction of the central COT ring planes in [K(crypt-222)][U(dbCOT) <sub>2</sub> (THF)], <b>3</b> .                                                                                                                                                      | <b>S14</b> |
|          | <b>Table S2.</b> Metrical parameters for the C <sub>COT</sub> -C <sub>COT</sub> distances in [K(DME) <sub>2</sub> ][U(dbCOT) <sub>2</sub> ], <b>1</b> , [K(crypt-222)][U(dbCOT) <sub>2</sub> ], <b>2</b> , and [K(crypt-222)][U(dbCOT) <sub>2</sub> (THF)], <b>3</b> .     | <b>S15</b> |
|          | <b>Table S3.</b> Metrical parameters for the C <sub>benzo</sub> -C <sub>benzo</sub> distances in [K(DME) <sub>2</sub> ][U(dbCOT) <sub>2</sub> ], <b>1</b> , [K(crypt-222)][U(dbCOT) <sub>2</sub> ], <b>2</b> , and [K(crypt-222)][U(dbCOT) <sub>2</sub> (THF)], <b>3</b> . | <b>S16</b> |
|          | <b>Table S4.</b> Metrical parameters for the U-C distances and angles in [K(DME) <sub>2</sub> ][U(dbCOT) <sub>2</sub> ], <b>1</b> , [K(crypt-222)][U(dbCOT) <sub>2</sub> ], <b>2</b> , and [K(crypt-222)][U(dbCOT) <sub>2</sub> (THF)], <b>3</b> .                         | <b>S17</b> |
| <b>2</b> | <b>NMR Spectroscopy</b>                                                                                                                                                                                                                                                    | <b>S18</b> |
|          | <b>Figure S10.</b> <sup>1</sup> H NMR spectrum of [K(DME) <sub>2</sub> ][U(dbCOT) <sub>2</sub> ], <b>1</b> .                                                                                                                                                               | <b>S18</b> |
|          | <b>Figure S11.</b> <sup>1</sup> H- <sup>1</sup> H gCOSY spectrum of [K(DME) <sub>2</sub> ][U(dbCOT) <sub>2</sub> ], <b>1</b> .                                                                                                                                             | <b>S19</b> |
|          | <b>Figure S12.</b> Magnification of the <sup>1</sup> H- <sup>1</sup> H gCOSY spectrum of [K(DME) <sub>2</sub> ][U(dbCOT) <sub>2</sub> ], <b>1</b> .                                                                                                                        | <b>S20</b> |
|          | <b>Figure S13.</b> <sup>13</sup> C NMR spectrum of [K(DME) <sub>2</sub> ][U(dbCOT) <sub>2</sub> ], <b>1</b> .                                                                                                                                                              | <b>S21</b> |
|          | <b>Figure S14.</b> Magnification of the <sup>13</sup> C NMR spectrum of [K(DME) <sub>2</sub> ][U(dbCOT) <sub>2</sub> ], <b>1</b> .                                                                                                                                         | <b>S22</b> |
|          | <b>Figure S15.</b> <sup>1</sup> H- <sup>13</sup> C gHSQCAD spectrum of [K(DME) <sub>2</sub> ][U(dbCOT) <sub>2</sub> ], <b>1</b> .                                                                                                                                          | <b>S23</b> |
|          | <b>Figure S16.</b> Magnification of the <sup>1</sup> H- <sup>13</sup> C gHSQCAD spectrum of [K(DME) <sub>2</sub> ][U(dbCOT) <sub>2</sub> ], <b>1</b> .                                                                                                                     | <b>S24</b> |
|          | <b>Figure S17.</b> Magnification of the <sup>1</sup> H- <sup>13</sup> C gHSQCAD spectrum of [K(DME) <sub>2</sub> ][U(dbCOT) <sub>2</sub> ], <b>1</b> .                                                                                                                     | <b>S25</b> |
|          | <b>Figure S18.</b> <sup>1</sup> H NMR spectrum of [K(crypt-222)][U(dbCOT) <sub>2</sub> ], <b>2</b> .                                                                                                                                                                       | <b>S26</b> |
|          | <b>Figure S19.</b> <sup>1</sup> H- <sup>1</sup> H gCOSY spectrum of [K(crypt-222)][U(dbCOT) <sub>2</sub> ], <b>2</b> .                                                                                                                                                     | <b>S27</b> |

|                                                                                                                                                         |            |
|---------------------------------------------------------------------------------------------------------------------------------------------------------|------------|
| <b>Figure S20.</b> Magnification of the $^1\text{H}$ - $^1\text{H}$ gCOSY spectrum of [K(crypt-222)][U(dbCOT) <sub>2</sub> ], <b>2</b> .                | <b>S28</b> |
| <b>Figure S21.</b> $^{13}\text{C}$ NMR spectrum of [K(crypt-222)][U(dbCOT) <sub>2</sub> ], <b>2</b> .                                                   | <b>S29</b> |
| <b>Figure S22.</b> Magnification of the $^{13}\text{C}$ NMR spectrum of [K(crypt-222)][U(dbCOT) <sub>2</sub> ], <b>2</b> .                              | <b>S30</b> |
| <b>Figure S23.</b> $^1\text{H}$ - $^{13}\text{C}$ gHSQCAD spectrum of [K(crypt-222)][U(dbCOT) <sub>2</sub> ], <b>2</b> .                                | <b>S31</b> |
| <b>Figure S24.</b> Magnification of the $^1\text{H}$ - $^{13}\text{C}$ gHSQCAD spectrum of [K(crypt-222)][U(dbCOT) <sub>2</sub> ], <b>2</b> .           | <b>S32</b> |
| <b>Figure S25.</b> Magnification of the $^1\text{H}$ - $^{13}\text{C}$ gHSQCAD spectrum of [K(crypt-222)][U(dbCOT) <sub>2</sub> ], <b>2</b> .           | <b>S33</b> |
| <b>Figure S26.</b> $^1\text{H}$ NMR spectrum of [K(crypt-222)][U(dbCOT) <sub>2</sub> (THF)], <b>3</b> .                                                 | <b>S34</b> |
| <b>Figure S27.</b> $^1\text{H}$ - $^1\text{H}$ gCOSY spectrum of [K(crypt-222)][U(dbCOT) <sub>2</sub> (THF)], <b>3</b> .                                | <b>S35</b> |
| <b>Figure S28.</b> Magnification of the $^1\text{H}$ - $^1\text{H}$ gCOSY spectrum of [K(crypt-222)][U(dbCOT) <sub>2</sub> (THF)], <b>3</b> .           | <b>S36</b> |
| <b>Figure S29.</b> $^{13}\text{C}$ NMR spectrum of [K(crypt-222)][U(dbCOT) <sub>2</sub> (THF)], <b>3</b> .                                              | <b>S37</b> |
| <b>Figure S30.</b> Magnification of the $^{13}\text{C}$ NMR spectrum of [K(crypt-222)][U(dbCOT) <sub>2</sub> (THF)], <b>3</b> .                         | <b>S38</b> |
| <b>Figure S31.</b> $^1\text{H}$ - $^{13}\text{C}$ gHSQCAD spectrum of [K(crypt-222)][U(dbCOT) <sub>2</sub> (THF)], <b>3</b> .                           | <b>S39</b> |
| <b>Figure S32.</b> Magnification of the $^1\text{H}$ - $^{13}\text{C}$ gHSQCAD spectrum of [K(crypt-222)][U(dbCOT) <sub>2</sub> (THF)], <b>3</b> .      | <b>S40</b> |
| <b>Figure S33.</b> Magnification of the $^1\text{H}$ - $^{13}\text{C}$ gHSQCAD spectrum of [K(crypt-222)][U(dbCOT) <sub>2</sub> (THF)], <b>3</b> .      | <b>S41</b> |
| <b>Figure S34.</b> Variable-temperature $^1\text{H}$ NMR spectra of [K(DME) <sub>2</sub> ][U(dbCOT) <sub>2</sub> ], <b>1</b> , between 1 and 8 ppm.     | <b>S42</b> |
| <b>Figure S35.</b> Variable-temperature $^1\text{H}$ NMR spectra of [K(DME) <sub>2</sub> ][U(dbCOT) <sub>2</sub> ], <b>1</b> , between -30 and -50 ppm. | <b>S43</b> |
| <b>Figure S36.</b> Variable-temperature $^1\text{H}$ NMR spectra of [K(crypt-222)][U(dbCOT) <sub>2</sub> ], <b>2</b> , between 1 and 8 ppm.             | <b>S44</b> |
| <b>Figure S37.</b> Variable-temperature $^1\text{H}$ NMR spectra of [K(crypt-222)][U(dbCOT) <sub>2</sub> ], <b>2</b> , between -30 and -50 ppm.         | <b>S45</b> |
| <b>Figure S38.</b> Variable-temperature $^1\text{H}$ NMR spectra of [K(crypt-222)][U(dbCOT) <sub>2</sub> (THF)], <b>3</b> , between 1 and 8 ppm.        | <b>S46</b> |
| <b>Figure S39.</b> Variable-temperature $^1\text{H}$ NMR spectra of [K(crypt-222)][U(dbCOT) <sub>2</sub> (THF)], <b>3</b> , between -30 and -50 ppm.    | <b>S47</b> |
| <b>3 UV-Vis-NIR Spectroscopy</b>                                                                                                                        | <b>S48</b> |
| <b>Figure S40.</b> UV-Vis spectrum of [K(DME) <sub>2</sub> ][U(dbCOT) <sub>2</sub> ], <b>1</b> .                                                        | <b>S48</b> |
| <b>Figure S41.</b> UV-Vis spectra of [K(DME) <sub>2</sub> ][U(dbCOT) <sub>2</sub> ], <b>1</b> , over the course of six scans.                           | <b>S49</b> |
| <b>Figure S42.</b> Magnification of the UV-Vis spectra of [K(DME) <sub>2</sub> ][U(dbCOT) <sub>2</sub> ], <b>1</b> , over the course of six scans.      | <b>S50</b> |
| <b>Figure S43.</b> UV-Vis spectrum of [K(crypt-222)][U(dbCOT) <sub>2</sub> ], <b>2</b> .                                                                | <b>S51</b> |

|                                                                                                                                                                                                                                                                              |            |
|------------------------------------------------------------------------------------------------------------------------------------------------------------------------------------------------------------------------------------------------------------------------------|------------|
| <b>Figure S44.</b> UV-Vis spectra of [K(crypt-222)][U(dbCOT) <sub>2</sub> ], <b>2</b> , over the course of six scans.                                                                                                                                                        | <b>S52</b> |
| <b>Figure S45.</b> Magnification of the UV-Vis spectra of [K(crypt-222)][U(dbCOT) <sub>2</sub> ], <b>2</b> , over the course of six scans.                                                                                                                                   | <b>S53</b> |
| <b>Figure S46.</b> UV-Vis spectrum of [K(crypt-222)][U(dbCOT) <sub>2</sub> (THF)], <b>3</b> .                                                                                                                                                                                | <b>S54</b> |
| <b>Figure S47.</b> UV-Vis spectra of [K(crypt-222)][U(dbCOT) <sub>2</sub> (THF)], <b>3</b> , over the course of six scans.                                                                                                                                                   | <b>S55</b> |
| <b>Figure S48.</b> Magnification of the UV-Vis spectra of [K(crypt-222)][U(dbCOT) <sub>2</sub> (THF)], <b>3</b> , over the course of six scans.                                                                                                                              | <b>S56</b> |
| <b>Figure S49.</b> UV-Vis spectra of [K(DME) <sub>2</sub> ][U(dbCOT) <sub>2</sub> ], <b>1</b> , [K(crypt-222)][U(dbCOT) <sub>2</sub> ], <b>2</b> , and [K(crypt-222)][U(dbCOT) <sub>2</sub> (THF)], <b>3</b> .                                                               | <b>S57</b> |
| <b>Figure S50.</b> NIR spectrum of [K(DME) <sub>2</sub> ][U(dbCOT) <sub>2</sub> ], <b>1</b> .                                                                                                                                                                                | <b>S58</b> |
| <b>Figure S51.</b> NIR spectrum of [K(crypt-222)][U(dbCOT) <sub>2</sub> ], <b>2</b> .                                                                                                                                                                                        | <b>S59</b> |
| <b>Figure S52.</b> NIR spectrum of [K(crypt-222)][U(dbCOT) <sub>2</sub> (THF)], <b>3</b> .                                                                                                                                                                                   | <b>S60</b> |
| <b>Figure S53.</b> Magnification of the NIR spectra of [K(DME) <sub>2</sub> ][U(dbCOT) <sub>2</sub> ], <b>1</b> , [K(crypt-222)][U(dbCOT) <sub>2</sub> ], <b>2</b> , and [K(crypt-222)][U(dbCOT) <sub>2</sub> (THF)], <b>3</b> .                                             | <b>S61</b> |
| <b>4 IR Spectroscopy</b>                                                                                                                                                                                                                                                     | <b>S62</b> |
| <b>Figure S54.</b> FTIR Spectrum of [K(DME) <sub>2</sub> ][U(dbCOT) <sub>2</sub> ], <b>1</b> .                                                                                                                                                                               | <b>S62</b> |
| <b>Figure S55.</b> FTIR Spectrum of [K(crypt-222)][U(dbCOT) <sub>2</sub> ], <b>2</b> .                                                                                                                                                                                       | <b>S63</b> |
| <b>Figure S56.</b> FTIR Spectrum of [K(crypt-222)][U(dbCOT) <sub>2</sub> (THF)], <b>3</b> .                                                                                                                                                                                  | <b>S64</b> |
| <b>5 DFT Calculations</b>                                                                                                                                                                                                                                                    | <b>S65</b> |
| <b>Figure S57.</b> Calculated frontier orbital energies of [K(DME) <sub>2</sub> ][U(dbCOT) <sub>2</sub> ], <b>1</b> , [K(crypt-222)][U(dbCOT) <sub>2</sub> ], <b>2</b> , and [K(crypt-222)][U(dbCOT) <sub>2</sub> (THF)], <b>3</b> .                                         | <b>S65</b> |
| <b>Table S5.</b> Spin polarization difference in the calculated frontier orbital of [K(DME) <sub>2</sub> ][U(dbCOT) <sub>2</sub> ], <b>1</b> , [K(crypt-222)][U(dbCOT) <sub>2</sub> ], <b>2</b> , and [K(crypt-222)][U(dbCOT) <sub>2</sub> (THF)], <b>3</b> .                | <b>S66</b> |
| <b>Table S6.</b> Calculated percent contributions of natural bonding orbitals to canonical molecular orbitals of [K(DME) <sub>2</sub> ][U(dbCOT) <sub>2</sub> ], <b>1</b> .                                                                                                  | <b>S67</b> |
| <b>Table S7.</b> Calculated percent contributions of natural bonding orbitals to canonical molecular orbitals of [K(crypt-222)][U(dbCOT) <sub>2</sub> ], <b>2</b> .                                                                                                          | <b>S68</b> |
| <b>Table S8.</b> Calculated percent contributions of natural bonding orbitals to canonical molecular orbitals of [K(crypt-222)][U(dbCOT) <sub>2</sub> (THF)], <b>3</b> .                                                                                                     | <b>S69</b> |
| <b>Table S9.</b> Calculated percent contribution of atomic orbitals to natural bonding orbitals of [K(DME) <sub>2</sub> ][U(dbCOT) <sub>2</sub> ], <b>1</b> , [K(crypt-222)][U(dbCOT) <sub>2</sub> ], <b>2</b> , and [K(crypt-222)][U(dbCOT) <sub>2</sub> (THF)], <b>3</b> . | <b>S69</b> |

# 1 X-ray Crystallography

**Table S1.** Crystallographic data and structural refinements of [K(DME)<sub>2</sub>][U(dbCOT)<sub>2</sub>], **1**, [K(crypt-222)][U(dbCOT)<sub>2</sub>], **2**, and [K(crypt-222)][U(dbCOT)<sub>2</sub>(THF)], **3**.

|                                                       | <b>1</b>                                                                   | <b>2</b>                                                                   | <b>3</b>                                                                   |
|-------------------------------------------------------|----------------------------------------------------------------------------|----------------------------------------------------------------------------|----------------------------------------------------------------------------|
| Empirical formula                                     | C <sub>40</sub> H <sub>44</sub> KO <sub>4</sub> U                          | C <sub>50</sub> H <sub>60</sub> KN <sub>2</sub> O <sub>6</sub> U           | C <sub>54</sub> H <sub>68</sub> KN <sub>2</sub> O <sub>7</sub> U           |
| Formula weight                                        | 865.88                                                                     | 1062.13                                                                    | 1134.23                                                                    |
| Temperature/K                                         | 100.00(10)                                                                 | 100.01(10)                                                                 | 99.98(10)                                                                  |
| Crystal system                                        | monoclinic                                                                 | monoclinic                                                                 | monoclinic                                                                 |
| Space group                                           | <i>P</i> 2 <sub>1</sub> / <i>n</i>                                         | <i>P</i> 2 <sub>1</sub> / <i>n</i>                                         | <i>P</i> 2 <sub>1</sub> / <i>c</i>                                         |
| <i>a</i> /Å                                           | 10.50500(10)                                                               | 13.17900(10)                                                               | 18.39050(10)                                                               |
| <i>b</i> /Å                                           | 22.4291(2)                                                                 | 19.76760(10)                                                               | 10.59960(10)                                                               |
| <i>c</i> /Å                                           | 14.54230(10)                                                               | 18.17180(10)                                                               | 26.3529(2)                                                                 |
| $\alpha$ /°                                           | 90                                                                         | 90                                                                         | 90                                                                         |
| $\beta$ /°                                            | 92.7560(10)                                                                | 105.9300(10)                                                               | 108.9470(10)                                                               |
| $\gamma$ /°                                           | 90                                                                         | 90                                                                         | 90                                                                         |
| Volume/Å <sup>3</sup>                                 | 3422.46(5)                                                                 | 4552.27(5)                                                                 | 4858.69(7)                                                                 |
| Z                                                     | 4                                                                          | 4                                                                          | 4                                                                          |
| $\rho_{calc}$ /cm <sup>3</sup>                        | 1.680                                                                      | 1.550                                                                      | 1.551                                                                      |
| $\mu$ /mm <sup>-1</sup>                               | 14.754                                                                     | 11.256                                                                     | 10.601                                                                     |
| F(000)                                                | 1708.0                                                                     | 2132.0                                                                     | 2292.0                                                                     |
| Crystal size/mm <sup>3</sup>                          | 0.11 × 0.08 ×<br>0.06                                                      | 0.156 × 0.06 ×<br>0.055                                                    | 0.25 × 0.08 ×<br>0.08                                                      |
| Radiation                                             | Cu K $\alpha$ ( $\lambda$ =<br>1.54184)                                    | Cu K $\alpha$ ( $\lambda$ =<br>1.54184)                                    | Cu K $\alpha$ ( $\lambda$ =<br>1.54184)                                    |
| 2 $\theta$ range for data collection/°                | 7.25 to 160.67                                                             | 6.752 to 160.692                                                           | 5.08 to 160.924                                                            |
| Index ranges                                          | -13 ≤ <i>h</i> ≤ 13, -<br>28 ≤ <i>k</i> ≤ 21, -18<br>≤ <i>l</i> ≤ 18       | -16 ≤ <i>h</i> ≤ 14, -25<br>≤ <i>k</i> ≤ 25, -23 ≤ <i>l</i><br>≤ 23        | -22 ≤ <i>h</i> ≤ 23, -12<br>≤ <i>k</i> ≤ 13, -33 ≤ <i>l</i><br>≤ 30        |
| Reflections collected                                 | 36784                                                                      | 95067                                                                      | 53270                                                                      |
| Independent reflections                               | 7388                                                                       | 9910                                                                       | 10454                                                                      |
|                                                       | [ <i>R</i> <sub>int</sub> = 0.0309,<br><i>R</i> <sub>sigma</sub> = 0.0217] | [ <i>R</i> <sub>int</sub> = 0.0431,<br><i>R</i> <sub>sigma</sub> = 0.0202] | [ <i>R</i> <sub>int</sub> = 0.0434,<br><i>R</i> <sub>sigma</sub> = 0.0297] |
| Data/restraints/parameters                            | 7388/0/464                                                                 | 9910/0/589                                                                 | 10454/0/618                                                                |
| Goodness-of-fit on F <sup>2</sup>                     | 1.098                                                                      | 1.169                                                                      | 1.137                                                                      |
| Final R indexes [ <i>I</i> ≥ 2 $\sigma$ ( <i>I</i> )] | <i>R</i> <sub>1</sub> = 0.0329,<br><i>wR</i> <sub>2</sub> = 0.0884         | <i>R</i> <sub>1</sub> = 0.0216,<br><i>wR</i> <sub>2</sub> = 0.0562         | <i>R</i> <sub>1</sub> = 0.0248,<br><i>wR</i> <sub>2</sub> = 0.0625         |
| Final R indexes [all data]                            | <i>R</i> <sub>1</sub> = 0.0375,<br><i>wR</i> <sub>2</sub> = 0.0911         | <i>R</i> <sub>1</sub> = 0.0233,<br><i>wR</i> <sub>2</sub> = 0.0569         | <i>R</i> <sub>1</sub> = 0.0275,<br><i>wR</i> <sub>2</sub> = 0.0641         |
| Largest diff. peak/hole /<br>e Å <sup>-3</sup>        | 1.54/-1.69                                                                 | 0.76/-1.24                                                                 | 1.22/-1.23                                                                 |

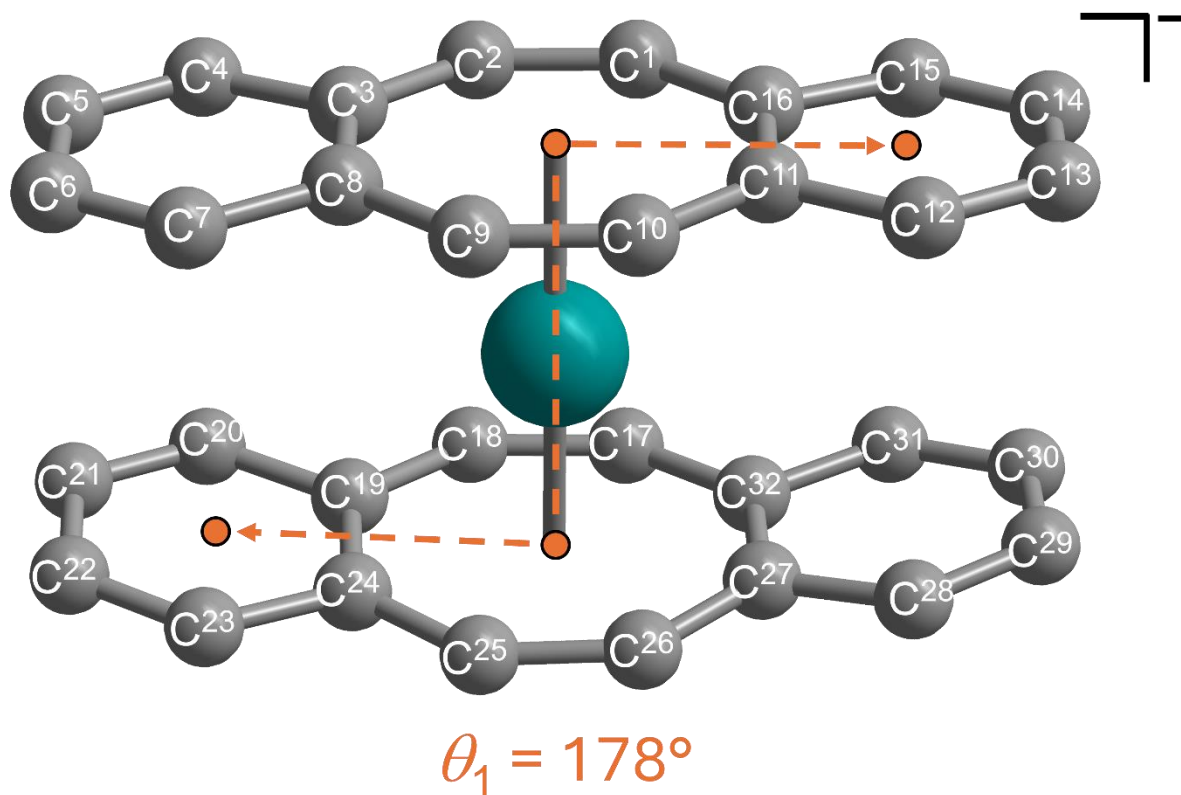

**Figure S1.** Structure of the  $[\text{U}(\text{dbCOT})_2]^-$  anion in a crystal of  $[\text{K}(\text{DME})_2][\text{U}(\text{dbCOT})_2]$ , **1**, with corresponding atom labels. The dihedral angles ( $\theta_1 = 178^\circ$  and  $\theta_2 = 2^\circ$ ) were calculated using the benzo- and COT ring centroids. Teal and grey spheres represent U and C atoms, respectively. H atoms and the coordinating  $[\text{K}(\text{DME})_2]^+$  counteranion are omitted for clarity.

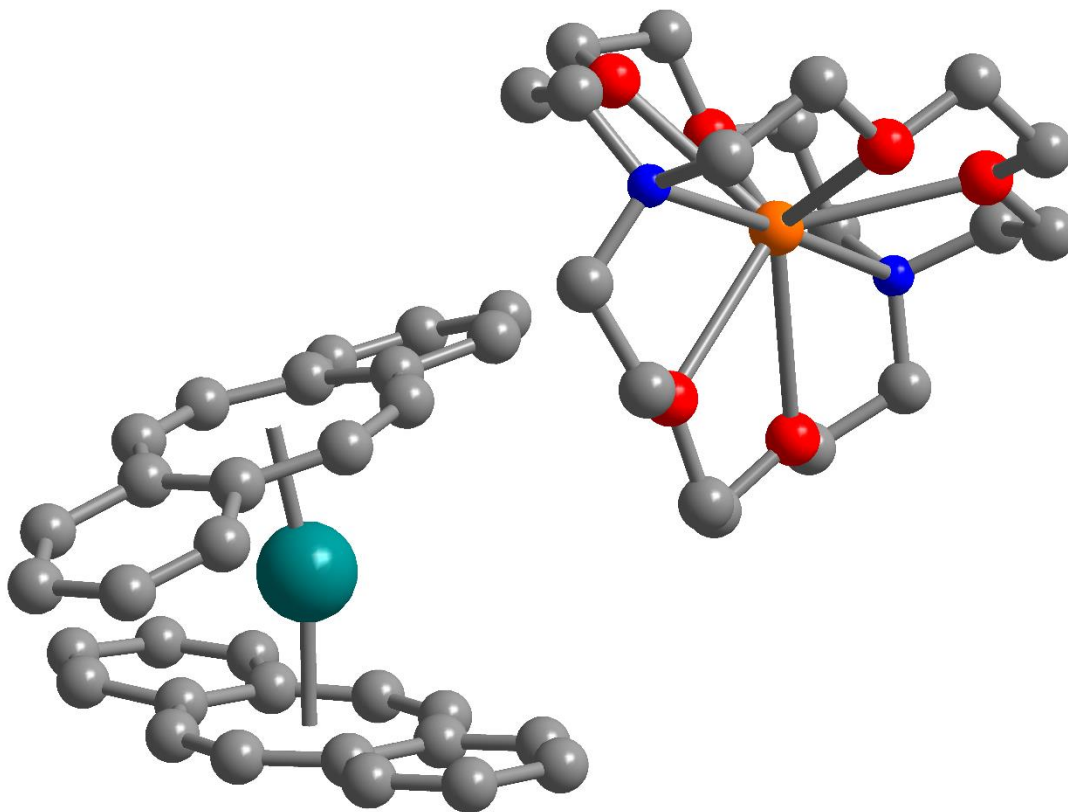

**Figure S2.** Structure of  $[\text{K}(\text{crypt-222})][\text{U}(\text{dbCOT})_2]$ , **2**. Teal, orange, red, blue, and grey spheres represent U, K, O, N, and C atoms, respectively. H atoms are omitted for clarity.

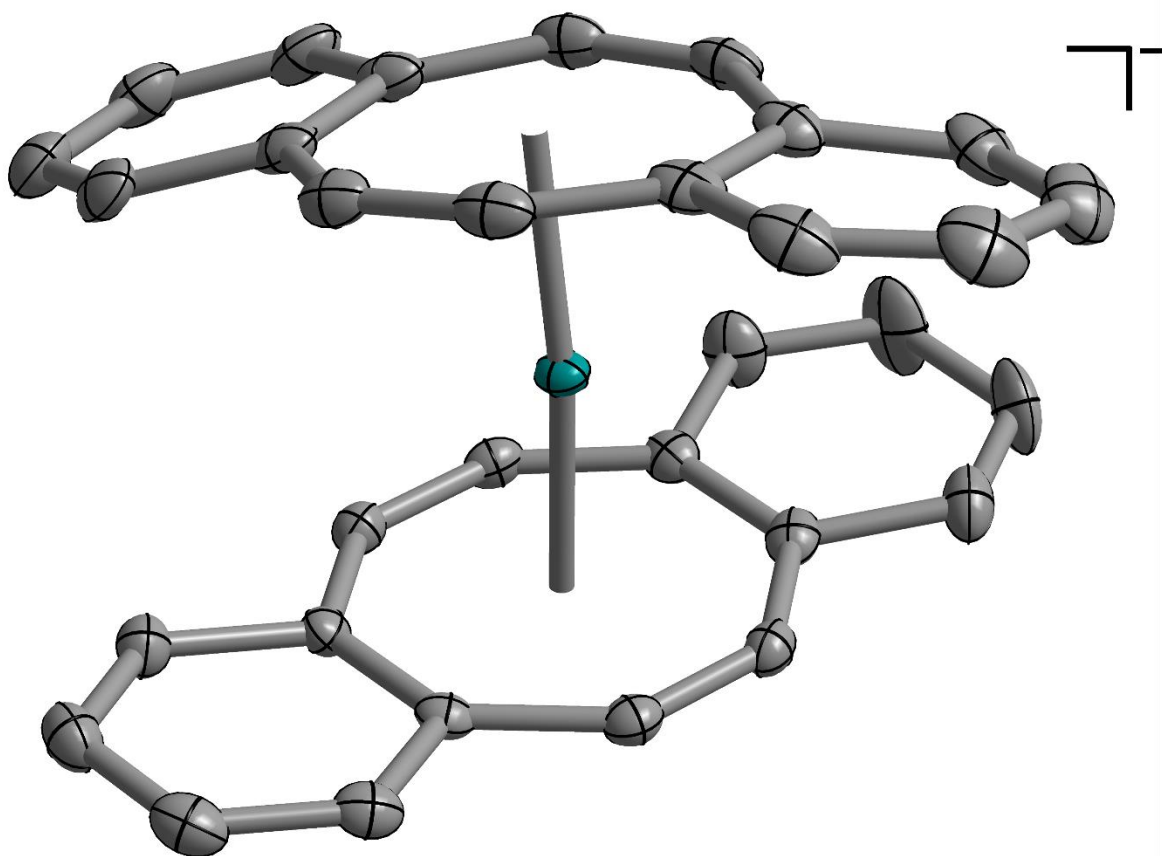

**Figure S3.** Structure of the  $[\text{U}(\text{dbCOT})_2]^-$  anion in a crystal of  $[\text{K}(\text{crypt-222})][\text{U}(\text{dbCOT})_2]$ , **2**, with thermal ellipsoids drawn at the 50% probability level. Teal and grey ellipsoids represent U and C atoms, respectively. H atoms and the  $[\text{K}(\text{crypt-222})]^+$  counteranion are omitted for clarity.



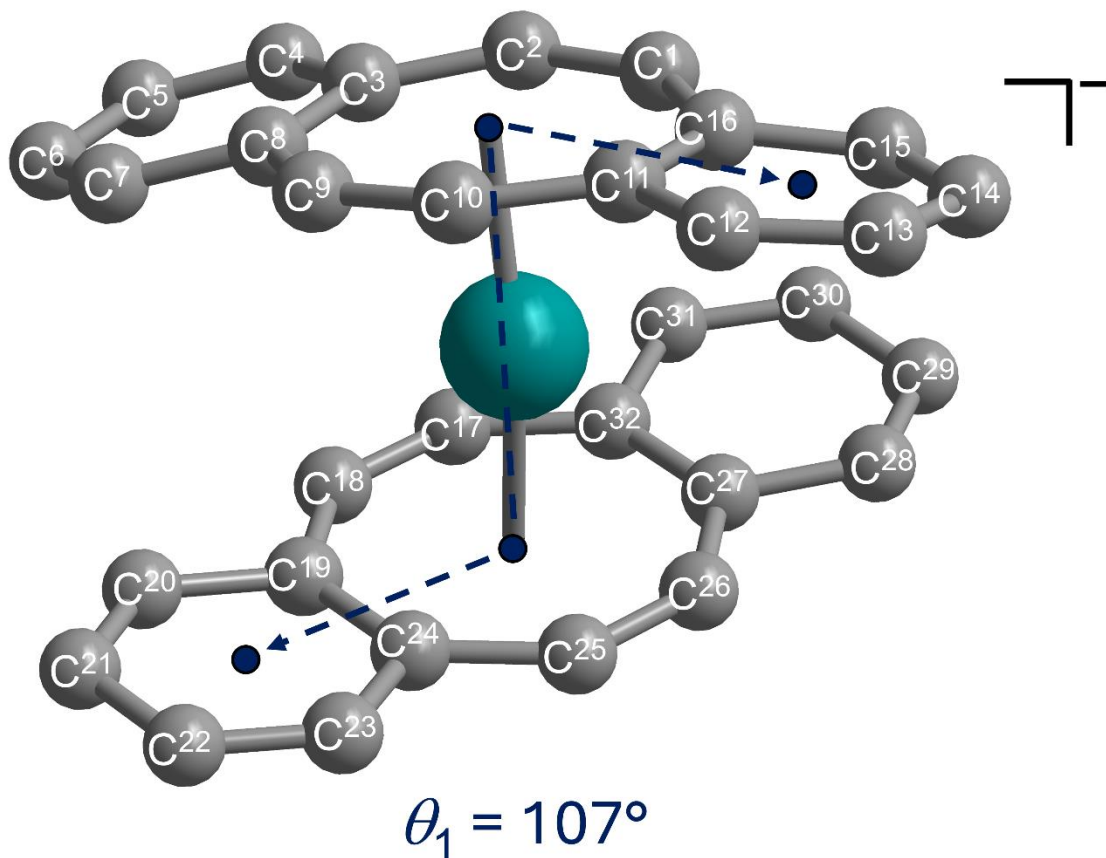

**Figure S4.** Structure of the  $[\text{U}(\text{dbCOT})_2]^{2-}$  anion in a crystal of  $[\text{K}(\text{crypt-222})][\text{U}(\text{dbCOT})_2]$ , **2**, in a crystal of  $[\text{K}(\text{crypt-222})][\text{U}(\text{dbCOT})_2]$ , with corresponding atom labels. Teal and grey spheres represent U and C atoms, respectively. H atoms and the  $[\text{K}(\text{crypt-222})]^+$  counteranion are omitted for clarity.

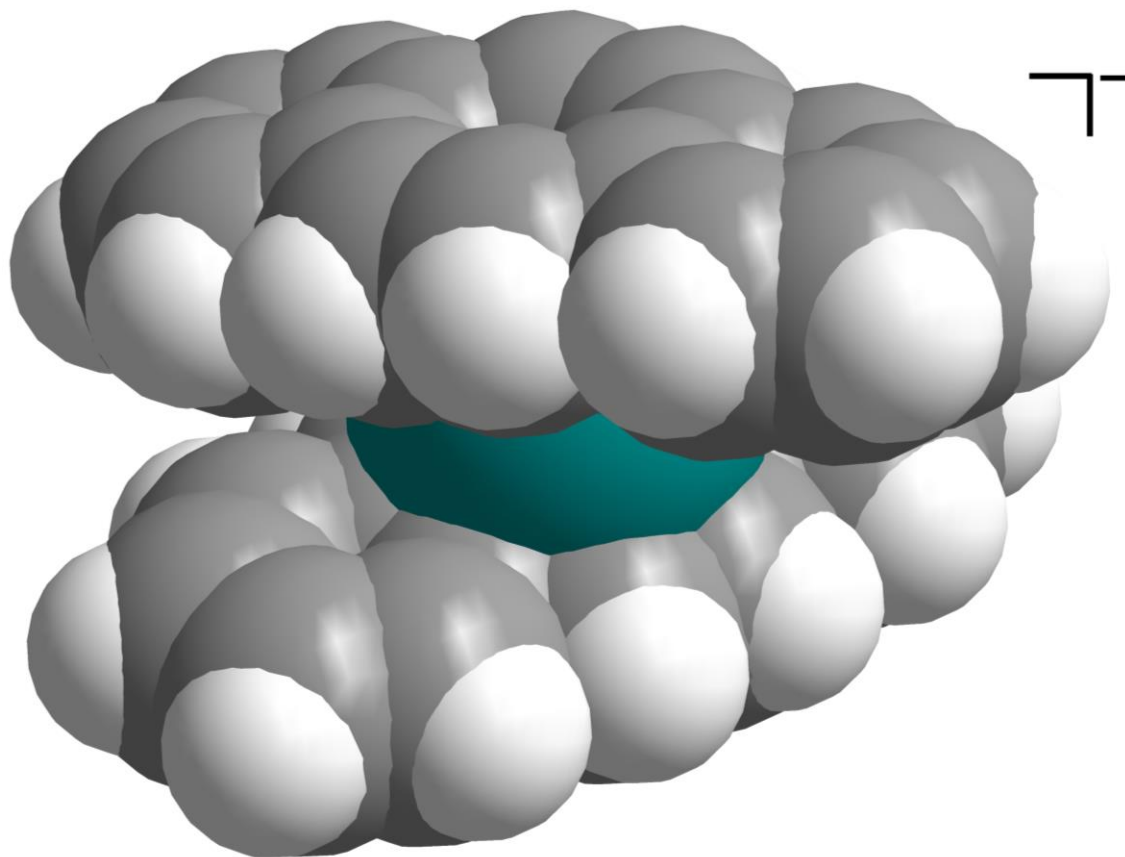

**Figure S5.** Space filling model of the  $[\text{U}(\text{dbCOT})_2]^-$  anion in a crystal of  $[\text{K}(\text{crypt-222})][\text{U}(\text{dbCOT})_2]$ , **2**. Teal, grey, and white-grey spheres represent U, C, and H atoms, respectively. The  $[\text{K}(\text{crypt-222})]^+$  counteranion is omitted for clarity.

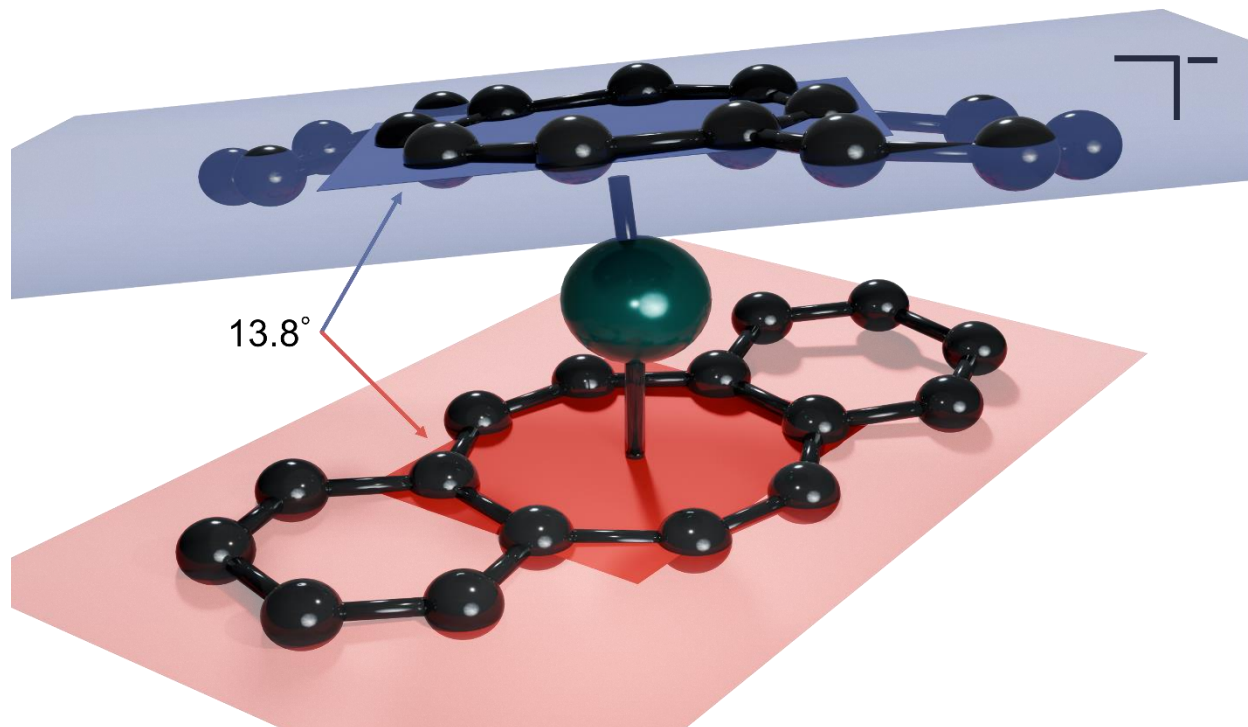

**Figure S6.** Structure of the  $[\text{U}(\text{dbCOT})_2]^-$  anion in a crystal of  $[\text{K}(\text{crypt-222})][\text{U}(\text{dbCOT})_2]$ , **2**, with planes bisecting the central COT rings of each  $\text{dbCOT}^{2-}$  ligand, where the angle between planes is  $13.8^\circ$ . Teal and black spheres represent U and C atoms, respectively. H atoms and the  $[\text{K}(\text{crypt-222})]^+$  counteranion are omitted for clarity.

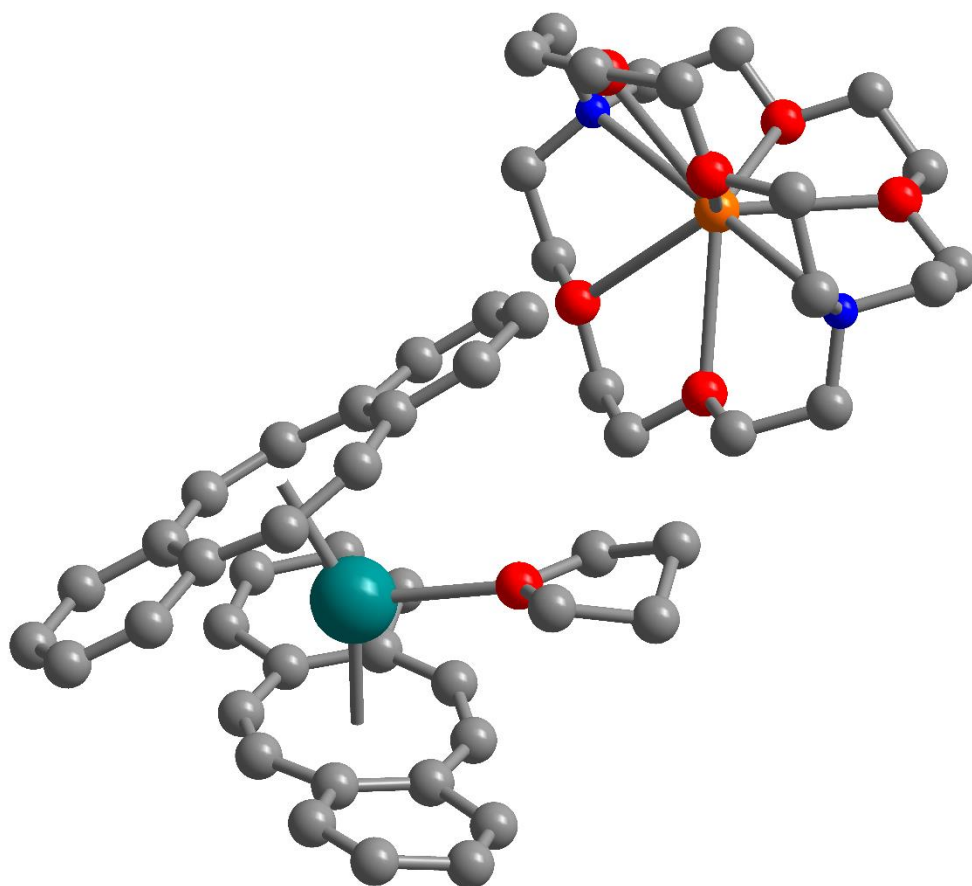

**Figure S7.** Structure of  $[K(\text{crypt-222})][U(\text{dbCOT})_2(\text{THF})]$ , **3**. Teal, orange, red, blue, and grey spheres represent U, K, O, N, and C atoms, respectively. H atoms are omitted for clarity.

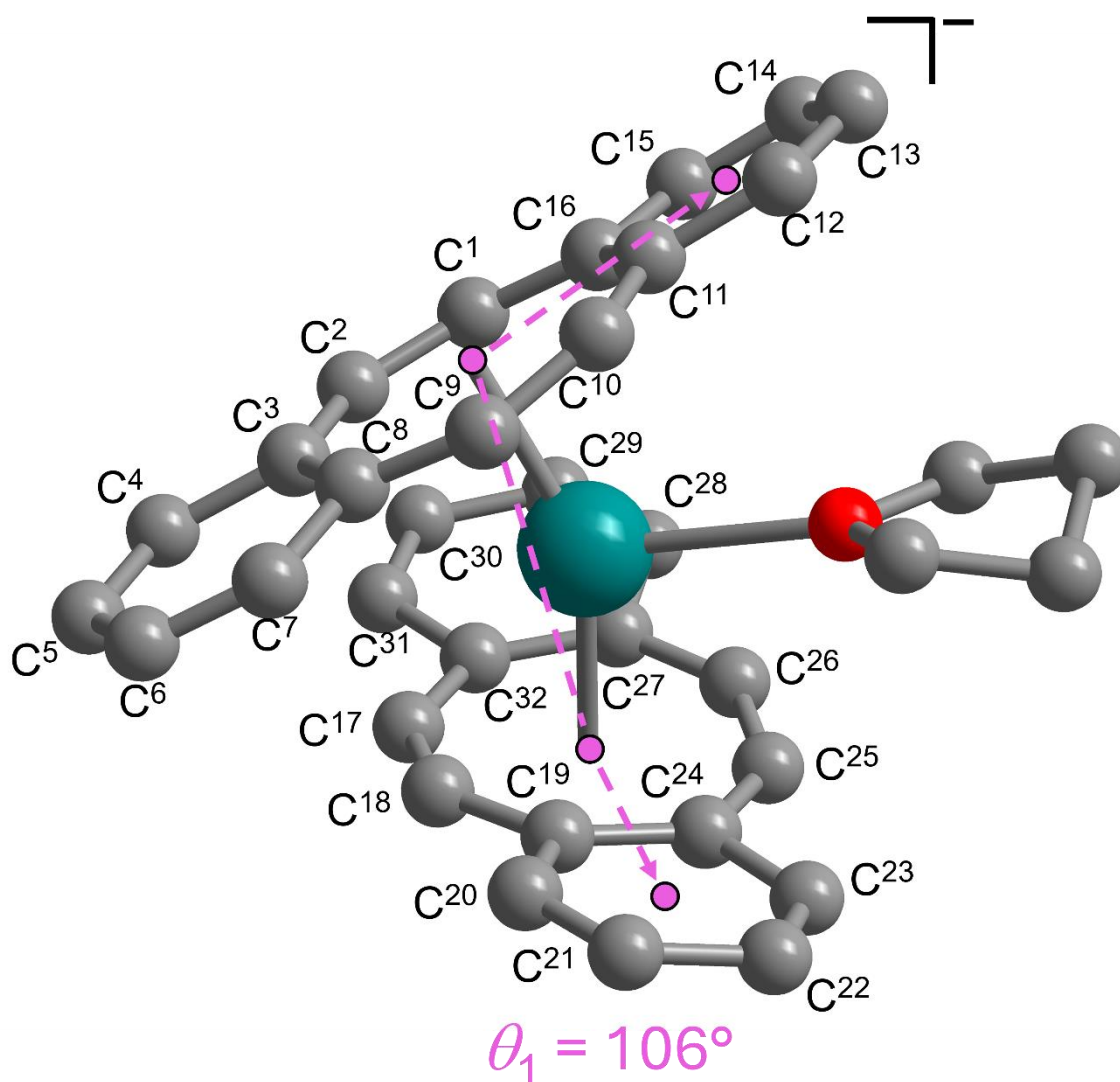

**Figure S8.** Structure of the  $[\text{U}(\text{dbCOT})_2(\text{THF})]^-$  anion in a crystal of  $[\text{K}(\text{crypt-222})][\text{U}(\text{dbCOT})_2(\text{THF})]$ , **3**, with corresponding atom labels. The dihedral angles ( $\theta_1 = 106^\circ$  and  $\theta_2 = 74^\circ$ ) were calculated using the benzo and COT ring centroids. Teal, red, and grey spheres represent U, O, and C atoms, respectively. H atoms and the  $[\text{K}(\text{crypt-222})]^+$  counteranion are omitted for clarity.

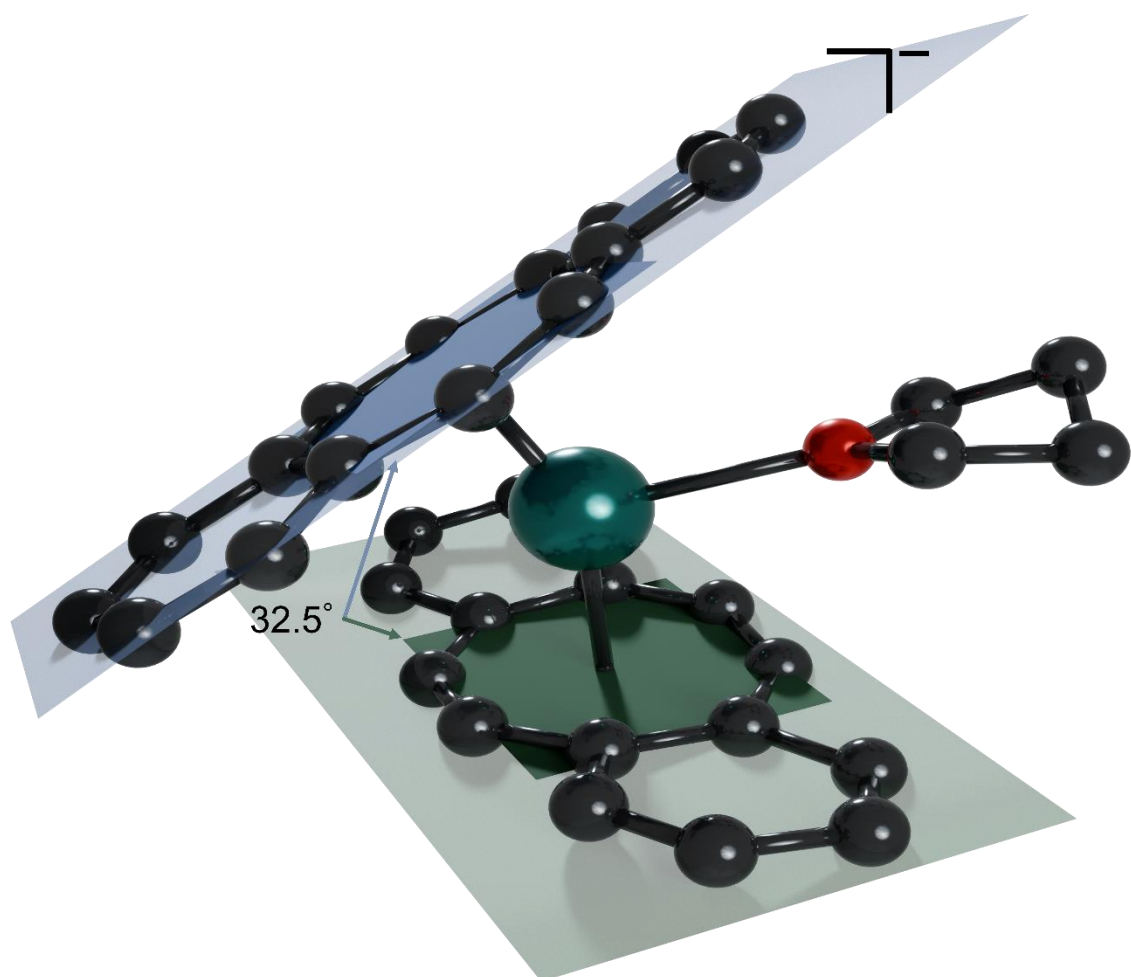

**Figure S9.** Structure of the  $[\text{U}(\text{dbCOT})_2(\text{THF})]^-$  anion in a crystal of  $[\text{K}(\text{crypt-222})][\text{U}(\text{dbCOT})_2(\text{THF})]$ , **3**, with planes bisecting the central COT rings of each  $\text{dbCOT}^{2-}$  ligand, where the angle between planes is  $32.5^\circ$ . Teal, red, and black spheres represent U, O, and C atoms, respectively. H atoms and the  $[\text{K}(\text{crypt-222})]^+$  counteranion are omitted for clarity.

**Table S2.** Metrical parameters for the C–C distances of the cyclooctatetraenyl (COT) moieties in [K(DME)<sub>2</sub>][U(dbCOT)<sub>2</sub>], **1**, [K(crypt-222)][U(dbCOT)<sub>2</sub>], **2**, and [K(crypt-222)][U(dbCOT)<sub>2</sub>(THF)], **3**. Atom labels for **1**, **2**, and **3** correspond to those given in Figures S1, S4, and S8, respectively.

| C <sub>COT</sub> –C <sub>COT</sub> Distances (Å) |          |          |          |
|--------------------------------------------------|----------|----------|----------|
|                                                  | <b>1</b> | <b>2</b> | <b>3</b> |
| C1–C2                                            | 1.416(6) | 1.407(4) | 1.412(5) |
| C2–C3                                            | 1.437(6) | 1.432(4) | 1.422(5) |
| C3–C8                                            | 1.455(6) | 1.454(4) | 1.457(5) |
| C8–C9                                            | 1.437(6) | 1.436(4) | 1.419(4) |
| C9–C10                                           | 1.409(6) | 1.419(4) | 1.419(5) |
| C10–C11                                          | 1.431(6) | 1.430(4) | 1.423(5) |
| C11–C16                                          | 1.453(6) | 1.457(4) | 1.454(5) |
| C16–C1                                           | 1.432(6) | 1.432(5) | 1.426(4) |
| C17–C18                                          | 1.415(6) | 1.409(3) | 1.415(5) |
| C18–C19                                          | 1.434(6) | 1.432(4) | 1.426(5) |
| C19–C24                                          | 1.452(6) | 1.453(4) | 1.449(5) |
| C24–C25                                          | 1.431(6) | 1.430(3) | 1.421(5) |
| C25–C26                                          | 1.413(6) | 1.421(3) | 1.415(5) |
| C26–C27                                          | 1.431(6) | 1.426(4) | 1.422(5) |
| C27–C32                                          | 1.456(6) | 1.449(4) | 1.450(4) |
| C32–C17                                          | 1.432(6) | 1.429(3) | 1.424(5) |

COT = cyclooctatetraenyl rings of the dbCOT<sup>2-</sup> ligands in **1**.

**Table S3.** Metrical parameters for the C–C distances of the benzo moieties of [K(DME)<sub>2</sub>][U(dbCOT)<sub>2</sub>], **1**, [K(crypt-222)][U(dbCOT)<sub>2</sub>], **2**, and [K(crypt-222)][U(dbCOT)<sub>2</sub>(THF)], **3**. Atom labels for **1**, **2**, and **3** correspond to those given in Figures S1, S4, and S8, respectively.

| C <sub>benzo</sub> –C <sub>benzo</sub> Distances (Å) |          |          |          |
|------------------------------------------------------|----------|----------|----------|
|                                                      | <b>1</b> | <b>2</b> | <b>3</b> |
| C3–C4                                                | 1.450(6) | 1.443(5) | 1.443(4) |
| C4–C5                                                | 1.352(6) | 1.353(5) | 1.357(4) |
| C5–C6                                                | 1.414(6) | 1.426(5) | 1.413(7) |
| C6–C7                                                | 1.356(7) | 1.349(5) | 1.354(5) |
| C7–C8                                                | 1.446(6) | 1.449(4) | 1.442(5) |
| C8–C3                                                | 1.455(6) | 1.454(4) | 1.457(5) |
| C11–C12                                              | 1.442(6) | 1.454(5) | 1.442(4) |
| C12–C13                                              | 1.352(6) | 1.350(5) | 1.365(6) |
| C13–C14                                              | 1.413(6) | 1.420(5) | 1.409(7) |
| C14–C15                                              | 1.353(6) | 1.351(5) | 1.366(5) |
| C15–C16                                              | 1.448(6) | 1.444(4) | 1.441(5) |
| C16–C11                                              | 1.453(6) | 1.457(4) | 1.454(5) |
| C3'–C4'                                              | 1.439(6) | 1.437(4) | 1.444(5) |
| C4'–C5'                                              | 1.358(6) | 1.354(4) | 1.352(5) |
| C5'–C6'                                              | 1.419(7) | 1.426(5) | 1.427(6) |
| C6'–C7'                                              | 1.359(6) | 1.350(4) | 1.351(6) |
| C7'–C8'                                              | 1.452(6) | 1.443(4) | 1.448(5) |
| C8'–C3'                                              | 1.451(6) | 1.453(4) | 1.449(5) |
| C11'–C12'                                            | 1.440(6) | 1.449(4) | 1.442(5) |
| C12'–C13'                                            | 1.352(6) | 1.343(4) | 1.360(5) |
| C13'–C14'                                            | 1.416(6) | 1.417(6) | 1.418(5) |
| C14'–C15'                                            | 1.348(6) | 1.352(4) | 1.362(6) |
| C15'–C16'                                            | 1.446(6) | 1.441(4) | 1.445(5) |
| C16'–C11'                                            | 1.456(6) | 1.450(4) | 1.450(4) |



**Table S4.** Metrical parameters for the U–C distances and angles in the crystal structure of [K(DME)<sub>2</sub>][U(dbCOT)<sub>2</sub>], **1**. Atom labels for **1**, **2**, and **3** correspond to those given in Figures S1, S4, and S8, respectively.

| U–C <sub>COT</sub> Distances (Å) |          |          |          |
|----------------------------------|----------|----------|----------|
|                                  | <b>1</b> | <b>2</b> | <b>3</b> |
| U–C1                             | 2.716(4) | 2.691(3) | 2.723(4) |
| U–C2                             | 2.707(4) | 2.715(3) | 2.786(4) |
| U–C3                             | 2.823(4) | 2.769(3) | 2.908(3) |
| U–C8                             | 2.825(4) | 2.746(3) | 2.859(3) |
| U–C9                             | 2.732(4) | 2.690(3) | 2.734(3) |
| U–C10                            | 2.737(4) | 2.732(3) | 2.814(3) |
| U–C11                            | 2.856(4) | 2.803(3) | 2.939(3) |
| U–C16                            | 2.835(4) | 2.751(3) | 2.855(4) |
| U–C17                            | 2.723(4) | 2.696(3) | 2.759(3) |
| U–C18                            | 2.707(4) | 2.692(3) | 2.692(3) |
| U–C19                            | 2.771(4) | 2.783(3) | 2.802(3) |
| U–C24                            | 2.782(4) | 2.783(2) | 2.920(4) |
| U–C25                            | 2.716(4) | 2.717(3) | 2.864(3) |
| U–C26'                           | 2.698(4) | 2.714(3) | 2.773(3) |
| U–C27'                           | 2.745(4) | 2.775(3) | 2.812(3) |
| U–C32'                           | 2.782(4) | 2.765(3) | 2.850(3) |
| Cnt Distances (Å)                |          |          |          |
| U–Cnt <sup>1</sup>               | 2.004    | 2.000    | 2.106    |
| U–Cnt <sup>2</sup>               | 2.055    | 2.003    | 2.128    |
| Cnt Angles (°)                   |          |          |          |
| Cnt–U–Cnt                        | 177.1    | 167.2    | 150.4    |
| Cnt–U–Cnt–K                      | 19.0     | 154.3    | 126.9    |
| $\theta_1$                       | 177.7    | 107.1    | 106.1    |
| $\theta_2$                       | 2.3      | 72.9     | 73.9     |

COT = cyclooctatetraenyl rings of the dbCOT<sup>2-</sup> ligands in **1**. Cnt = COT ring centroid. The dihedral angles ( $\theta_1 = 177.7^\circ$  and  $\theta_2 = 2.3^\circ$ ) were calculated using the benzo and COT ring centroids (see Figure S1, S4, and S8).

## 2 NMR Spectroscopy

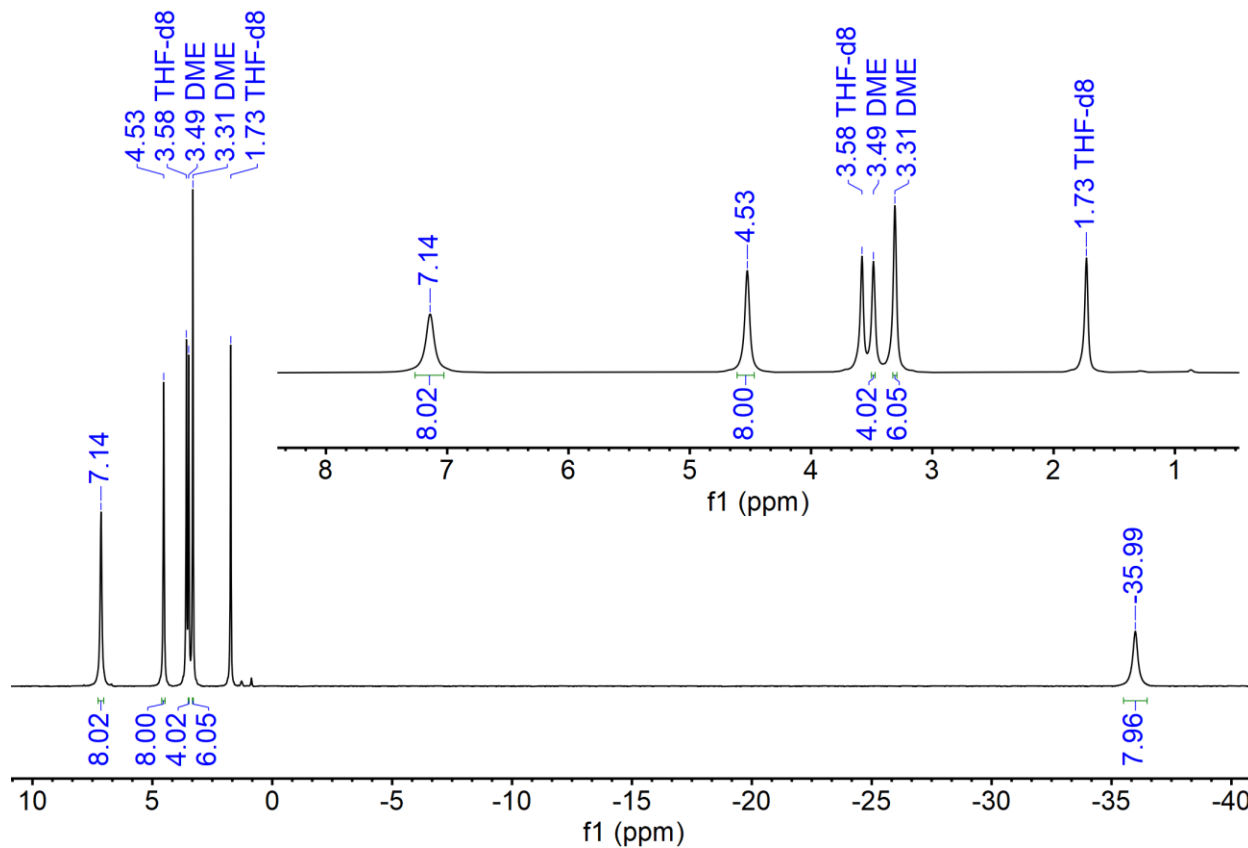

**Figure S10.**  $^1\text{H}$  NMR spectrum of  $[\text{K}(\text{DME})_2][\text{U}(\text{dbCOT})_2]$ , **1**, (500 MHz,  $\text{THF-d}_8$ , 25  $^\circ\text{C}$ ):  $\delta$  7.14 (br s, 8 H,  $\text{COT}(\text{CH}(\text{CH}_2\text{CH}_2)_2)$ ), 4.53 (br s, 8 H,  $\text{COT}(\text{CH}(\text{CH}_2\text{CH}_2)_2)$ ), 3.49 (s, 4 H,  $\text{H}_3\text{CO}(\text{CH}_2)_2\text{OCH}_3$ ), 3.49 (s, 6 H,  $\text{H}_3\text{CO}(\text{CH}_2)_2\text{OCH}_3$ ), -35.99 (br s, 8 H ( $\text{COT}-\text{H}$ )).

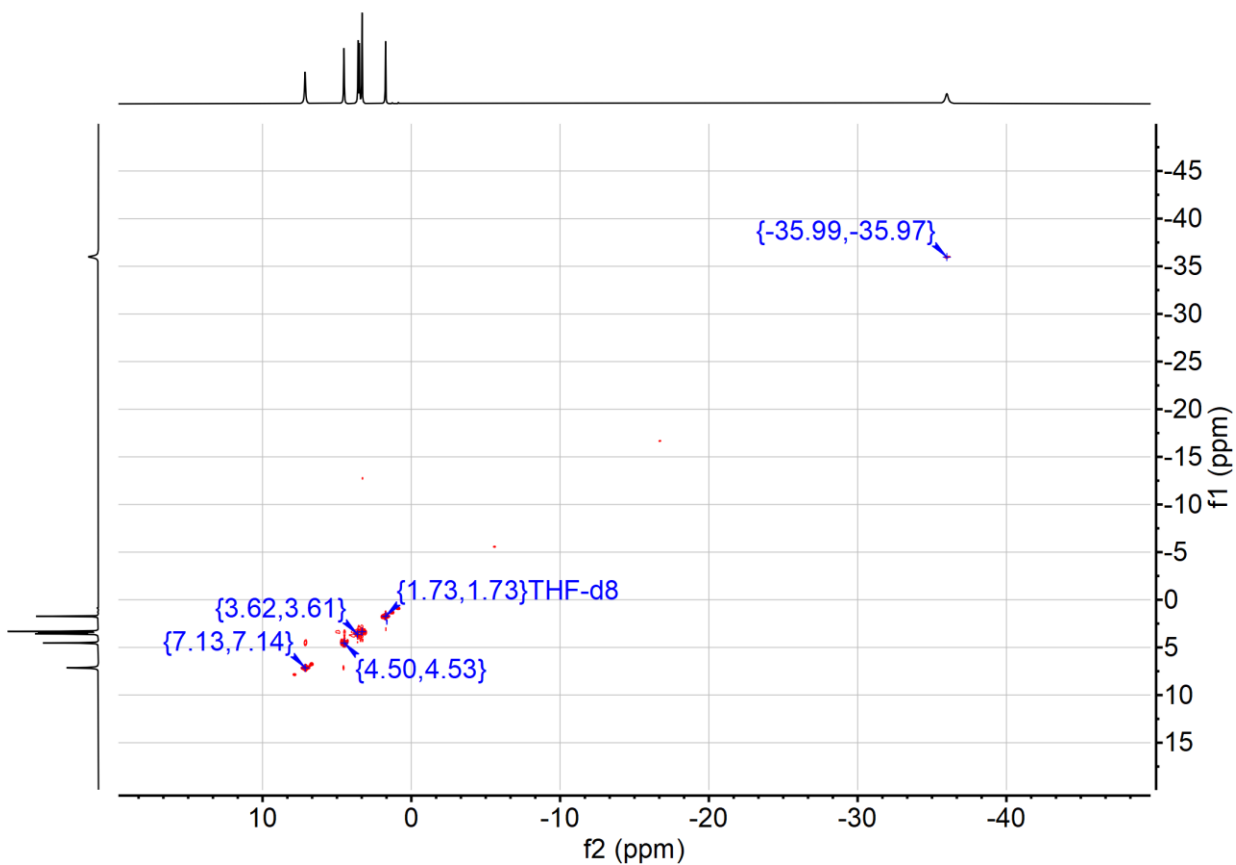

**Figure S11.**  $^1\text{H}$ - $^1\text{H}$  gCOSY spectrum of  $[\text{K}(\text{DME})_2][\text{U}(\text{dbCOT})_2]$ , **1**, (500 MHz, THF- $d_8$ , 25  $^\circ\text{C}$ ).

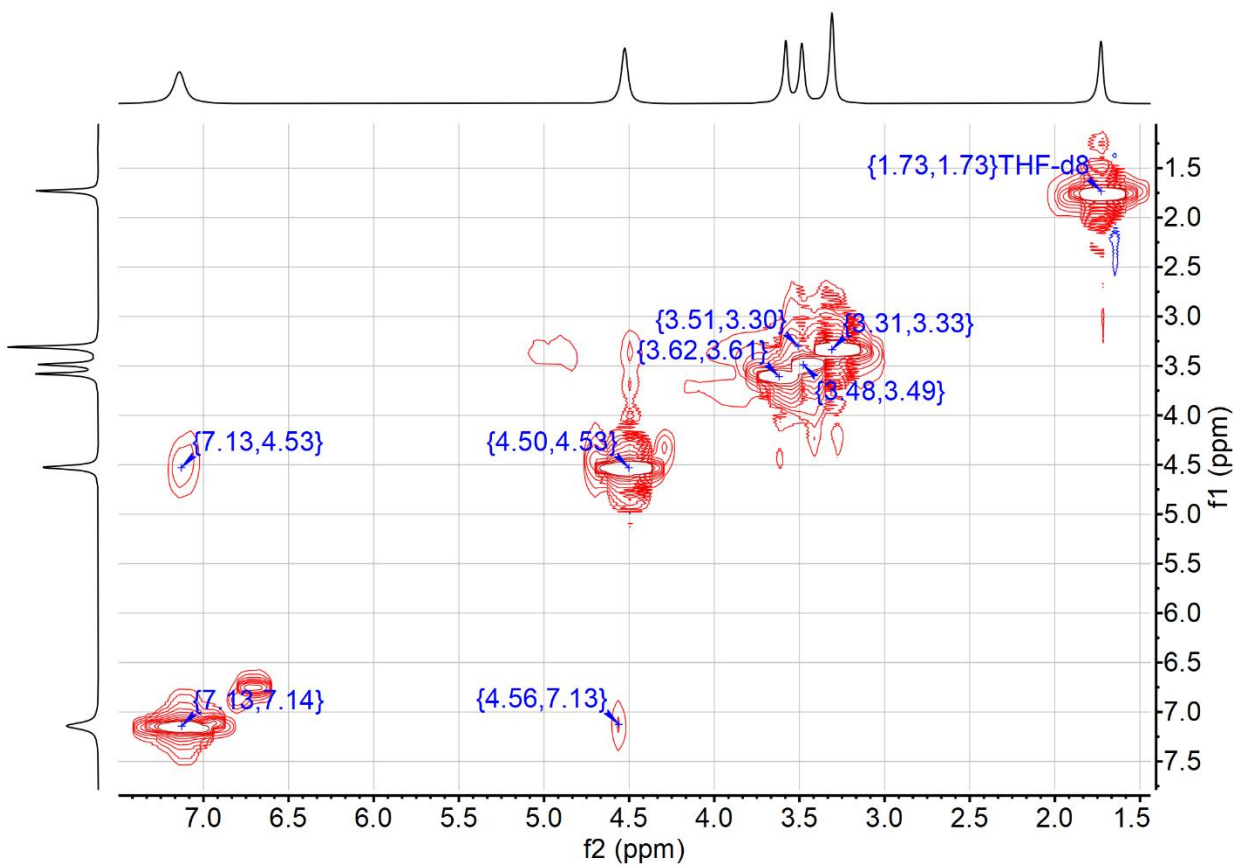

**Figure S12.** Magnification of the  $^1\text{H}$ - $^1\text{H}$  gCOSY spectrum of  $[\text{K}(\text{DME})_2][\text{U}(\text{dbCOT})_2]$ , **1**, (500 MHz, THF- $d_8$ , 25 °C).

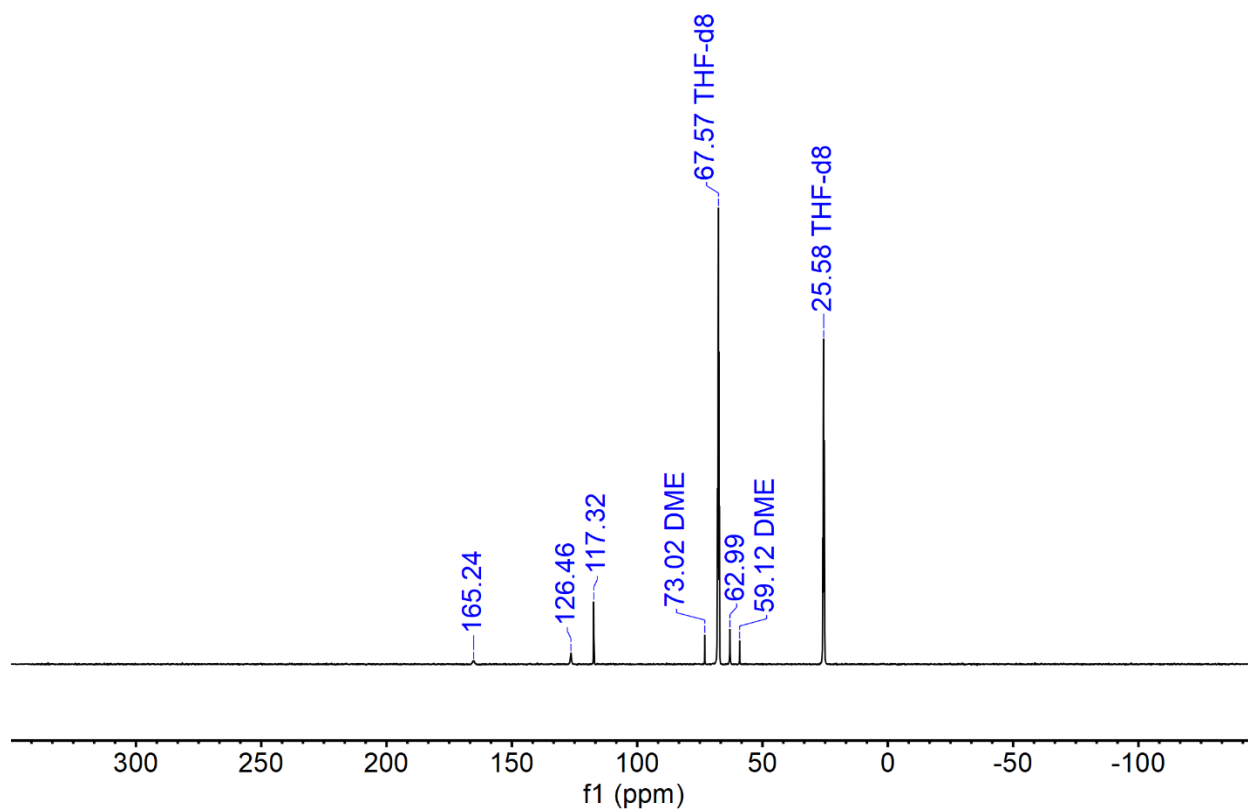

**Figure S13.** <sup>13</sup>C NMR spectrum of [K(DME)<sub>2</sub>][U(dbCOT)<sub>2</sub>], **1**, (126 MHz, THF-*d*<sub>8</sub>, 25 °C): δ 165.24 (C<sub>8</sub>H<sub>4</sub>), 126.46 (C<sub>8</sub>H<sub>4</sub>), 117.32 (C<sub>6</sub>H<sub>4</sub>) 73.02 (H<sub>3</sub>CO(CH<sub>2</sub>)<sub>2</sub>OCH<sub>3</sub>), 62.99 (C<sub>6</sub>H<sub>4</sub>), 59.12 (H<sub>3</sub>CO(CH<sub>2</sub>)<sub>2</sub>OCH<sub>3</sub>).

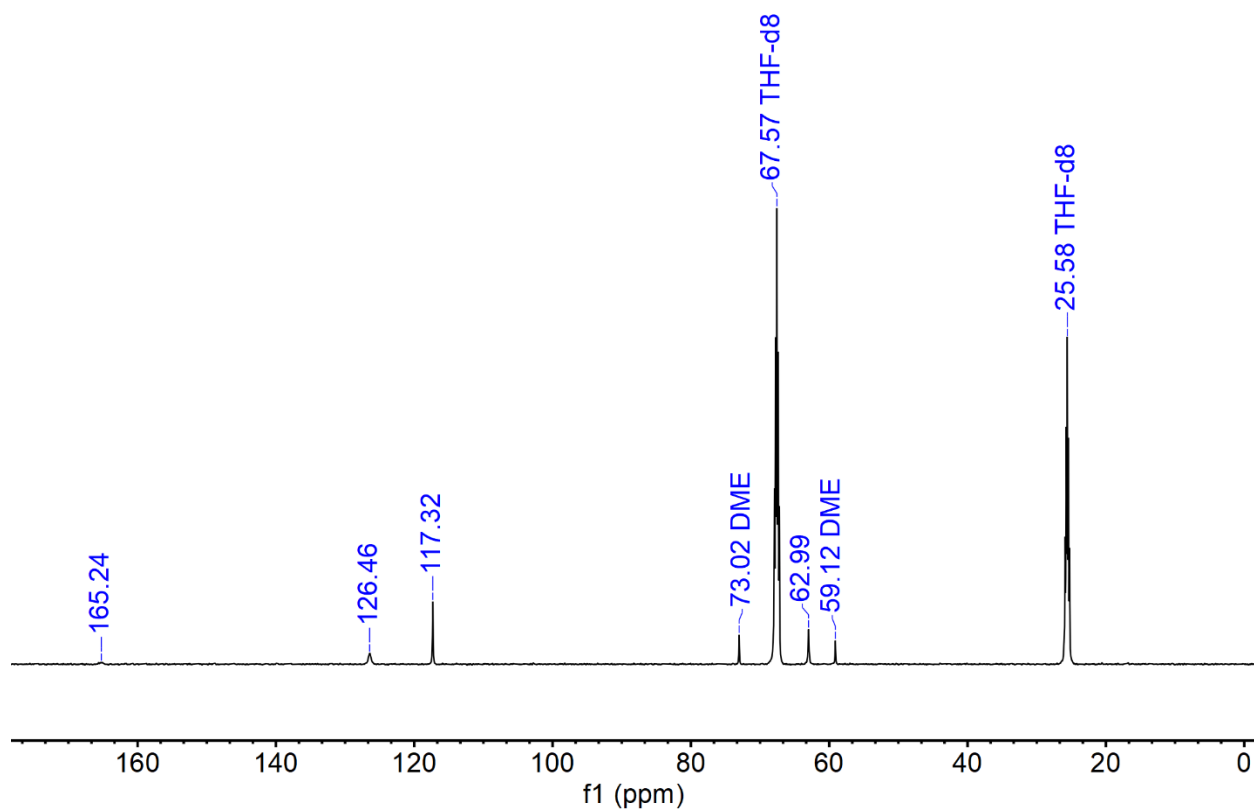

**Figure S14.** Magnification of the  $^{13}\text{C}$  NMR spectrum of  $[\text{K}(\text{DME})_2][\text{U}(\text{dbCOT})_2]$ , **1**, (126 MHz, THF- $d_8$ , 25 °C):  $\delta$  165.24 ( $\text{C}_8\text{H}_4$ ), 126.46 ( $\text{C}_8\text{H}_4$ ), 117.32 ( $\text{C}_6\text{H}_4$ ) 73.02 ( $\text{H}_3\text{CO}(\text{CH}_2)_2\text{OCH}_3$ ), 62.99 ( $\text{C}_6\text{H}_4$ ), 59.12 ( $\text{H}_3\text{CO}(\text{CH}_2)_2\text{OCH}_3$ ).

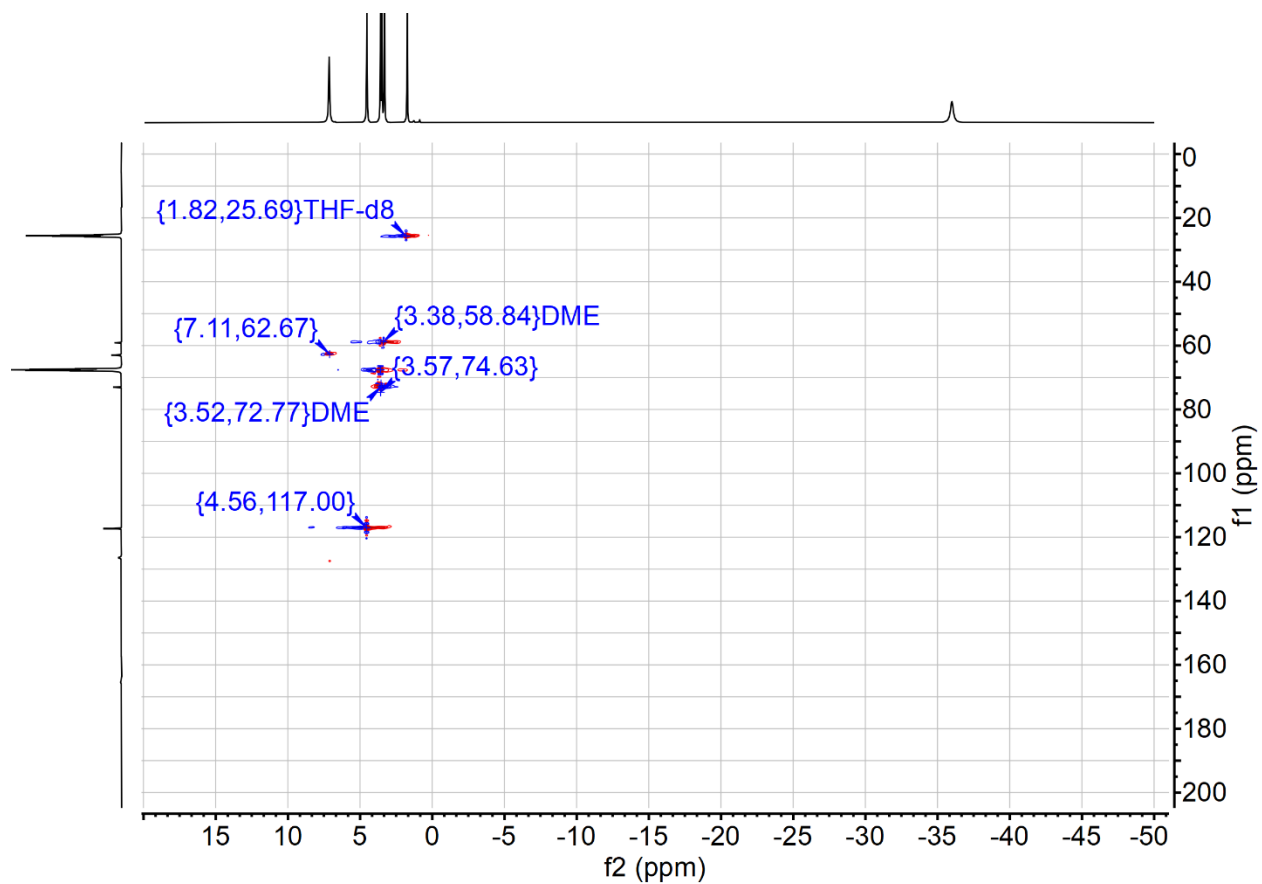

**Figure S15.**  $^1\text{H}$ - $^{13}\text{C}$  gHSQCAD spectrum of  $[\text{K}(\text{DME})_2][\text{U}(\text{dbCOT})_2]$ , **1**, ( $^1\text{H}$  500 MHz,  $^{13}\text{C}$  126 MHz, THF- $d_8$ , 25 °C).

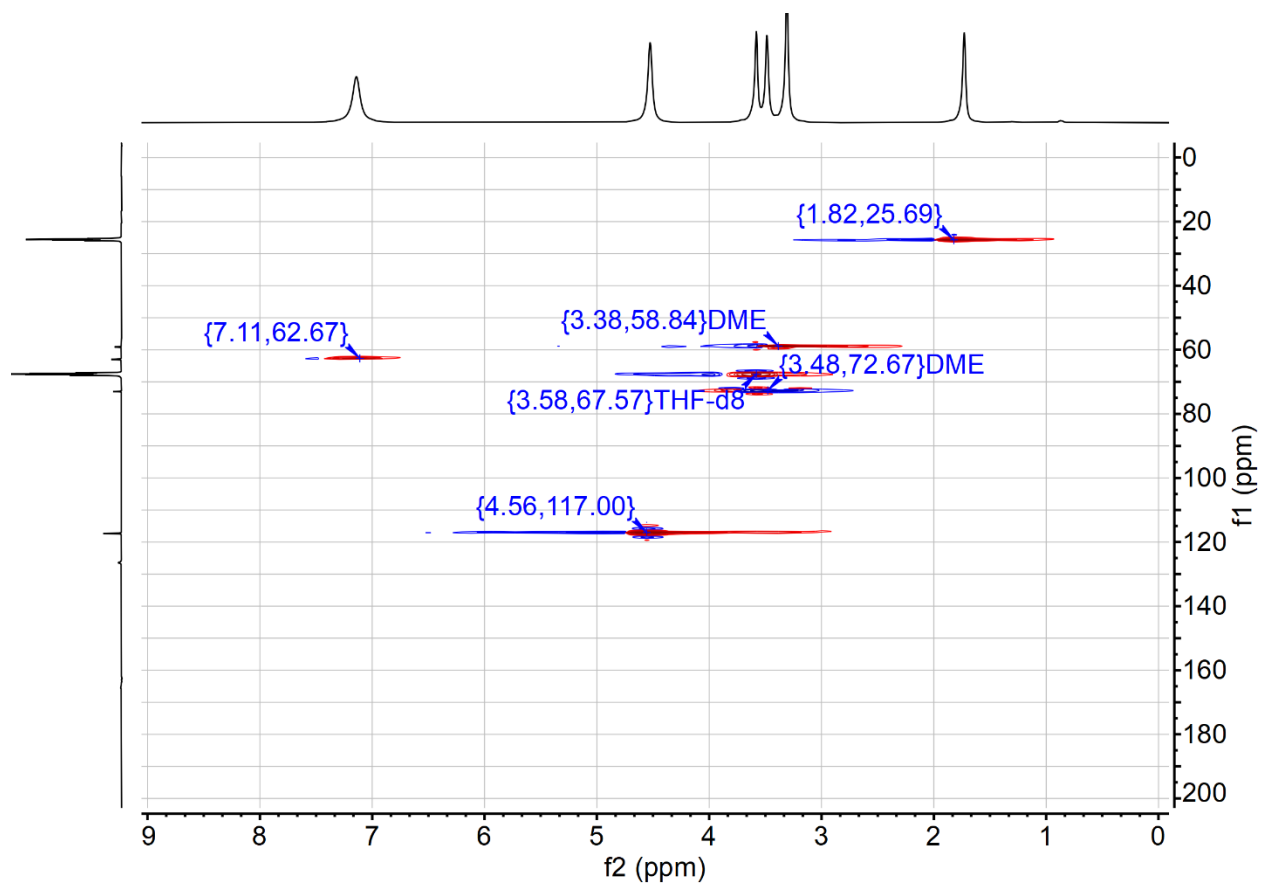

**Figure S16.** Magnification of the  $^1\text{H}$ - $^{13}\text{C}$  gHSQCAD spectrum of  $[\text{K}(\text{DME})_2][\text{U}(\text{dbCOT})_2]$ , **1**, ( $^1\text{H}$  500 MHz,  $^{13}\text{C}$  126 MHz, THF- $d_8$ , 25 °C).



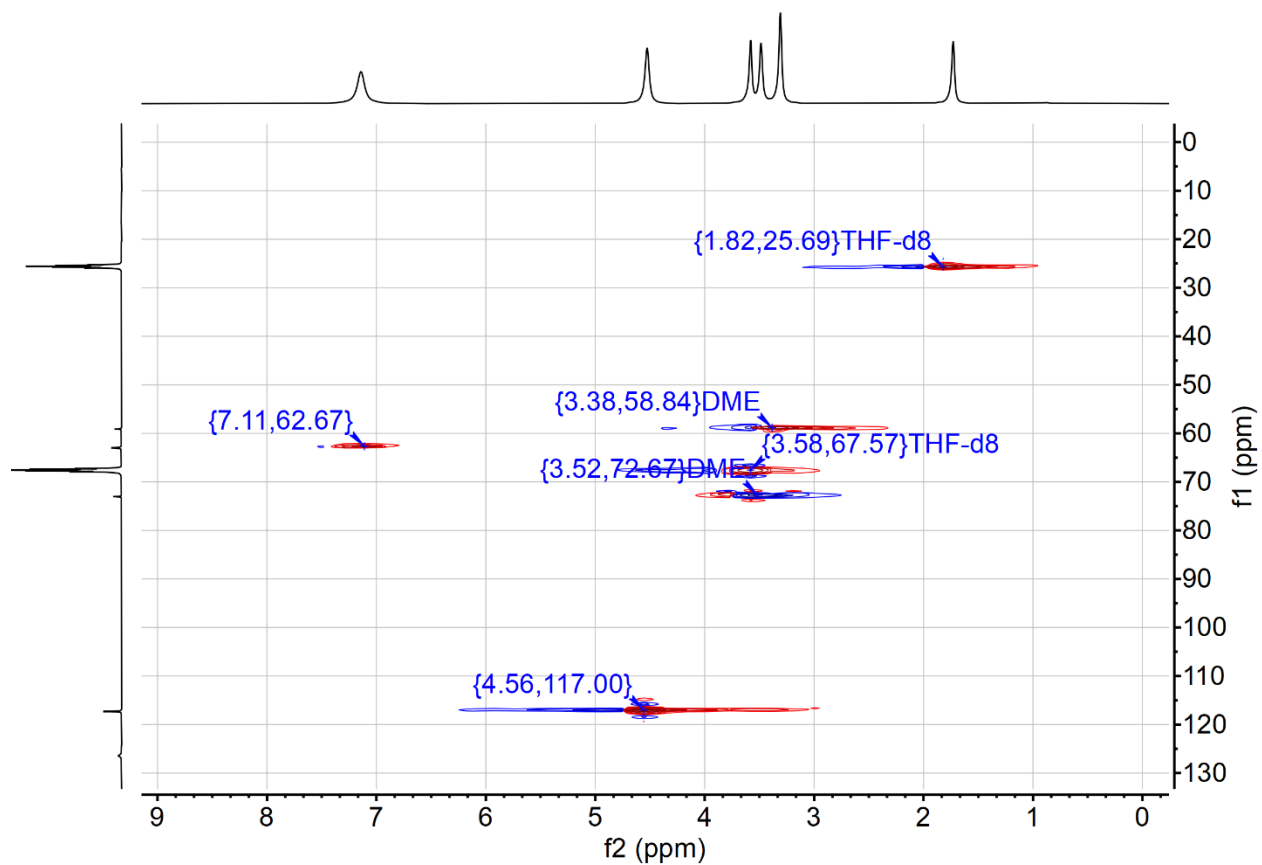

**Figure S17.** Magnification of the  $^1\text{H}$ - $^{13}\text{C}$  gHSQCAD spectrum of  $[\text{K}(\text{DME})_2][\text{U}(\text{dbCOT})_2]$ , **1**, ( $^1\text{H}$  500 MHz,  $^{13}\text{C}$  126 MHz, THF- $d_8$ , 25 °C).

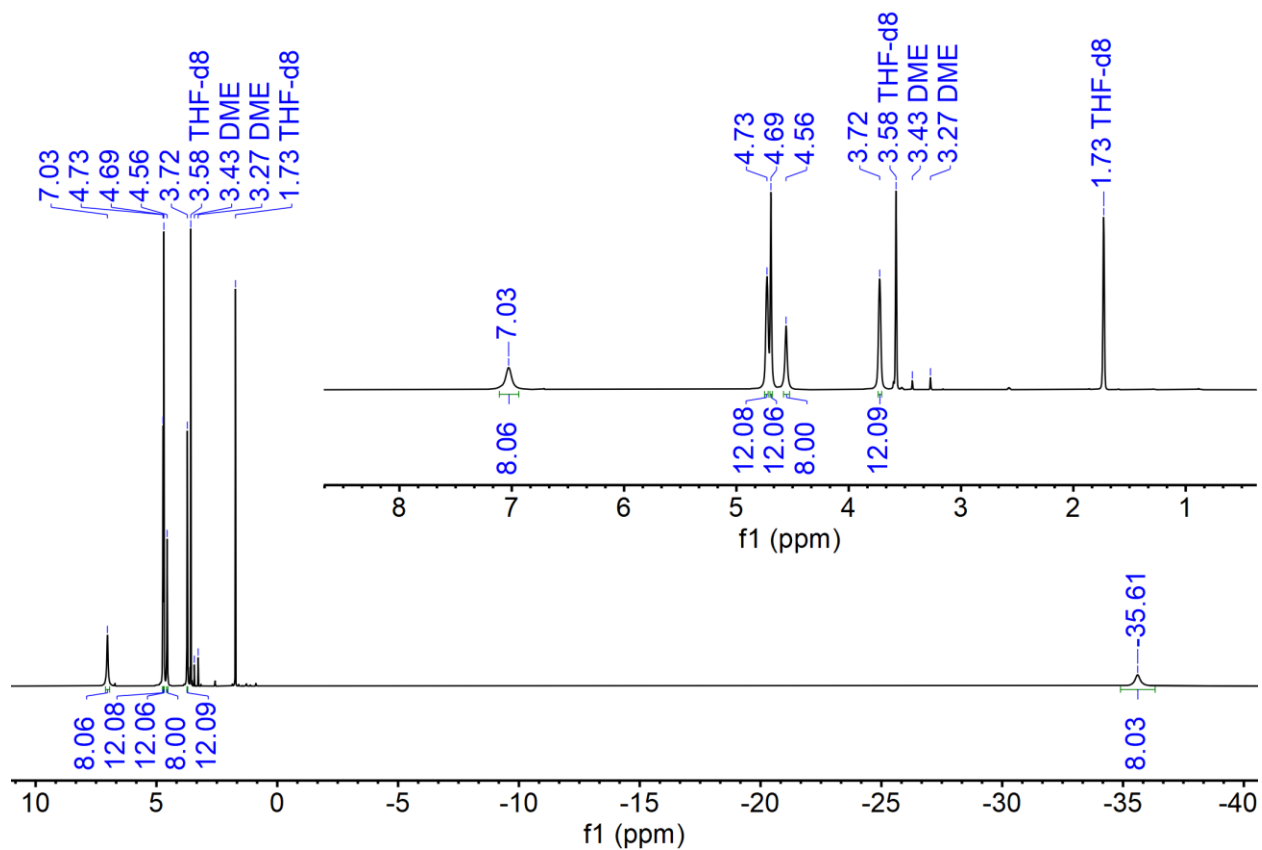

**Figure S18.**  $^1\text{H}$  NMR spectrum of  $[\text{K}(\text{crypt-222})][\text{U}(\text{dbCOT})_2]$ , **2**, (500 MHz,  $\text{THF-d}_8$ , 25  $^\circ\text{C}$ ): 7.03 (br s, 8 H,  $\text{COT}(\text{CH}(\text{CH})_2\text{CH})_2$ ), 4.73 (s, 12 H,  $\text{OCH}_2\text{CH}_2\text{N}$ ), 4.69 (s, 12 H,  $\text{O}(\text{CH}_2)_2\text{O}$ ), 4.56 (br s, 8 H,  $\text{COT}(\text{CH}(\text{CH})_2\text{CH})_2$ ), 3.72 (s, 12 H,  $\text{OCH}_2\text{CH}_2\text{N}$ ), -35.61 (br s, 8 H ( $\text{COT-H}$ )).

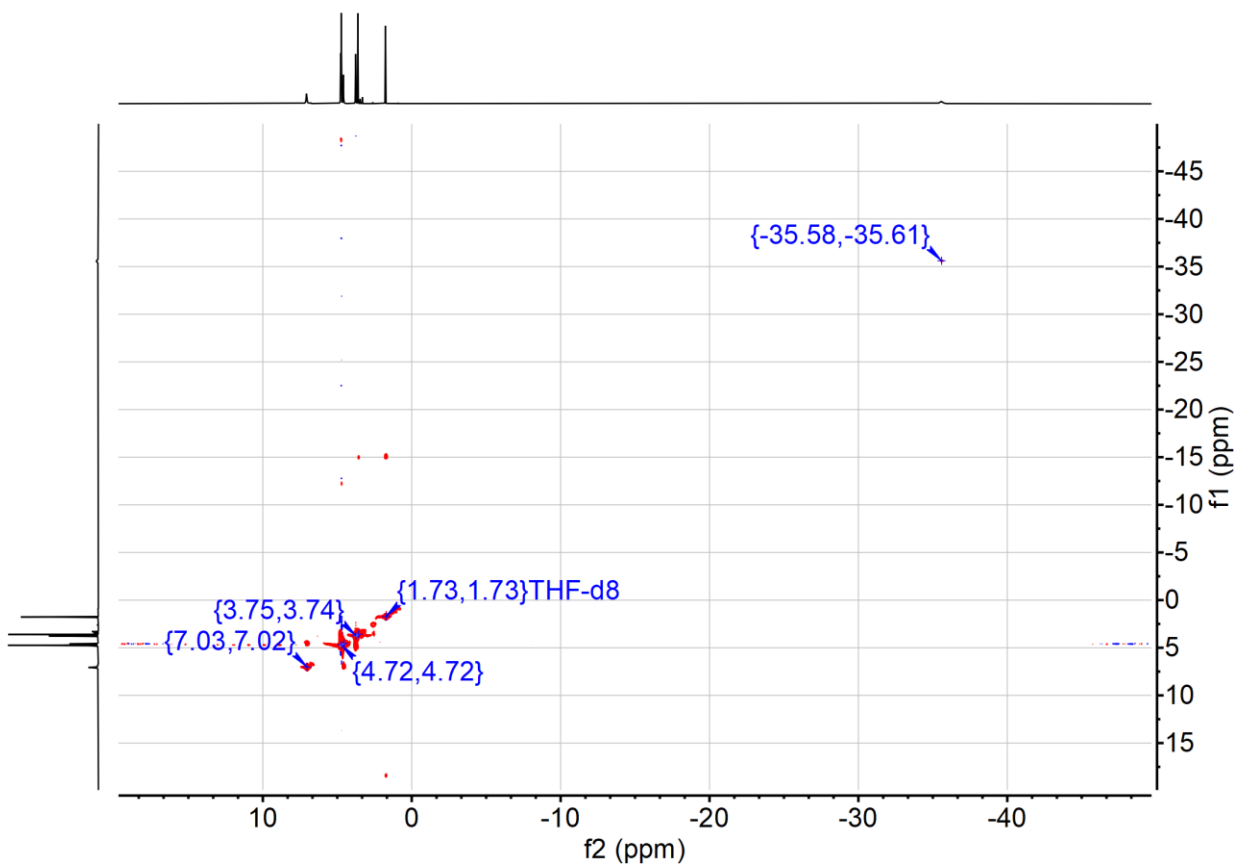

**Figure S19.**  $^1\text{H}$ - $^1\text{H}$  gCOSY spectrum of  $[\text{K}(\text{crypt-222})][\text{U}(\text{dbCOT})_2]$ , **2**, (500 MHz, THF- $d_8$ , 25 °C).

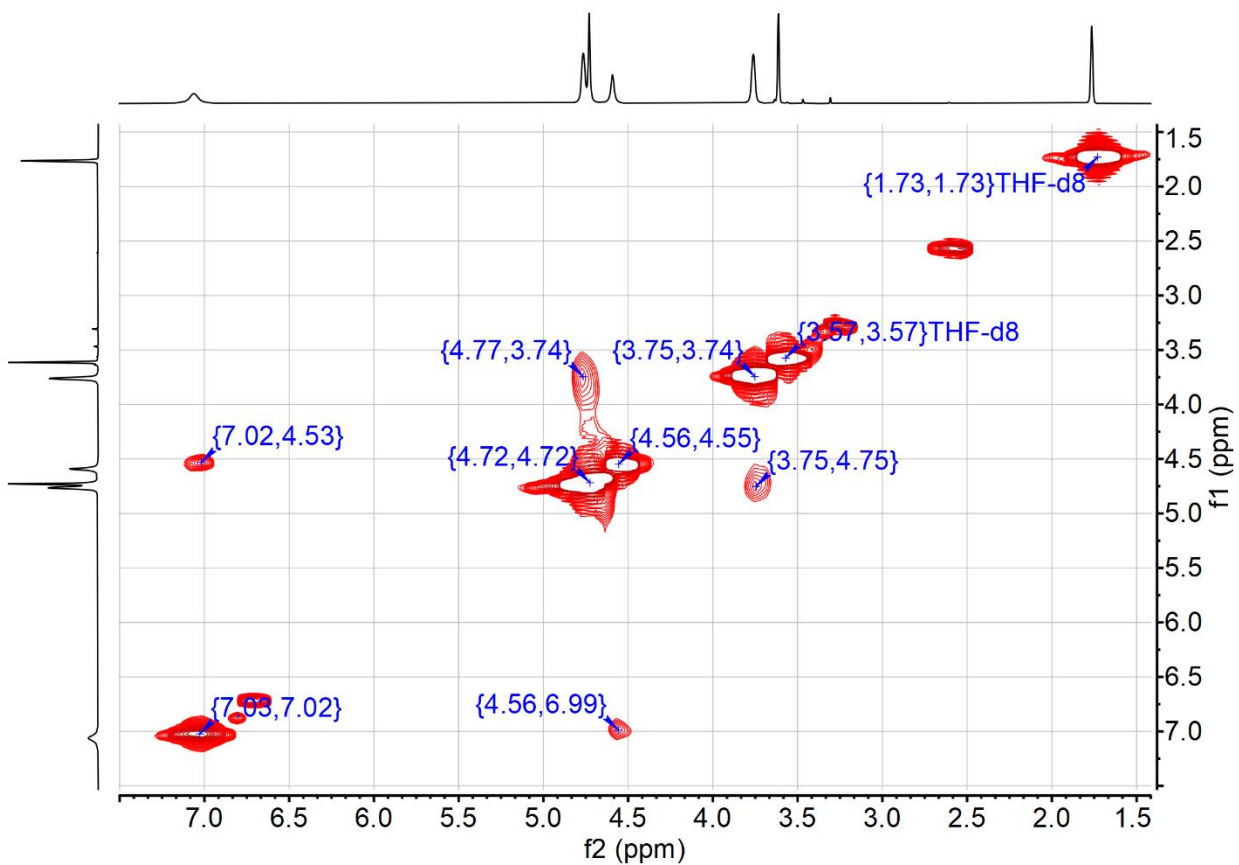

**Figure S20.** Magnification of the  $^1\text{H}$ - $^1\text{H}$  gCOSY spectrum of  $[\text{K}(\text{crypt-222})][\text{U}(\text{dbCOT})_2]$ , **2**, (500 MHz,  $\text{THF-d}_8$ , 25 °C).

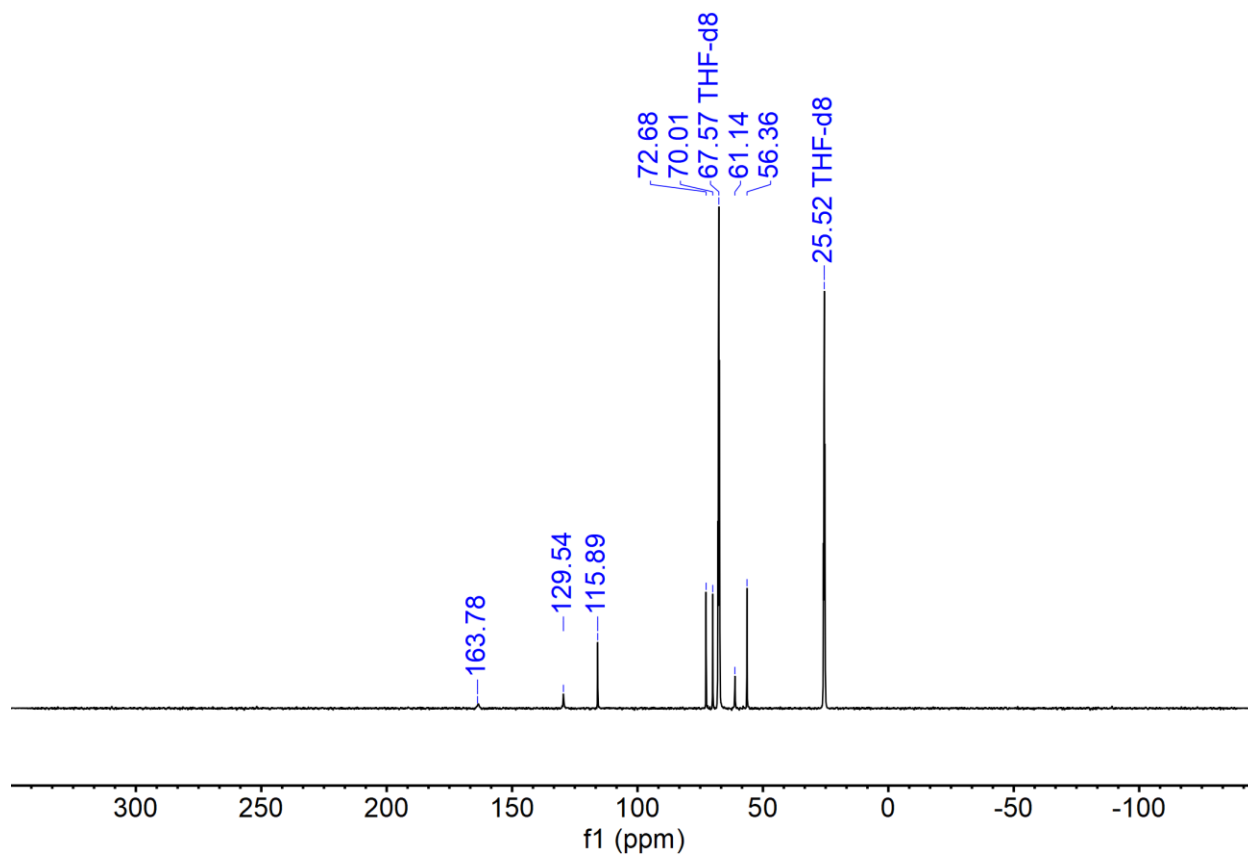

**Figure S21.**  $^{13}\text{C}$  NMR spectrum of  $[\text{K}(\text{crypt-222})][\text{U}(\text{dbCOT})_2]$ , **2**, (126 MHz, THF- $d_8$ , 25 °C):  $\delta$  163.78 ( $\text{C}_8\text{H}_4$ ), 129.54 ( $\text{C}_8\text{H}_4$ ), 115.89 ( $\text{C}_6\text{H}_4$ ) 72.68 ( $\text{O}(\text{C}_2\text{H}_2)\text{O}$ ), 70.01 ( $\text{OCH}_2\text{CH}_2\text{N}$ ), 61.14 ( $\text{C}_6\text{H}_4$ ), 56.36 ( $\text{OCH}_2\text{CH}_2\text{N}$ ).

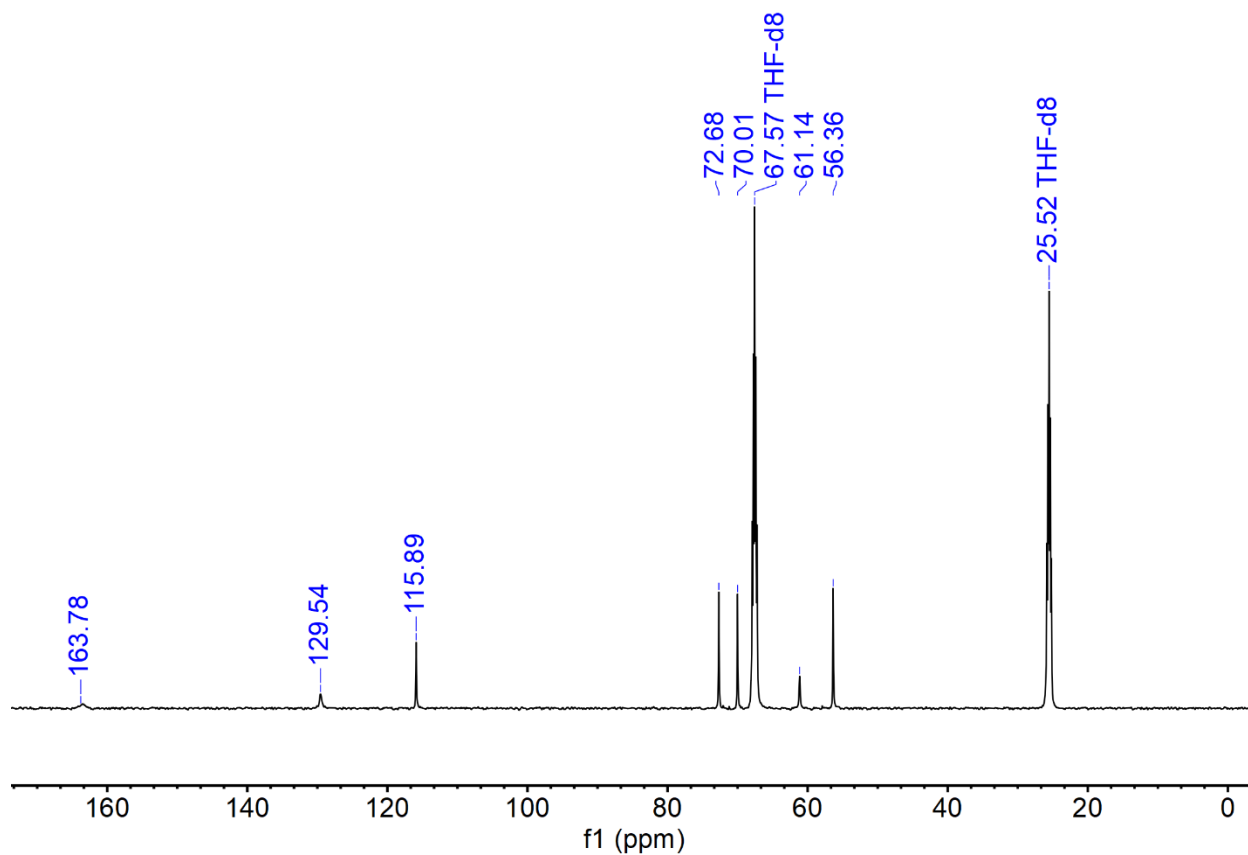

**Figure S22.** Magnification of the <sup>13</sup>C NMR spectrum of [K(crypt-222)][U(dbCOT)<sub>2</sub>], **2**, (126 MHz, THF-*d*<sub>8</sub>, 25 °C): δ 163.78 (C<sub>8</sub>H<sub>4</sub>), 129.54 (C<sub>8</sub>H<sub>4</sub>), 115.89 (C<sub>6</sub>H<sub>4</sub>) 72.68 (O(CH<sub>2</sub>)<sub>2</sub>O), 70.01 (OCH<sub>2</sub>CH<sub>2</sub>N), 61.14 (C<sub>6</sub>H<sub>4</sub>), 56.36 (OCH<sub>2</sub>CH<sub>2</sub>N).

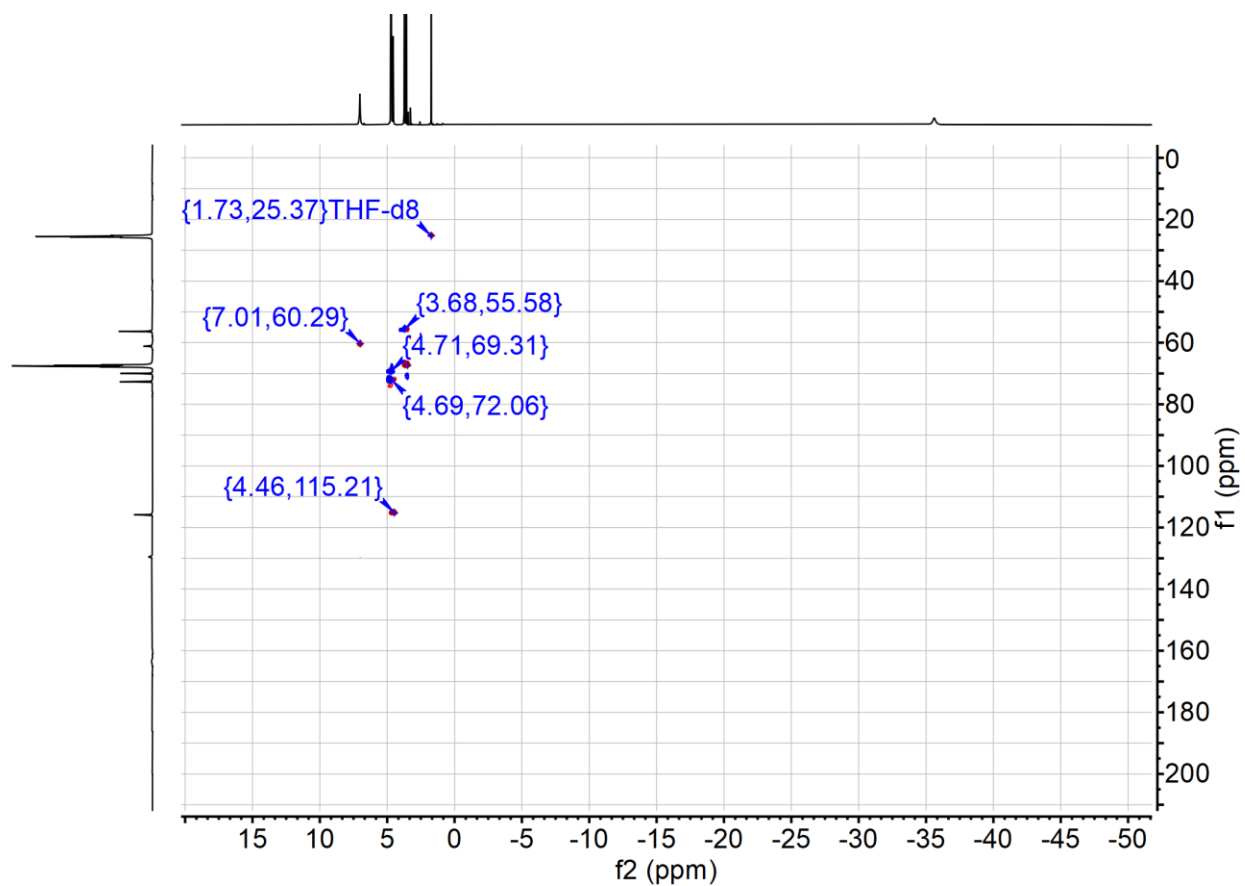

**Figure S23.**  $^1\text{H}$ - $^{13}\text{C}$  gHSQCAD spectrum of  $[\text{K}(\text{crypt-222})][\text{U}(\text{dbCOT})_2]$ , **2**, ( $^1\text{H}$  500 MHz,  $^{13}\text{C}$  126 MHz, THF-*d*<sub>8</sub>, 25 °C).

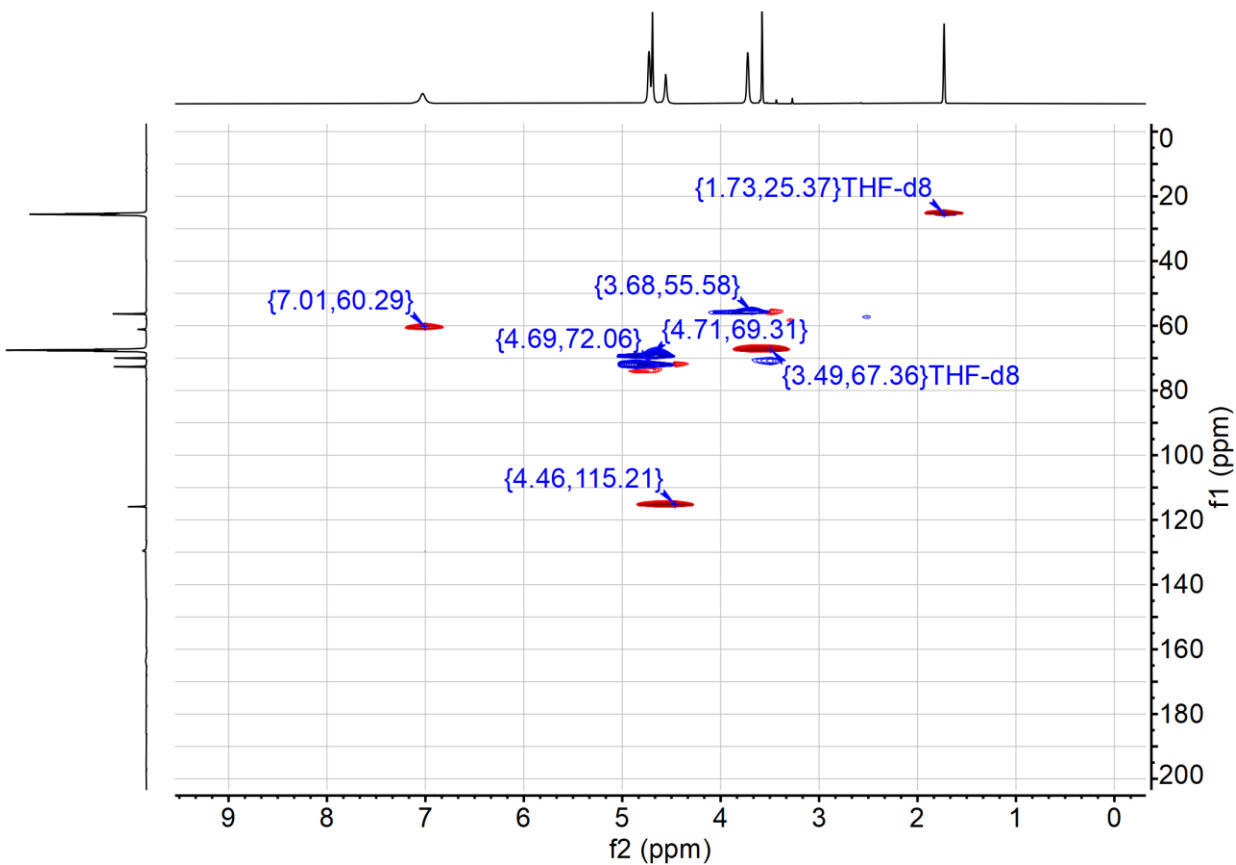

**Figure S24.** Magnification of the  $^1\text{H}$ - $^{13}\text{C}$  gHSQCAD spectrum of  $[\text{K}(\text{crypt-222})][\text{U}(\text{dbCOT})_2]$ , **2**, ( $^1\text{H}$  500 MHz,  $^{13}\text{C}$  126 MHz, THF- $d_8$ , 25 °C).



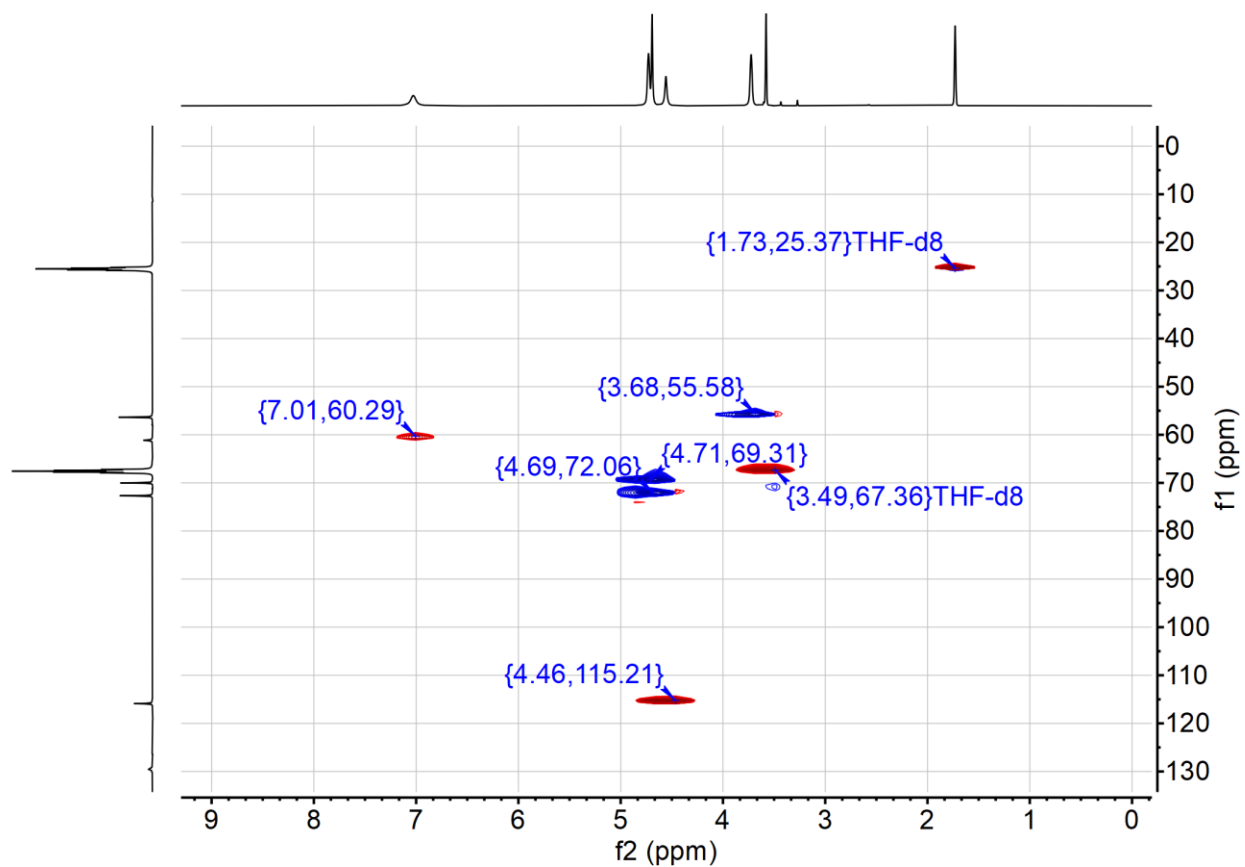

**Figure S25.** Magnification of the  $^1\text{H}$ - $^{13}\text{C}$  gHSQCAD spectrum of  $[\text{K}(\text{crypt-222})][\text{U}(\text{dbCOT})_2]$ , **2**, ( $^1\text{H}$  500 MHz,  $^{13}\text{C}$  126 MHz, THF- $d_8$ , 25 °C).

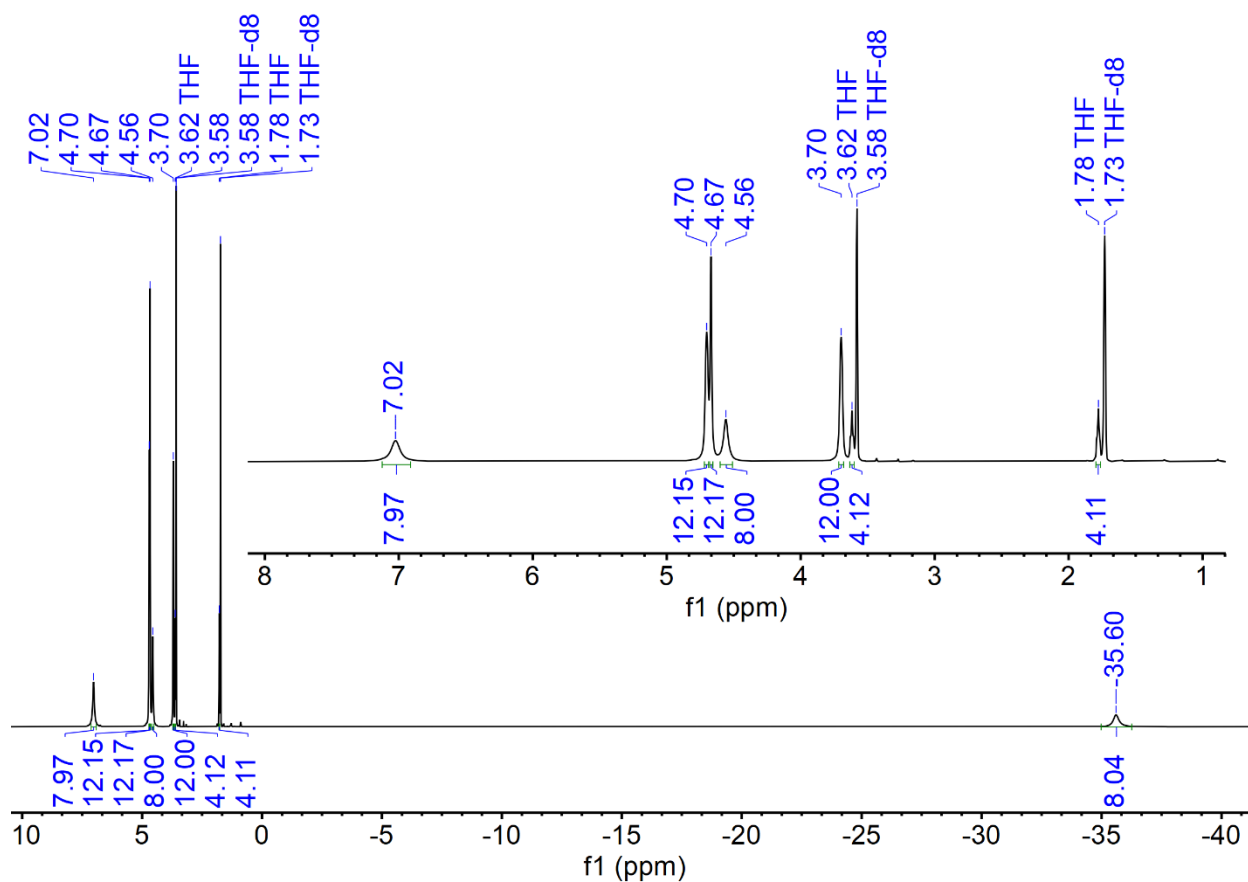

**Figure S26.**  $^1\text{H}$  NMR spectrum of  $[\text{K}(\text{crypt-222})][\text{U}(\text{dbCOT})_2(\text{THF})]$ , **3**, (500 MHz,  $\text{THF-d}_8$ , 25 °C):  $\delta$  7.02 (br s, 8 H, COT(CH(CH)<sub>2</sub>CH)<sub>2</sub>), 4.70 (s, 12 H, OCH<sub>2</sub>CH<sub>2</sub>N), 4.67 (s, 12 H, O(CH<sub>2</sub>)<sub>2</sub>O), 4.56 (br s, 8 H, COT(CH(CH)<sub>2</sub>CH)<sub>2</sub>), 3.70 (s, 12 H, OCH<sub>2</sub>CH<sub>2</sub>N), 3.62 (br, t, 4 H, THF-H<sub>2</sub>COCH<sub>2</sub>), 1.78 (br, t, 4 H, THF-H<sub>2</sub>C(CH<sub>2</sub>)<sub>2</sub>CH<sub>2</sub>), -35.60 (br s, 8 H (COT-H)).

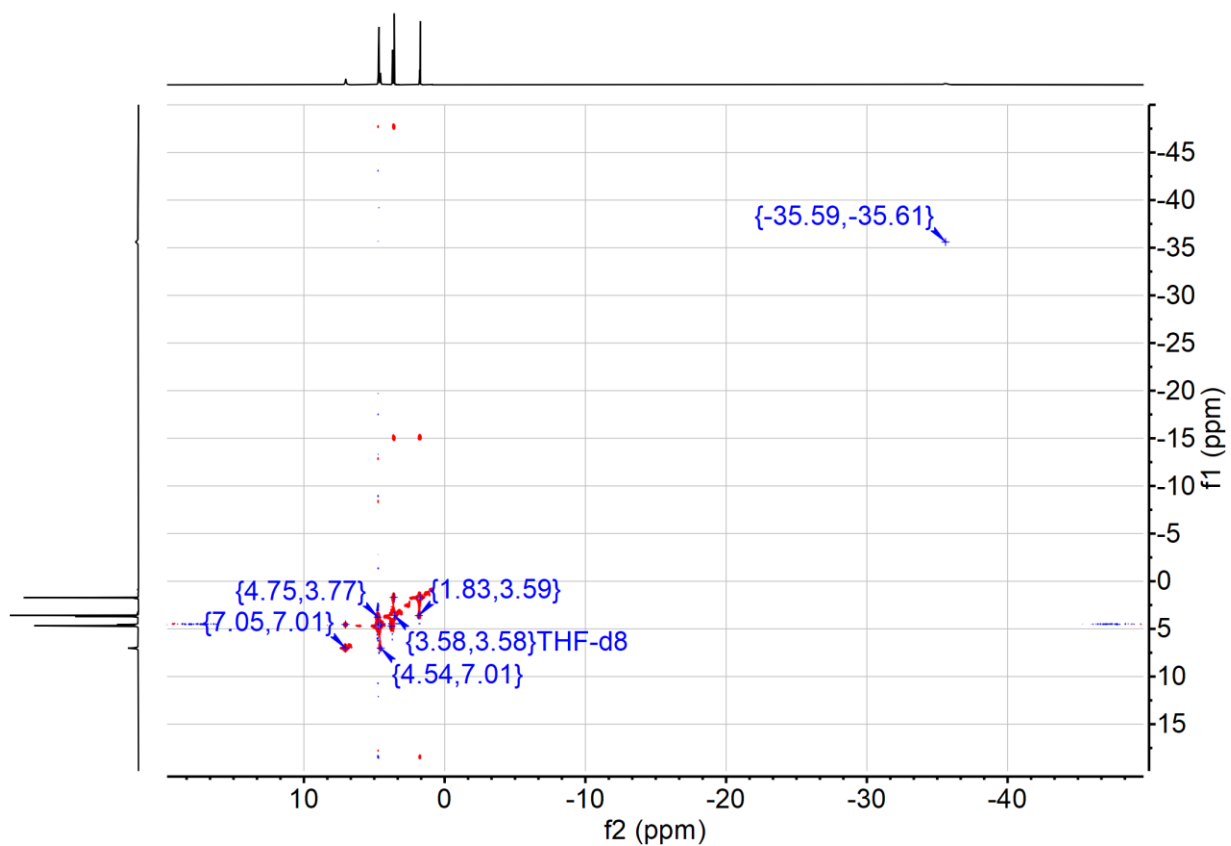

**Figure S27.**  $^1\text{H}$ - $^1\text{H}$  gCOSY spectrum of  $[\text{K}(\text{crypt-222})][\text{U}(\text{dbCOT})_2(\text{THF})]$ , **3**, (500 MHz,  $\text{THF-}d_8$ , 25 °C).

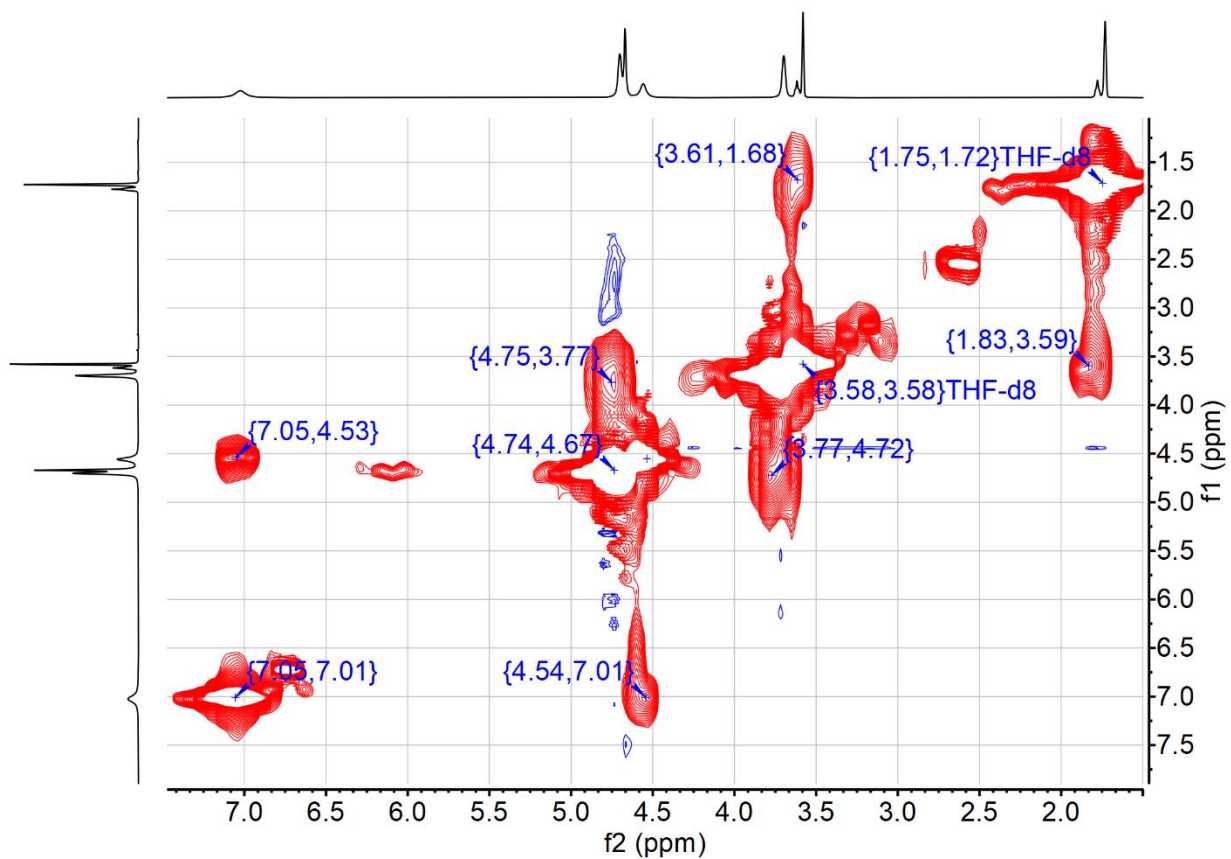

**Figure S28.** Magnification of the  $^1\text{H}$ - $^1\text{H}$  gCOSY spectrum of  $[\text{K}(\text{crypt-222})][\text{U}(\text{dbCOT})_2(\text{THF})]$ , **3**, (500 MHz,  $\text{THF-}d_8$ , 25 °C).

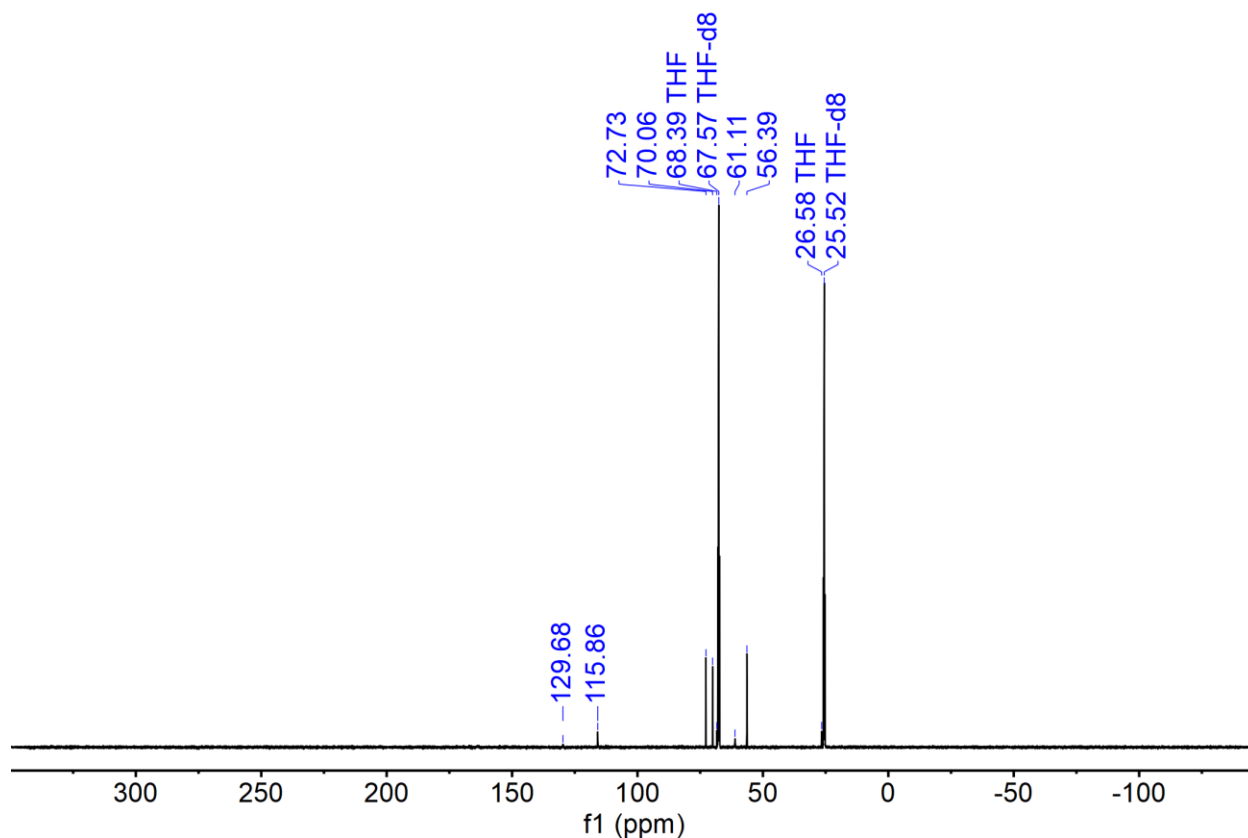

**Figure S29.**  $^{13}\text{C}$  NMR spectrum of  $[\text{K}(\text{crypt-222})][\text{U}(\text{dbCOT})_2(\text{THF})]$ , **3**, (126 MHz,  $\text{THF-d}_8$ , 25 °C):  $\delta$  129.68 ( $\underline{\text{C}}_8\text{H}_4$ ), 115.86 ( $\underline{\text{C}}_6\text{H}_4$ ), 72.73 ( $\text{O}(\underline{\text{C}}\text{H}_2)_2\text{O}$ ), 70.06 ( $\text{O}\underline{\text{C}}\text{H}_2\text{CH}_2\text{N}$ ), 68.39 ( $\text{THF-H}_2\underline{\text{C}}\text{O}\underline{\text{C}}\text{H}_2$ ), 61.11 ( $\underline{\text{C}}_6\text{H}_4$ ), 56.39 ( $\text{OCH}_2\underline{\text{C}}\text{H}_2\text{N}$ ), 28.58 ( $\text{THF-H}_2\underline{\text{C}}(\underline{\text{C}}\text{H}_2)_2\text{CH}_2$ ). Owing to the poor solubility of **3** in THF, the  $^{13}\text{C}$  resonance expected at approximately 163 ppm is absent, presumably owing to the lower concentration of **3** with regards to **1** and **2**, respectively.

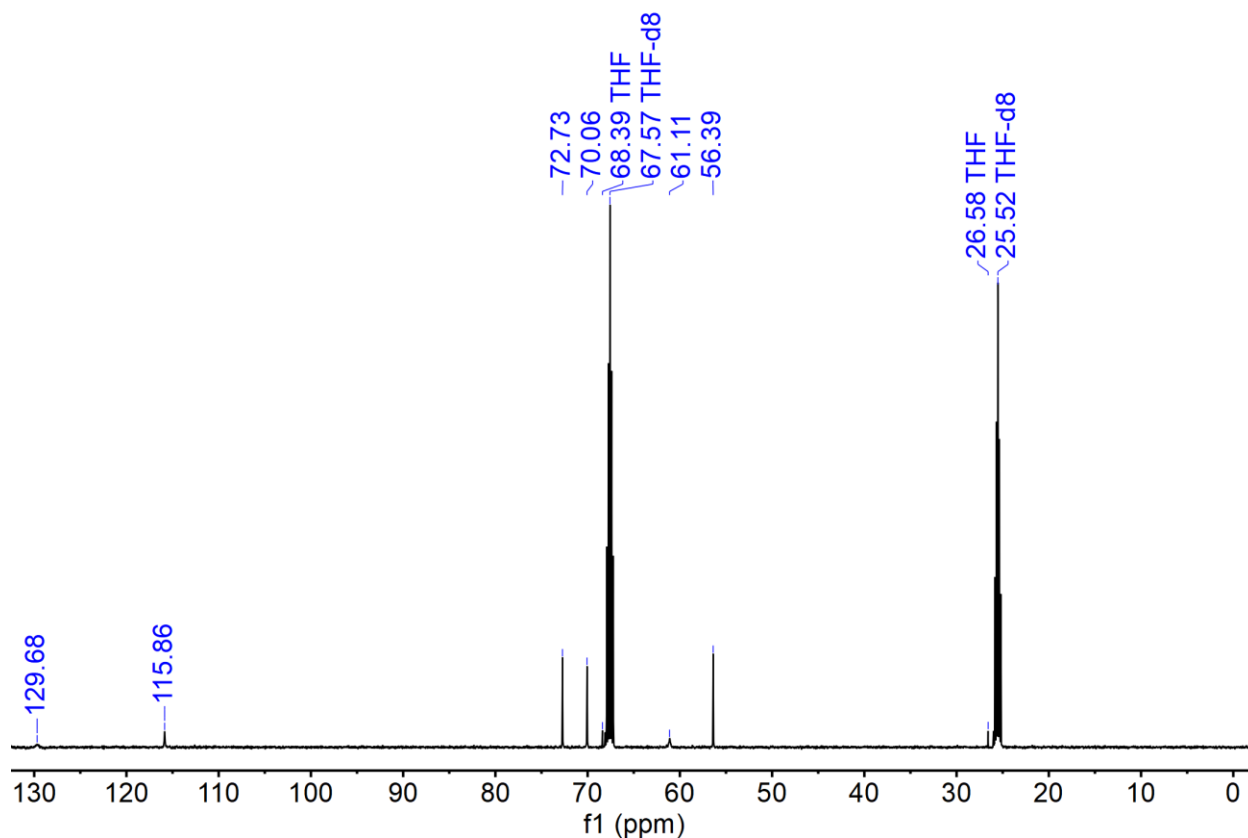

**Figure S30.** Magnification of the  $^{13}\text{C}$  NMR spectrum of  $[\text{K}(\text{crypt-222})][\text{U}(\text{dbCOT})_2(\text{THF})]$ , **3**, (126 MHz,  $\text{THF-}d_8$ , 25 °C):  $\delta$  129.68 ( $\text{C}_8\text{H}_4$ ), 115.86 ( $\text{C}_6\text{H}_4$ ), 72.73 ( $\text{O}(\text{CH}_2)_2\text{O}$ ), 70.06 ( $\text{OCH}_2\text{CH}_2\text{N}$ ), 68.39 ( $\text{THF-H}_2\text{COCH}_2$ ), 67.57 ( $\text{THF-}d_8$ ), 61.11 ( $\text{C}_6\text{H}_4$ ), 56.39 ( $\text{OCH}_2\text{CH}_2\text{N}$ ), 26.58 ( $\text{THF-H}_2\text{C}(\text{CH}_2)_2\text{CH}_2$ ). Owing to the poor solubility of **3** in THF, the  $^{13}\text{C}$  resonance expected at approximately 163 ppm is absent, presumably owing to the lower concentration of **3** with regards to **1** and **2**, respectively.

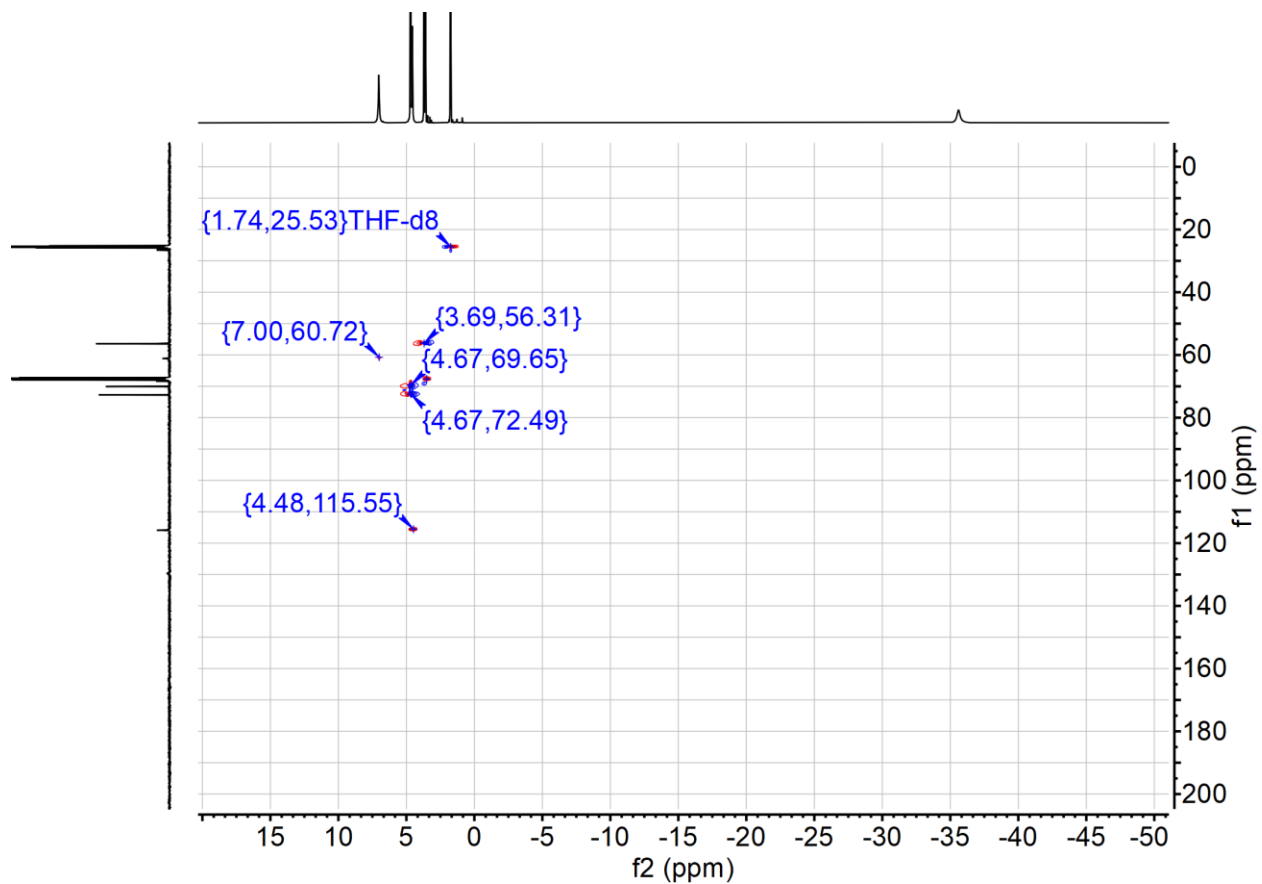

**Figure S31.**  $^1\text{H}$ - $^{13}\text{C}$  gHSQCAD spectrum of  $[\text{K}(\text{crypt-222})][\text{U}(\text{dbCOT})_2(\text{THF})]$ , **3**, ( $^1\text{H}$  500 MHz,  $^{13}\text{C}$  126 MHz, THF- $d_8$ , 25 °C).

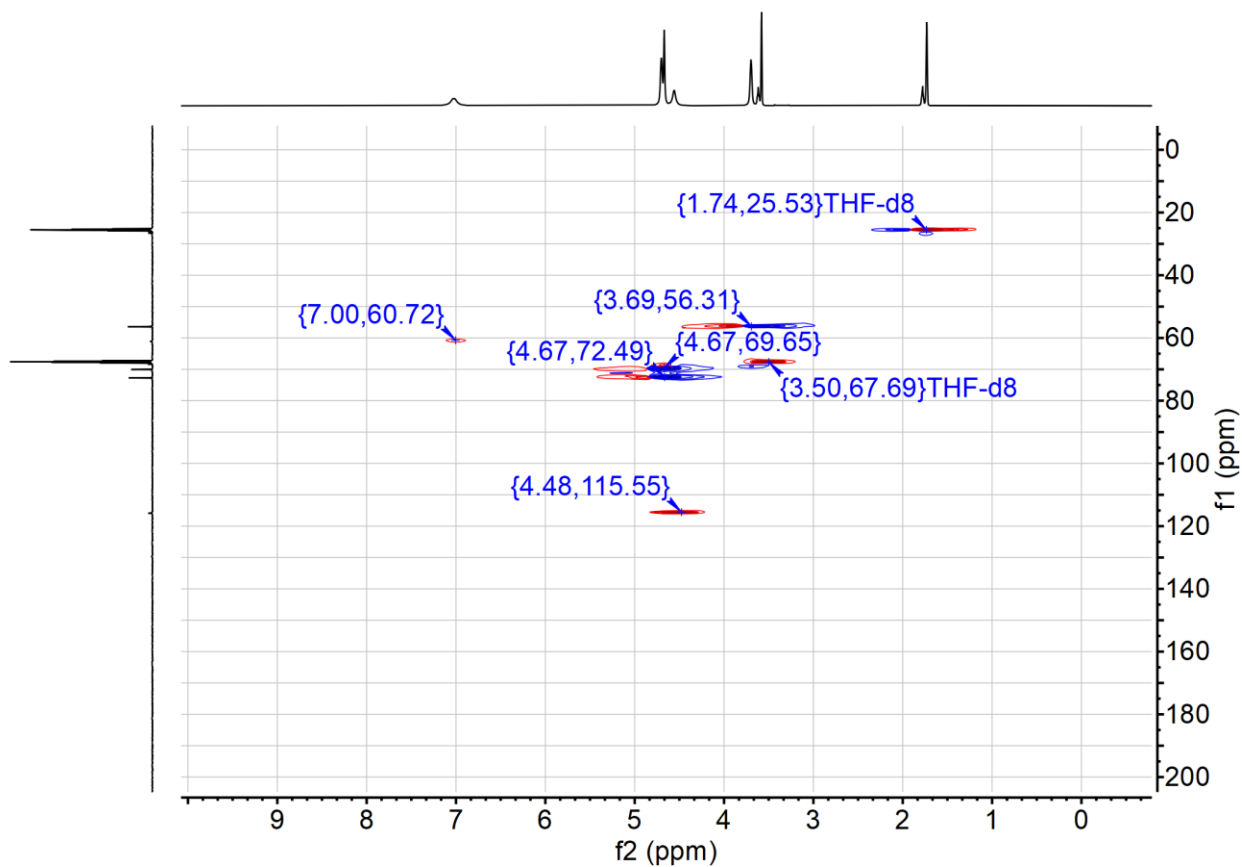

**Figure S32.** Magnification of the  $^1\text{H}$ - $^{13}\text{C}$  gHSQCAD spectrum of  $[\text{K}(\text{crypt-222})][\text{U}(\text{dbCOT})_2(\text{THF})]$ , **3**, ( $^1\text{H}$  500 MHz,  $^{13}\text{C}$  126 MHz, THF- $d_8$ , 25 °C).



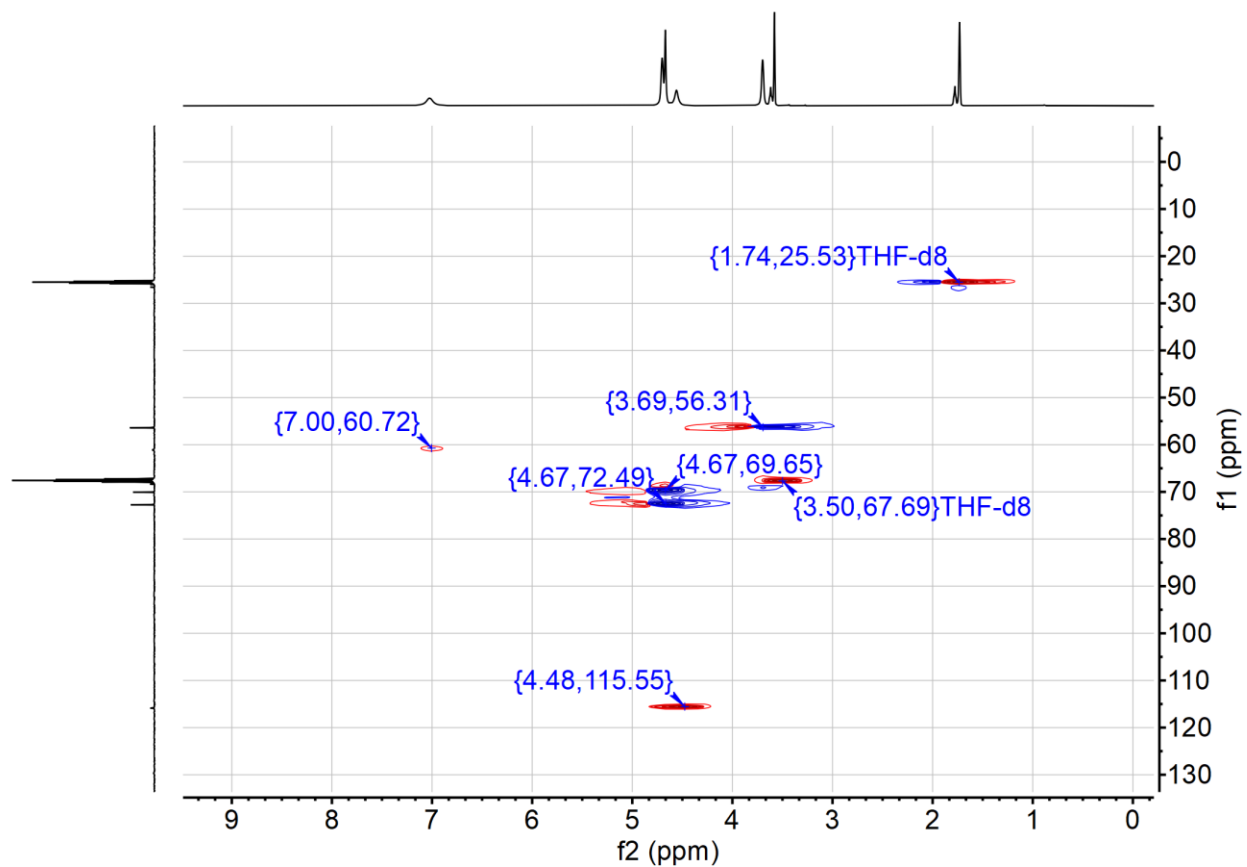

**Figure S33.** Magnification of the  $^1\text{H}$ - $^{13}\text{C}$  gHSQCAD spectrum of  $[\text{K}(\text{crypt-222})][\text{U}(\text{dbCOT})_2(\text{THF})]$ , **3**, ( $^1\text{H}$  500 MHz,  $^{13}\text{C}$  126 MHz, THF- $d_8$ , 25 °C).

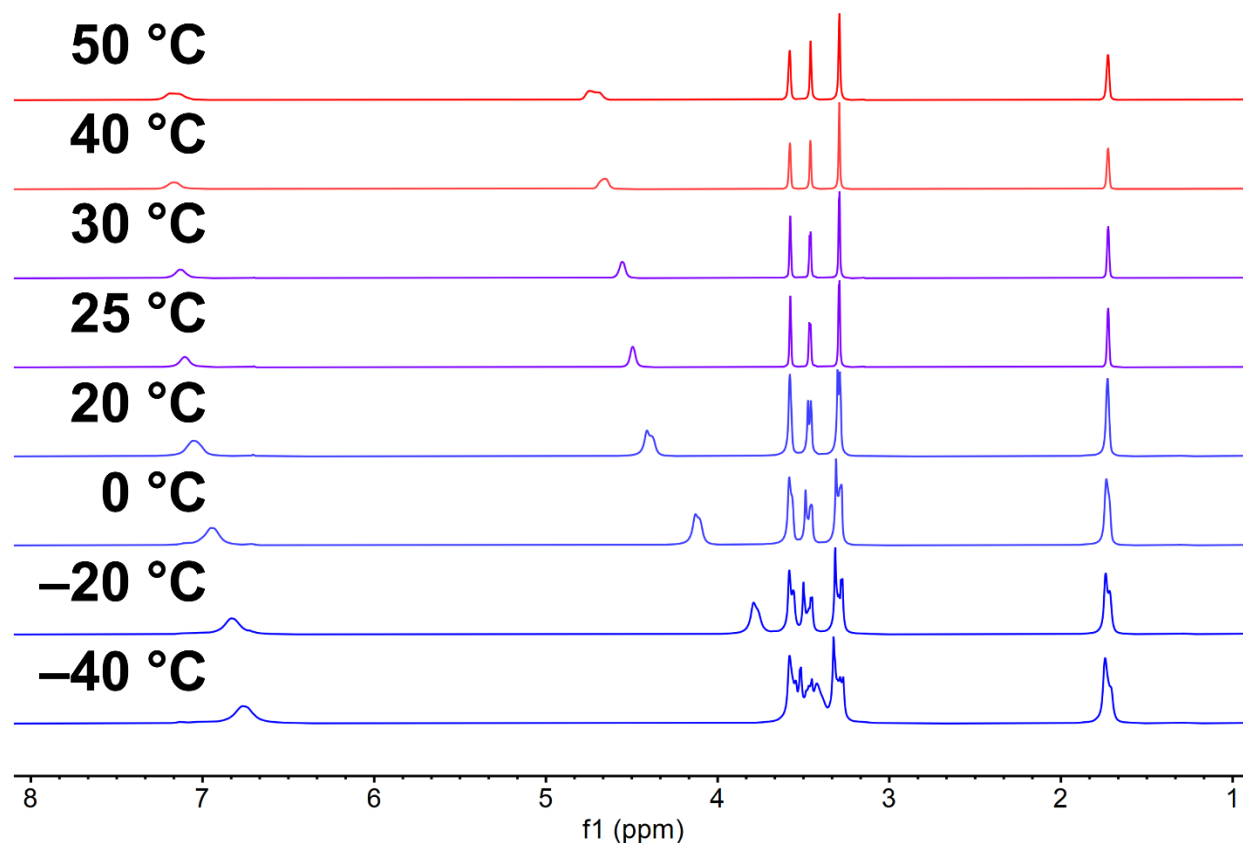

**Figure S34.** Variable-temperature <sup>1</sup>H NMR spectra of [K(DME)<sub>2</sub>][U(dbCOT)<sub>2</sub>], **1**, from 1 to 8 ppm in THF-d<sub>8</sub> obtained with a 500 MHz spectrometer.

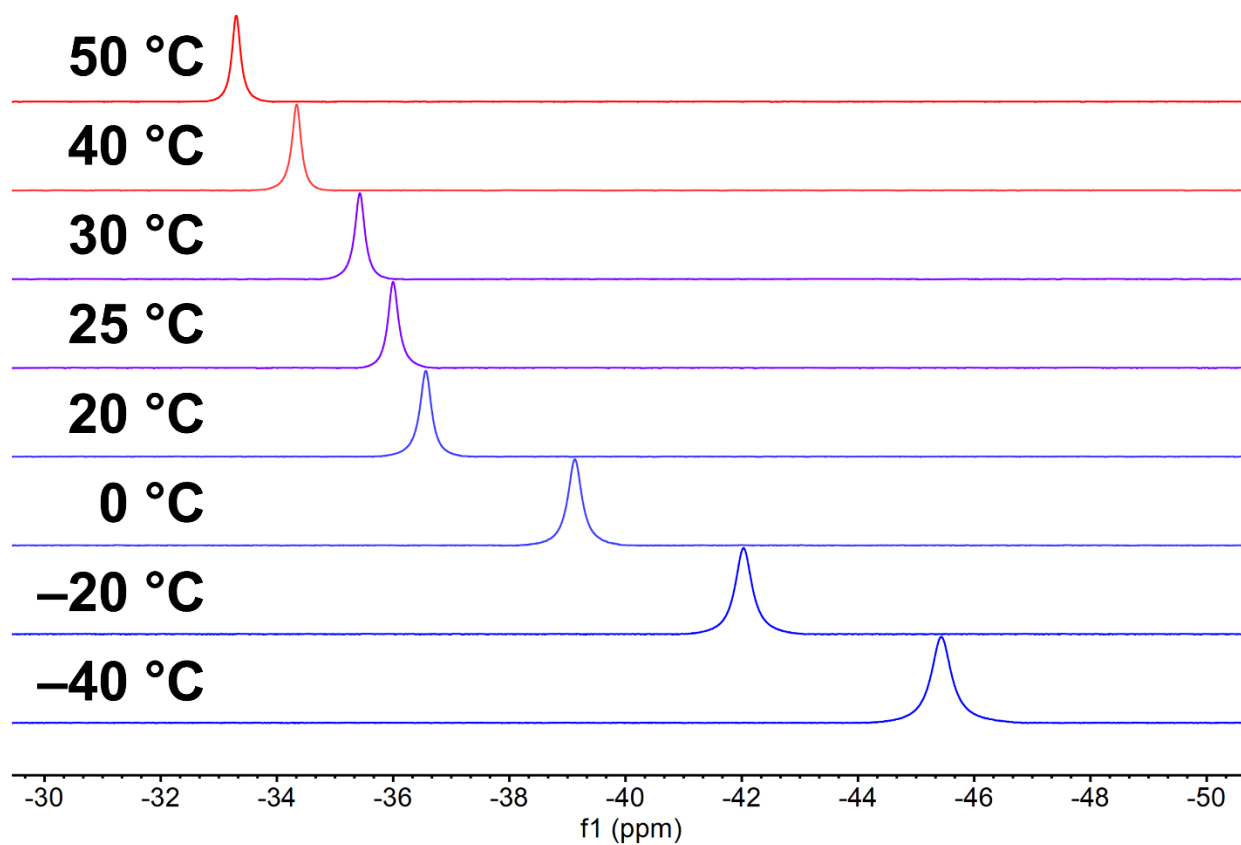

**Figure S35.** Variable-temperature <sup>1</sup>H NMR spectra of [K(DME)<sub>2</sub>][U(dbCOT)<sub>2</sub>], **1**, from -30 to -50 ppm in THF-d<sub>8</sub> obtained with a 500 MHz spectrometer.

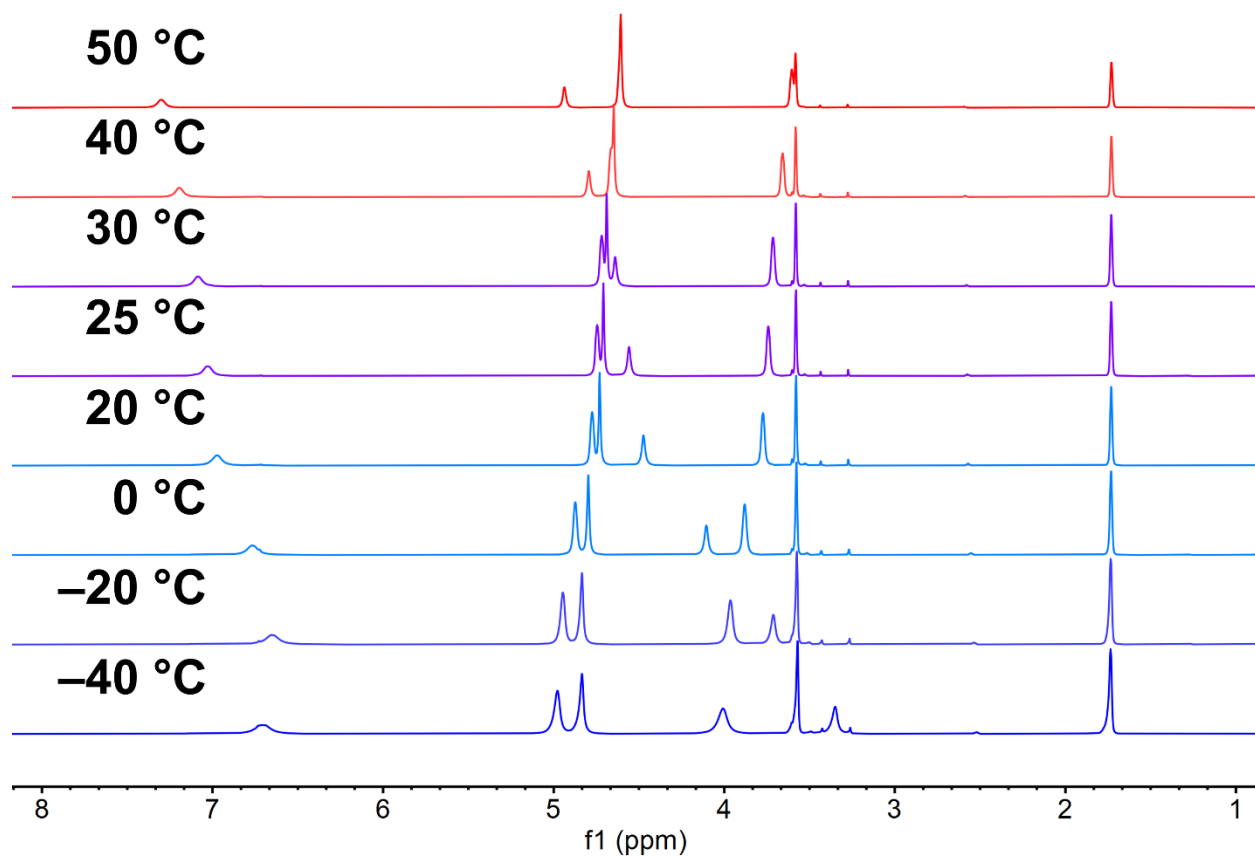

**Figure S36.** Variable-temperature <sup>1</sup>H NMR spectra of [K(crypt-222)][U(dbCOT)<sub>2</sub>], **2**, from 1 to 8 ppm in THF-*d*<sub>8</sub> obtained with a 500 MHz spectrometer.

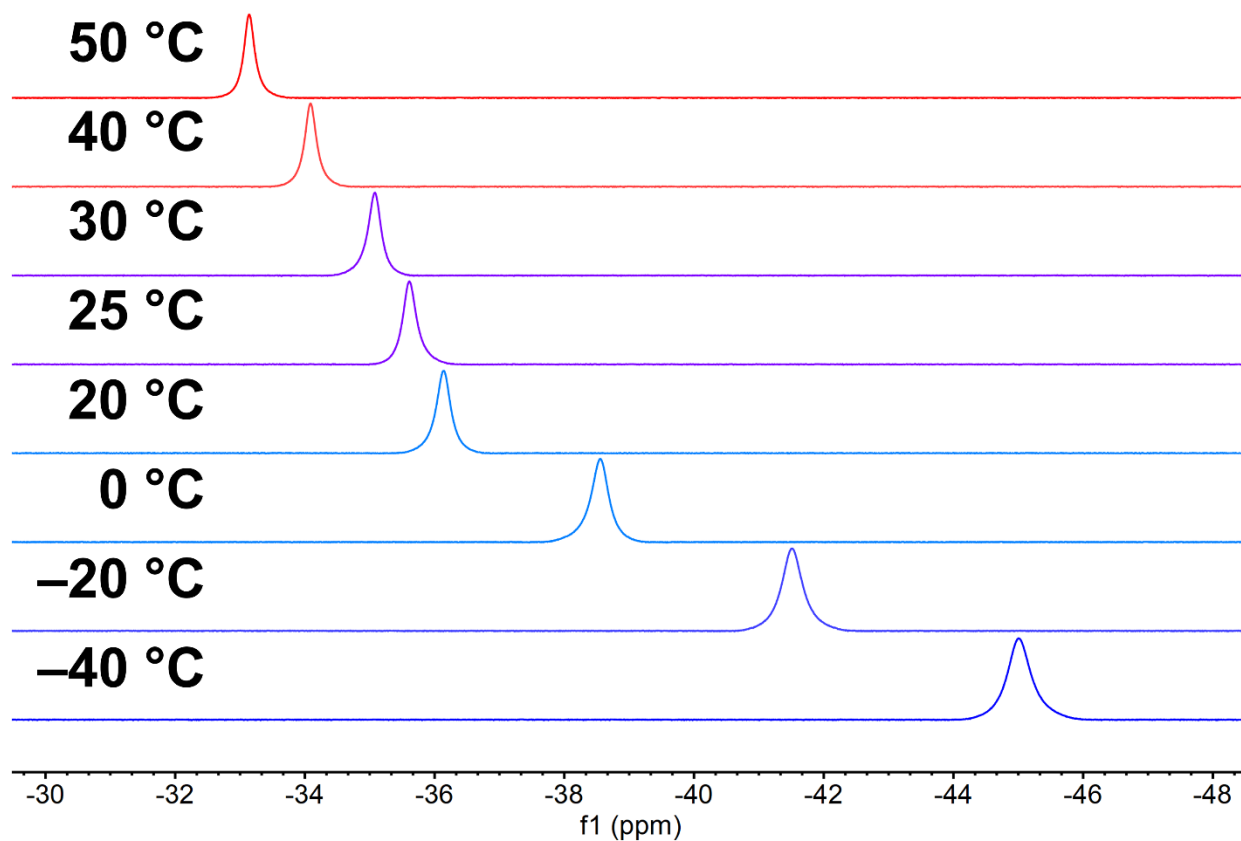

**Figure S37.** Variable-temperature <sup>1</sup>H NMR spectra of [K(crypt-222)][U(dbCOT)<sub>2</sub>], **2**, from -30 to -48 ppm in THF-*d*<sub>8</sub> obtained with a 500 MHz spectrometer.

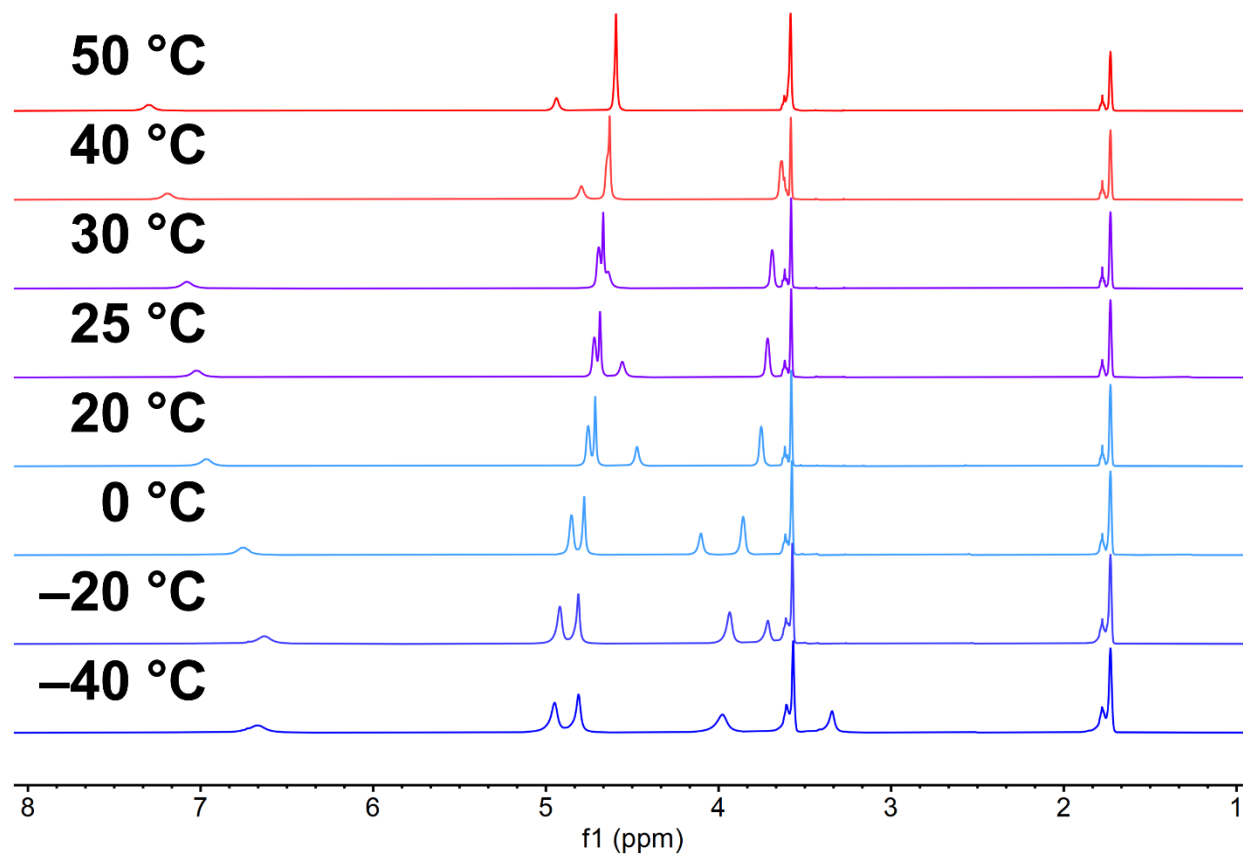

**Figure S38.** Variable-temperature  $^1\text{H}$  NMR spectra of  $[\text{K}(\text{crypt-222})][\text{U}(\text{dbCOT})_2(\text{THF})]$ , **3**, from 1 to 8 ppm in  $\text{THF-}d_8$  obtained with a 500 MHz spectrometer.

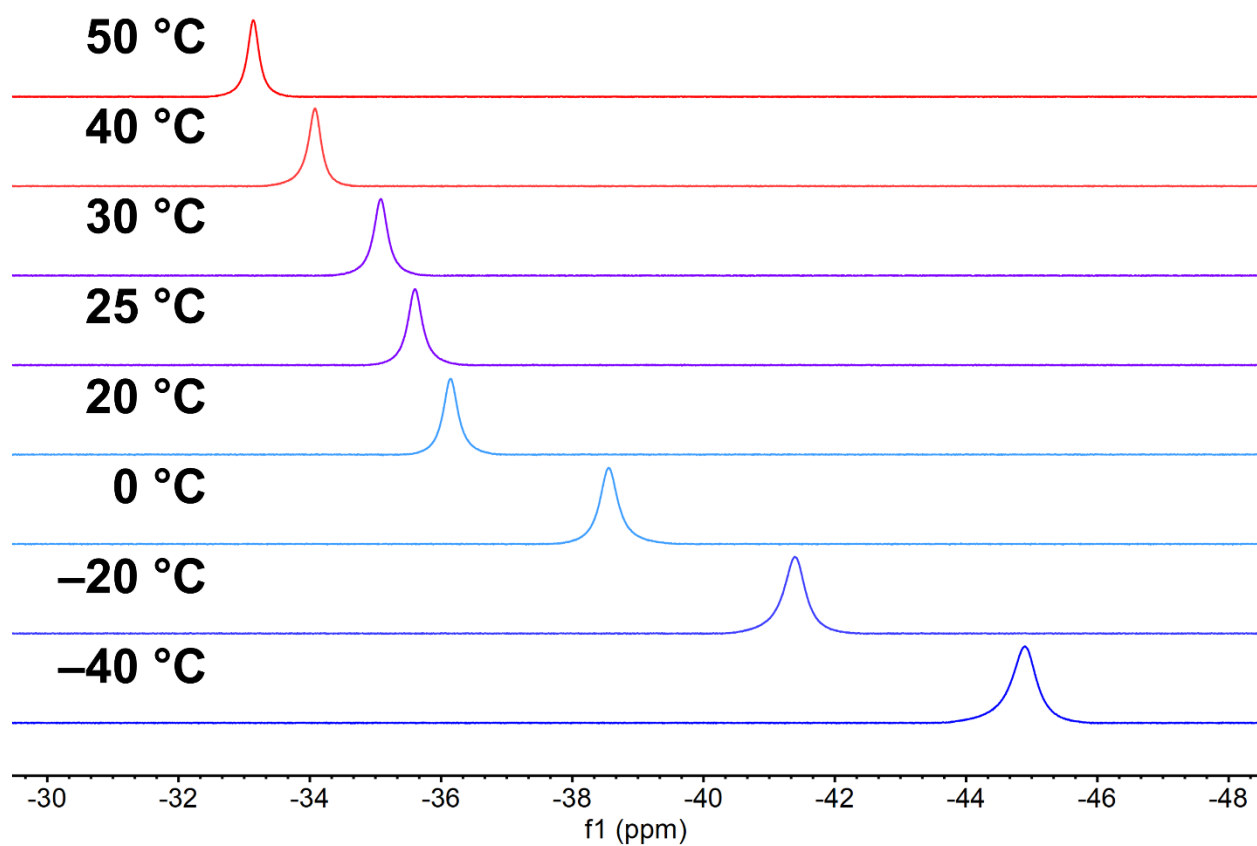

**Figure S39.** Variable-temperature <sup>1</sup>H NMR spectra of [K(crypt-222)][U(dbCOT)<sub>2</sub>(THF)], **3**, from -30 to -48 ppm in THF-*d*<sub>8</sub> obtained with a 500 MHz spectrometer.

### 3 UV-Vis-NIR Spectroscopy

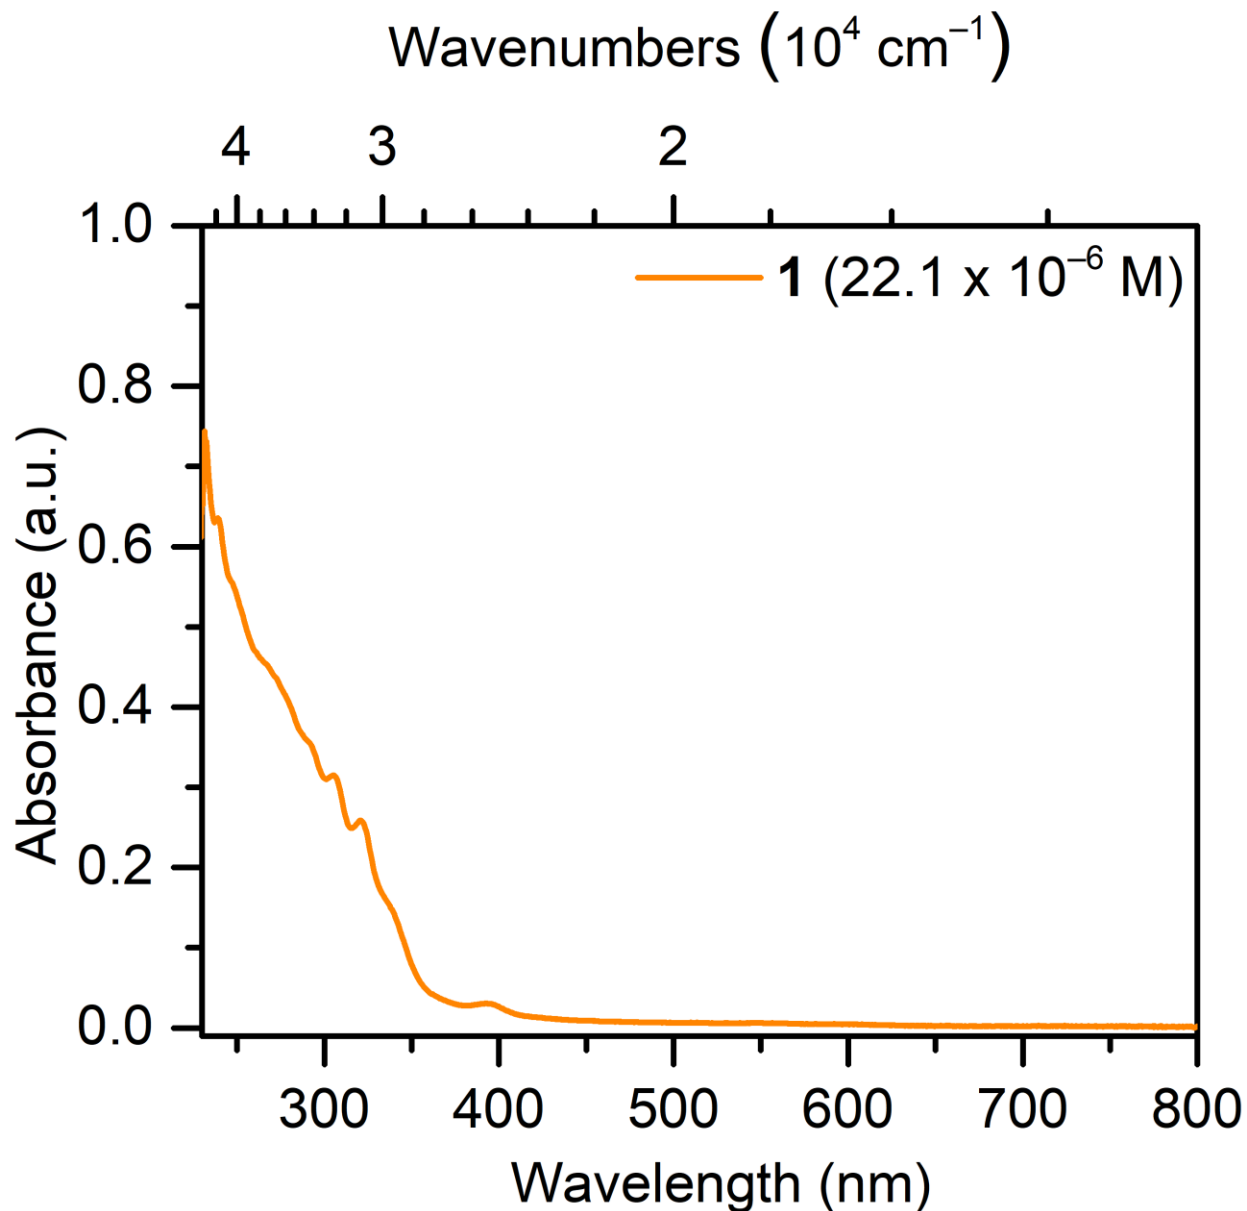

**Figure S40.** UV-Vis spectrum of  $[\text{K}(\text{DME})_2][\text{U}(\text{dbCOT})_2]$ , **1**, taken in 2-MeTHF at  $22.1 \times 10^{-6} \text{ mol/L}$ .



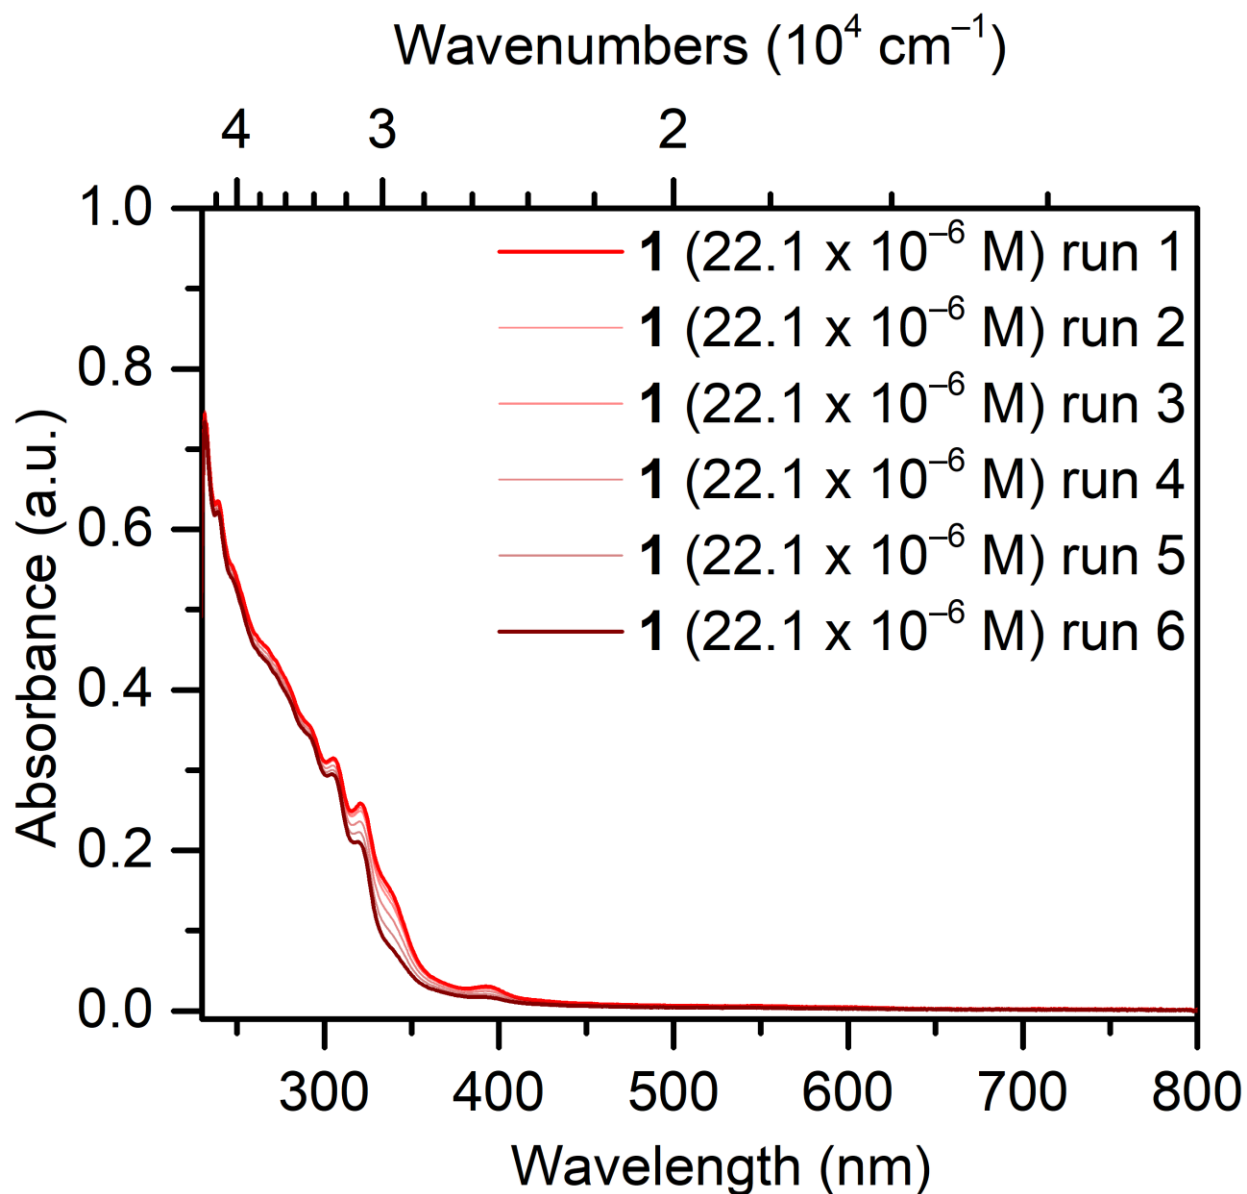

**Figure S41.** UV-Vis spectra of  $[\text{K}(\text{DME})_2][\text{U}(\text{dbCOT})_2]$ , **1**, taken in 2-MeTHF at  $22.1 \times 10^{-6}$  mol/L over the course of six scans.

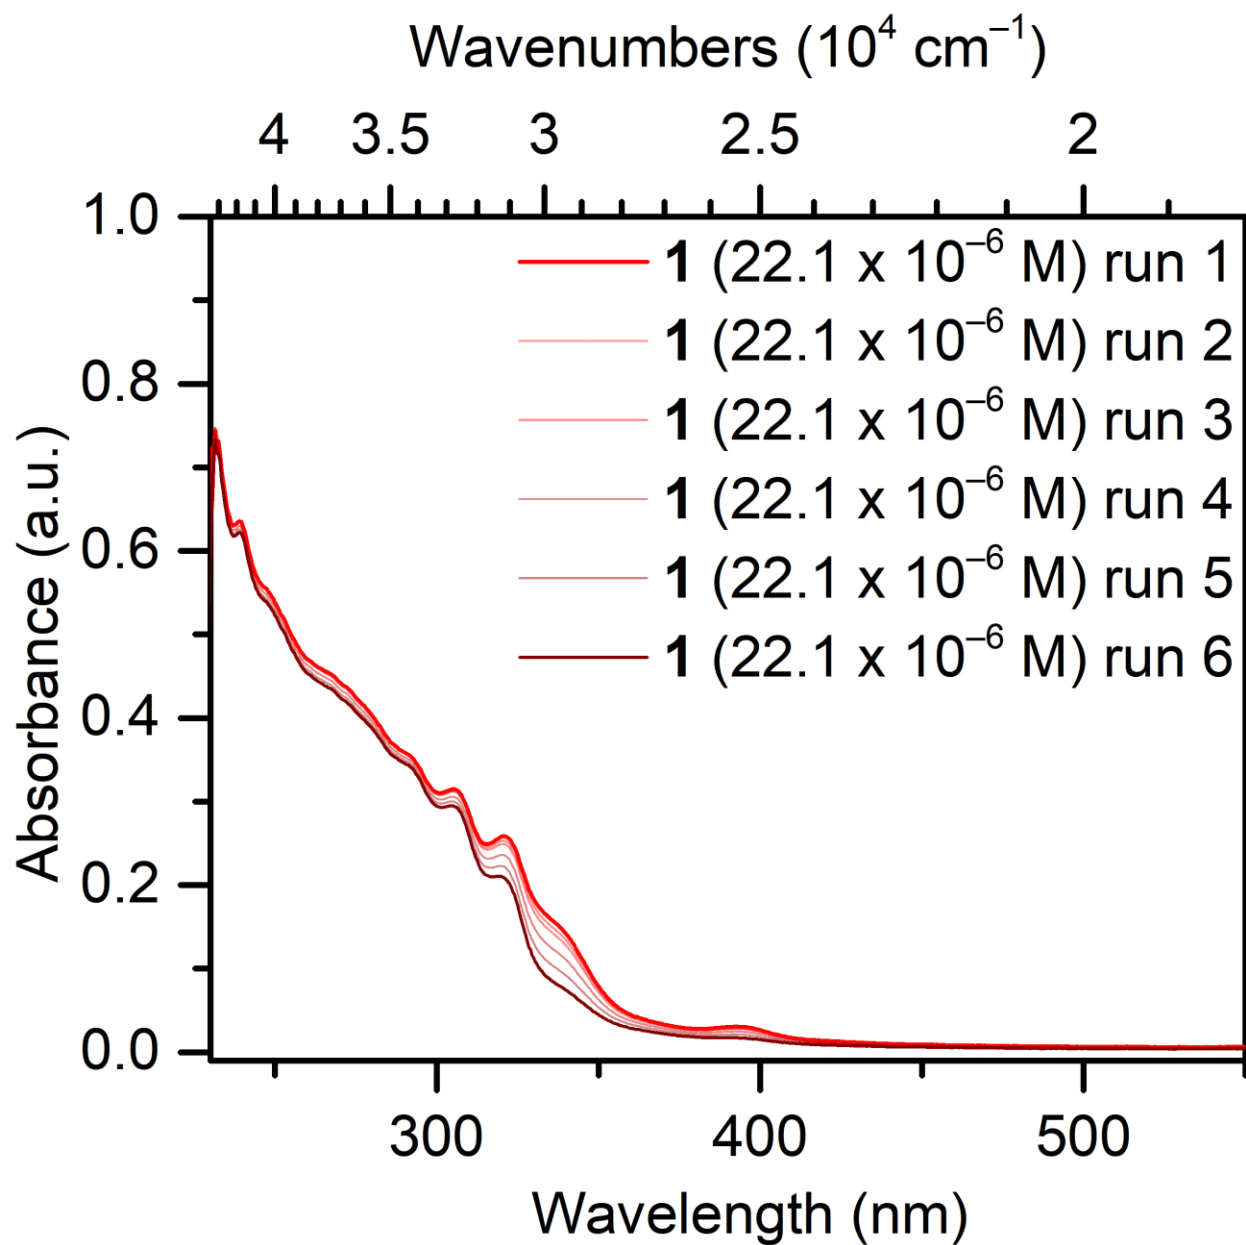

**Figure S42.** Magnification of the UV-Vis spectra of  $[\text{K}(\text{DME})_2][\text{U}(\text{dbCOT})_2]$ , **1**, taken in 2-MeTHF at  $22.1 \times 10^{-6}$  mol/L over the course of six scans.

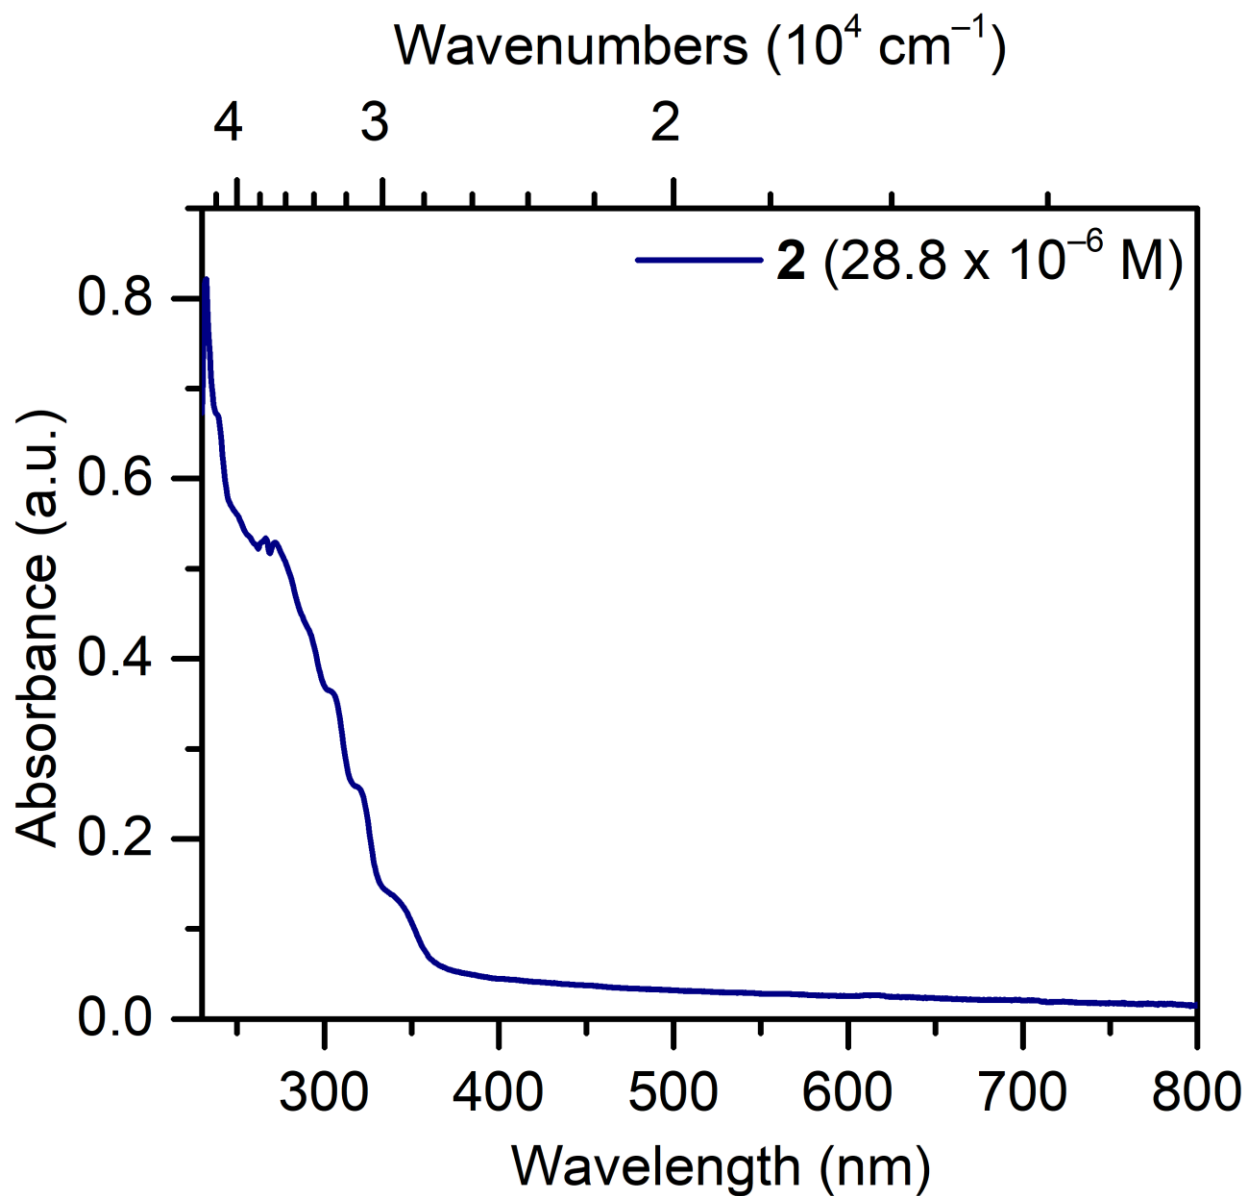

**Figure S43.** UV-Vis spectrum of [K(crypt-222)][U(dbCOT)<sub>2</sub>], **2**, taken in 2-MeTHF at 28.8 x 10<sup>-6</sup> mol/L.

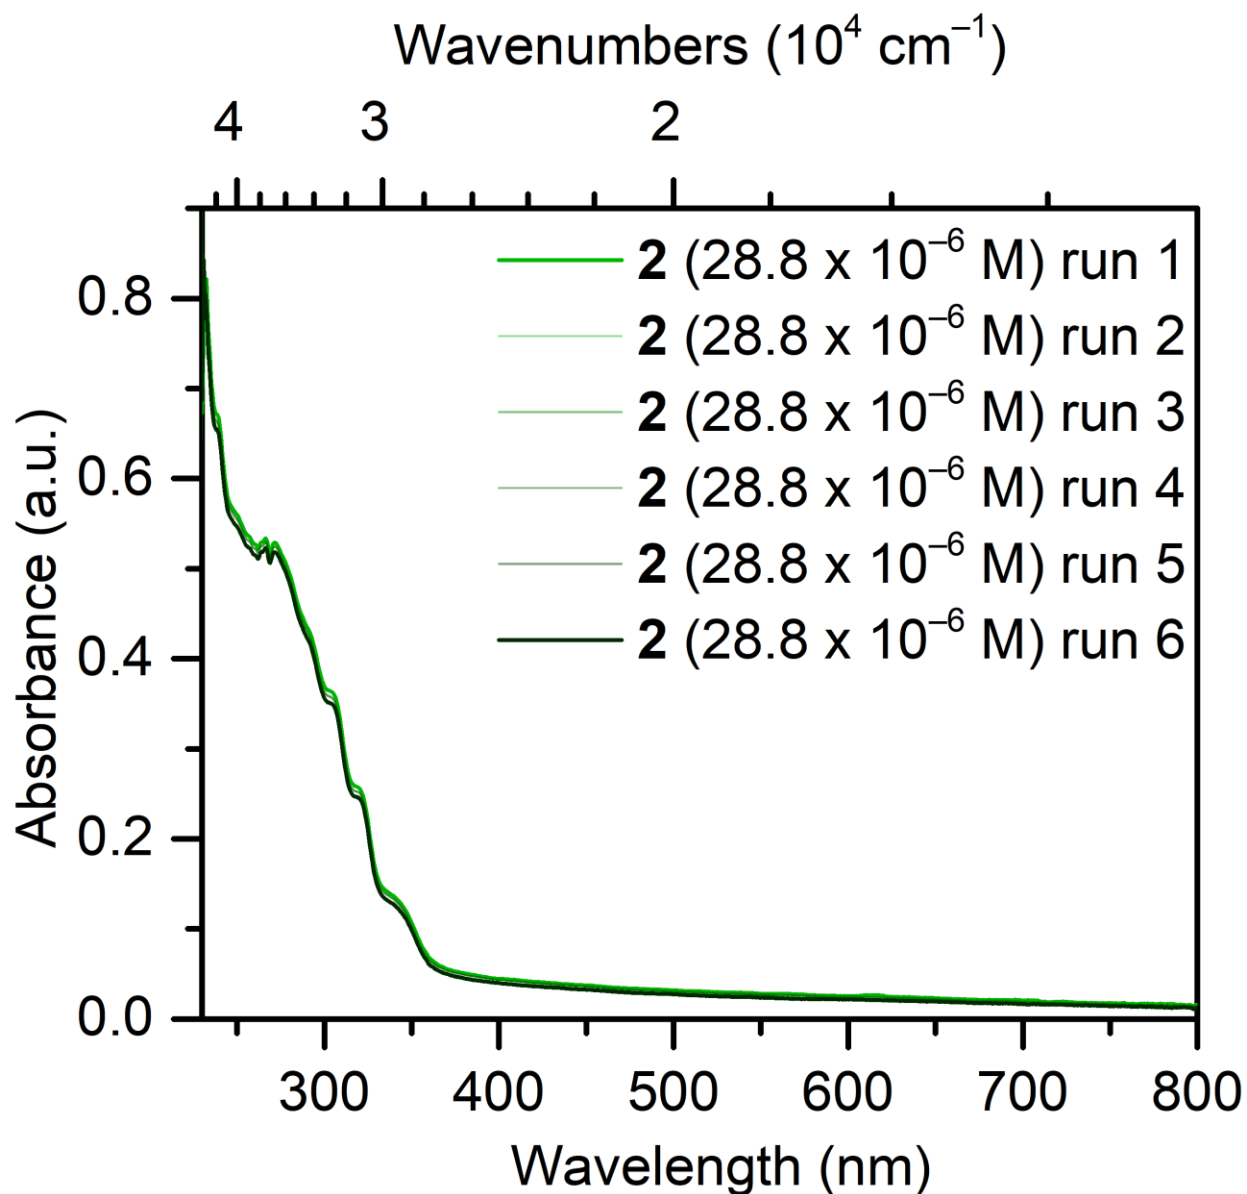

**Figure S44.** UV-Vis spectra of  $[\text{K}(\text{crypt-222})][\text{U}(\text{dbCOT})_2]$ , **2**, taken in 2-MeTHF at  $28.8 \times 10^{-6}$  mol/L over the course of six scans.

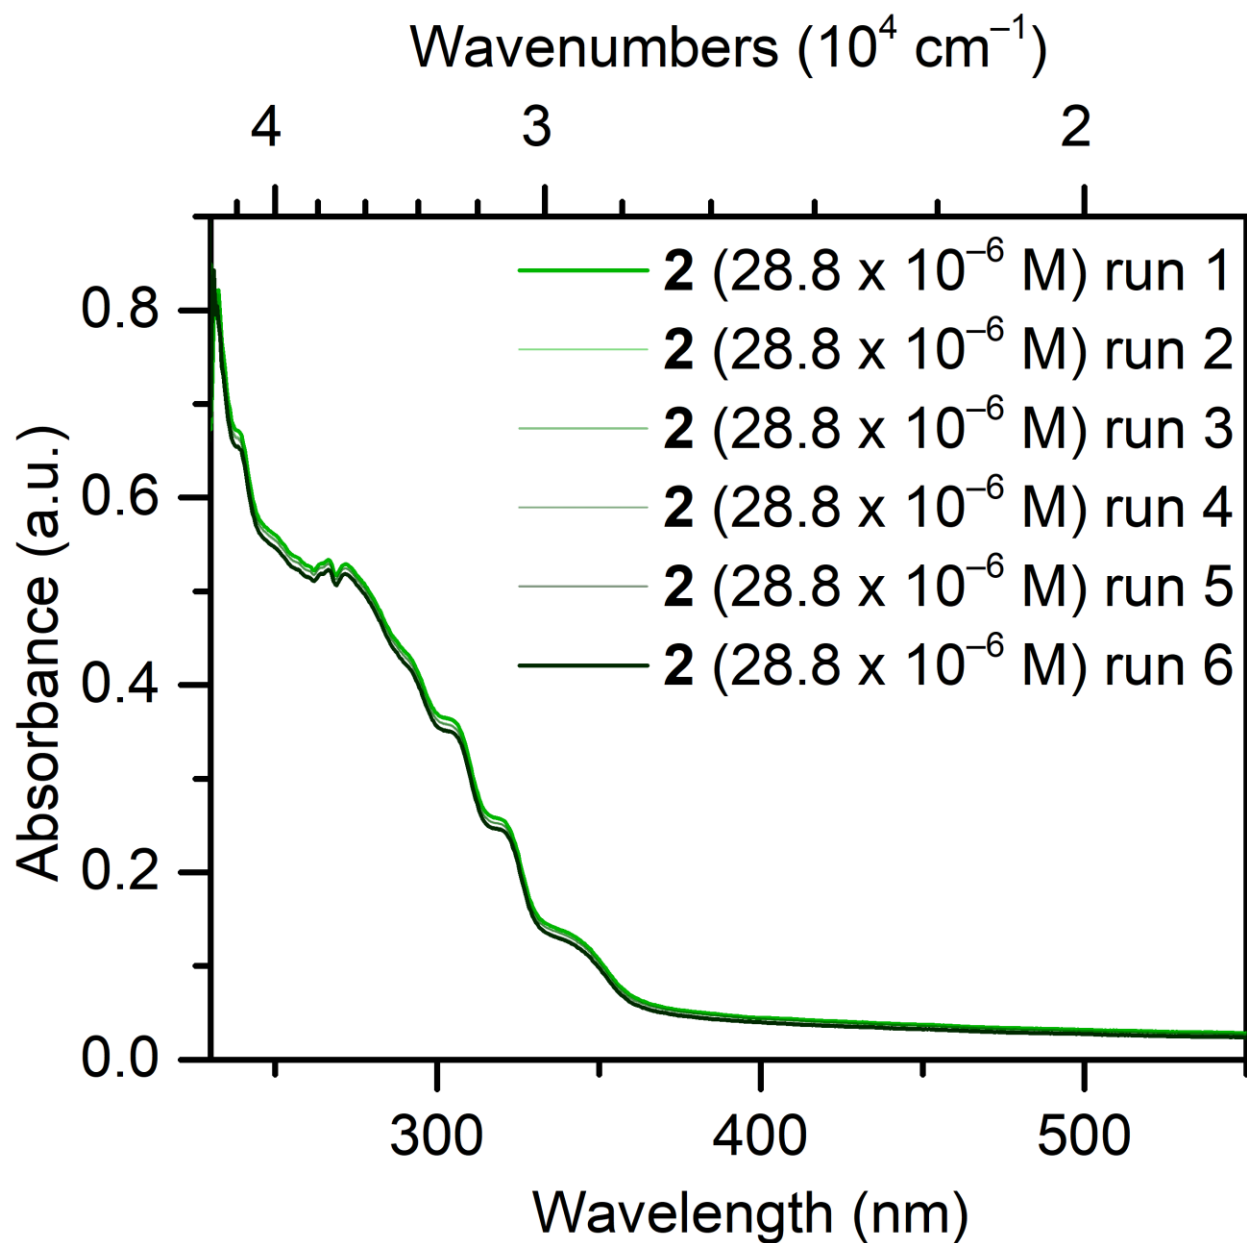

**Figure S45.** Magnification of the UV-Vis spectra of  $[\text{K}(\text{crypt-222})][\text{U}(\text{dbCOT})_2]$ , **2**, taken in 2-MeTHF at  $28.8 \times 10^{-6}$  mol/L over the course of six scans.

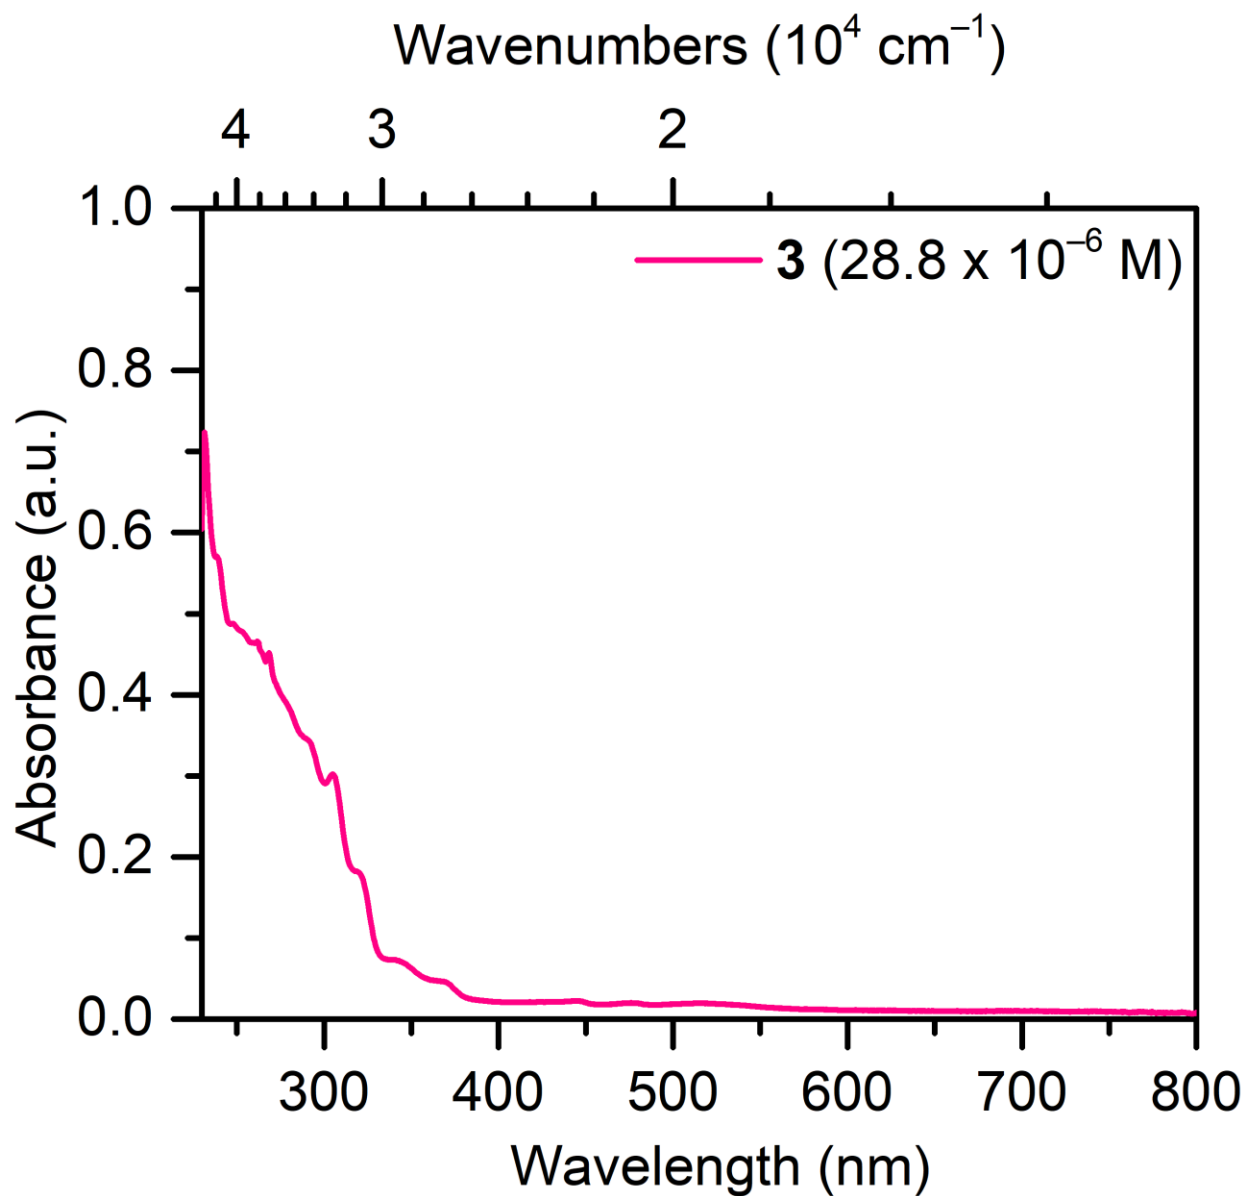

**Figure S46.** UV-Vis spectrum of  $\text{K}(\text{crypt-222})[\text{U}(\text{dbCOT})_2(\text{THF})]$ , **3**, taken in 2-MeTHF at  $25.0 \times 10^{-6} \text{ mol/L}$ .

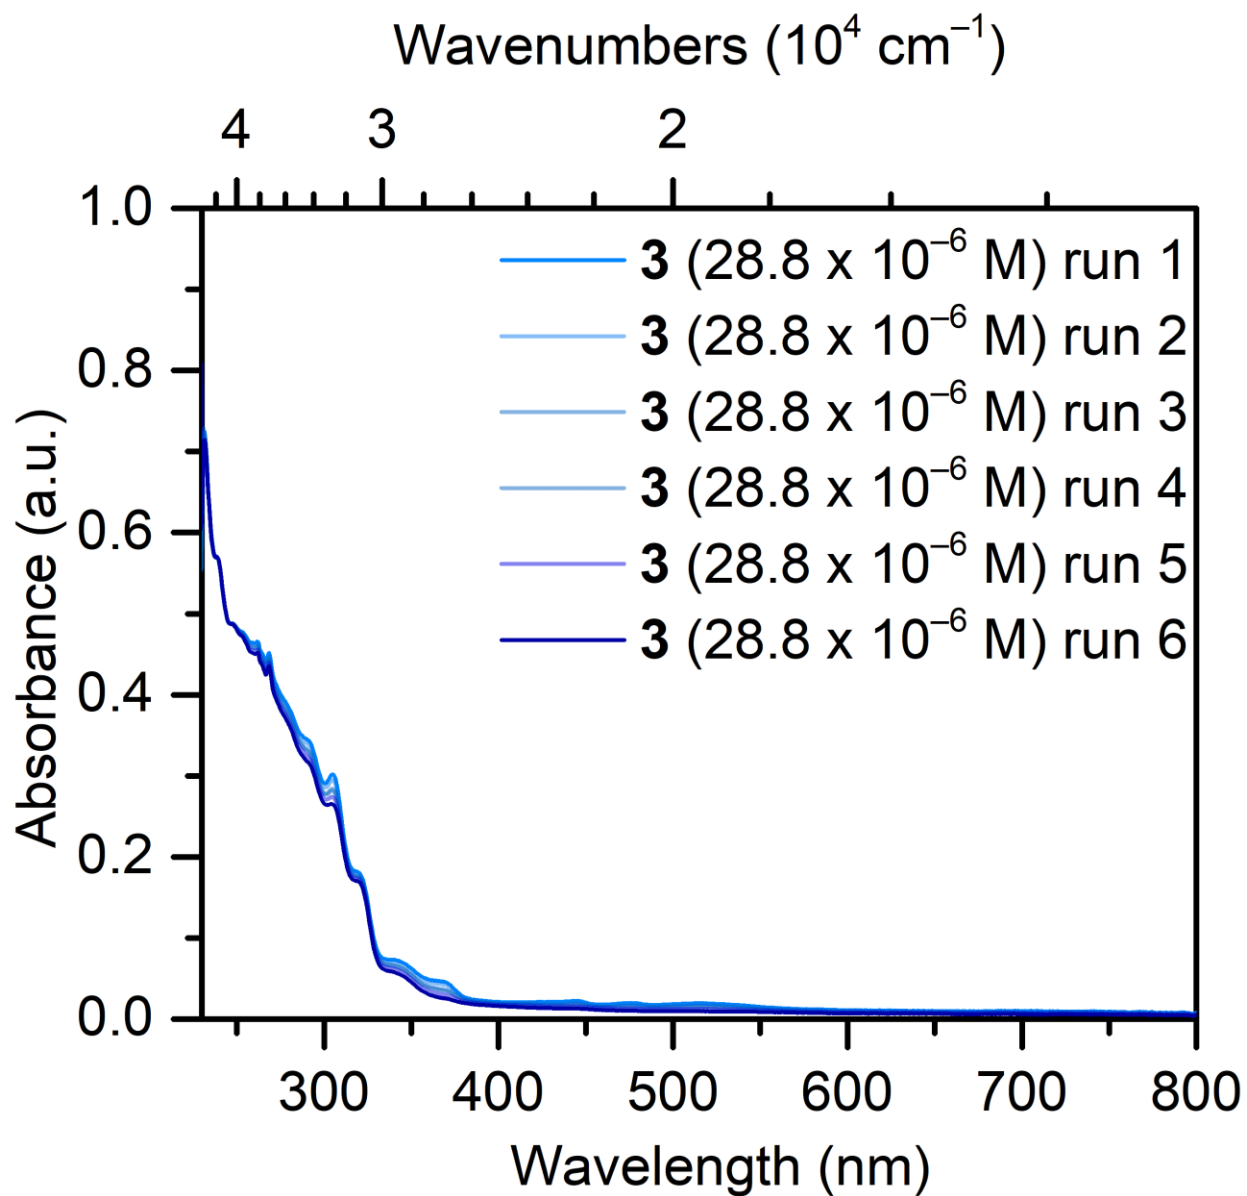

**Figure S47.** UV-Vis spectra of  $[\text{K}(\text{crypt-222})][\text{U}(\text{dbCOT})_2(\text{THF})]$ , **3**, taken in 2-MeTHF at  $25.0 \times 10^{-6}$  mol/L over the course of six scans.

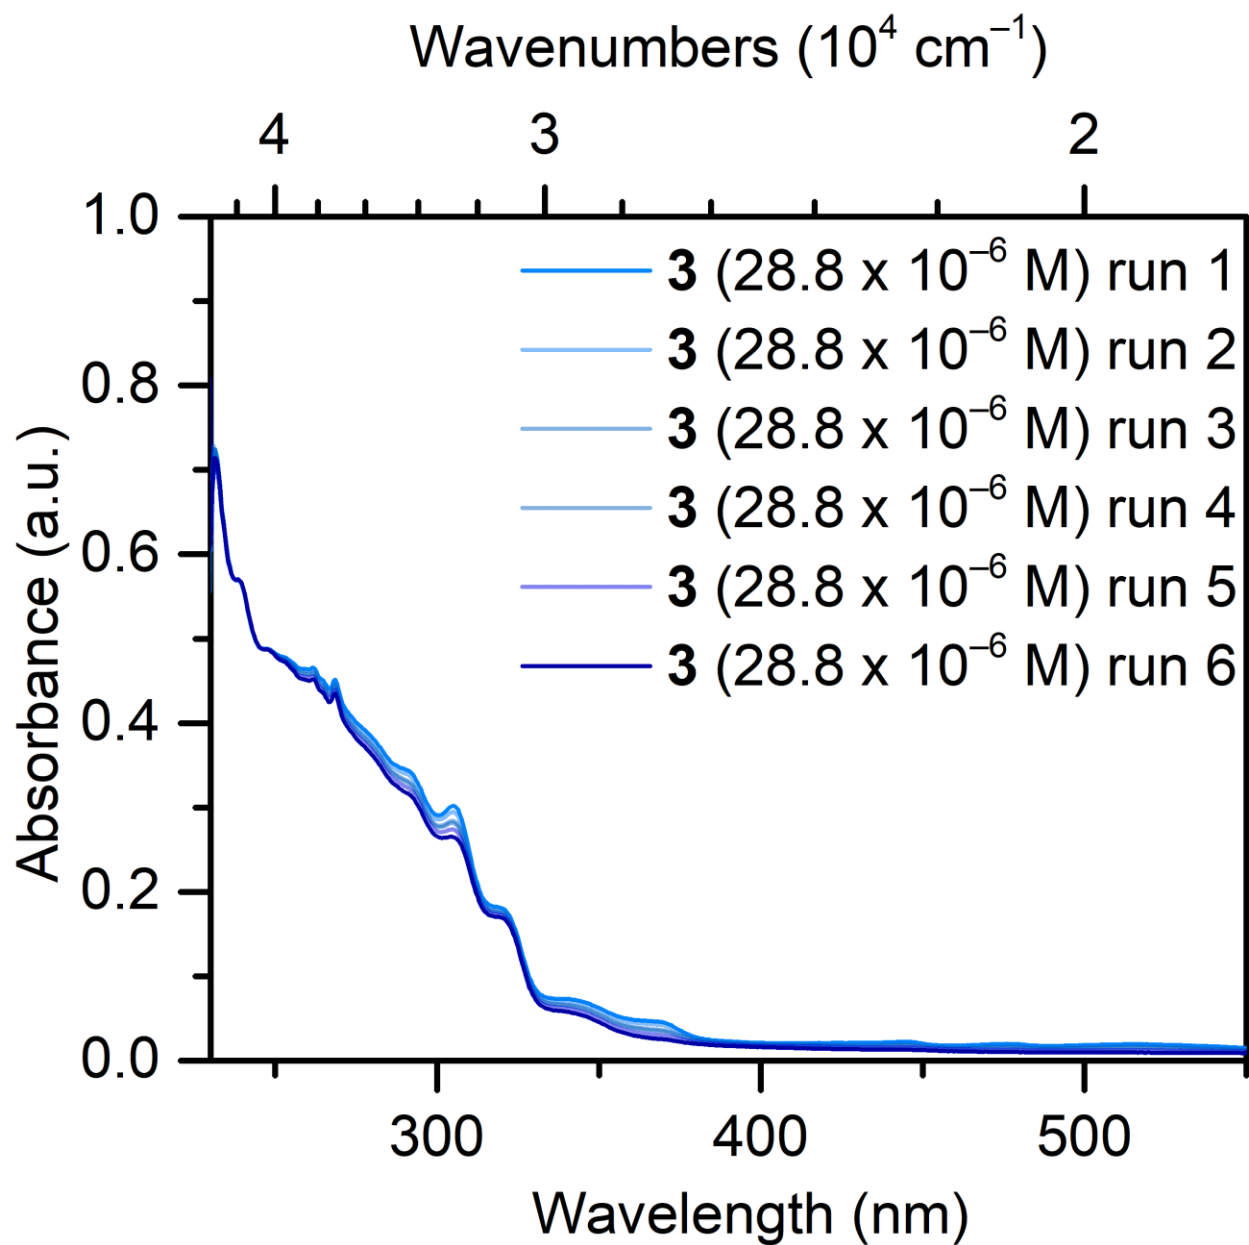

**Figure S48.** Magnification of the UV-Vis spectra of [K(crypt-222)][U(dbCOT)<sub>2</sub>(THF)], **3**, taken in 2-MeTHF at 25.0 x 10<sup>-6</sup> mol/L over the course of six scans.



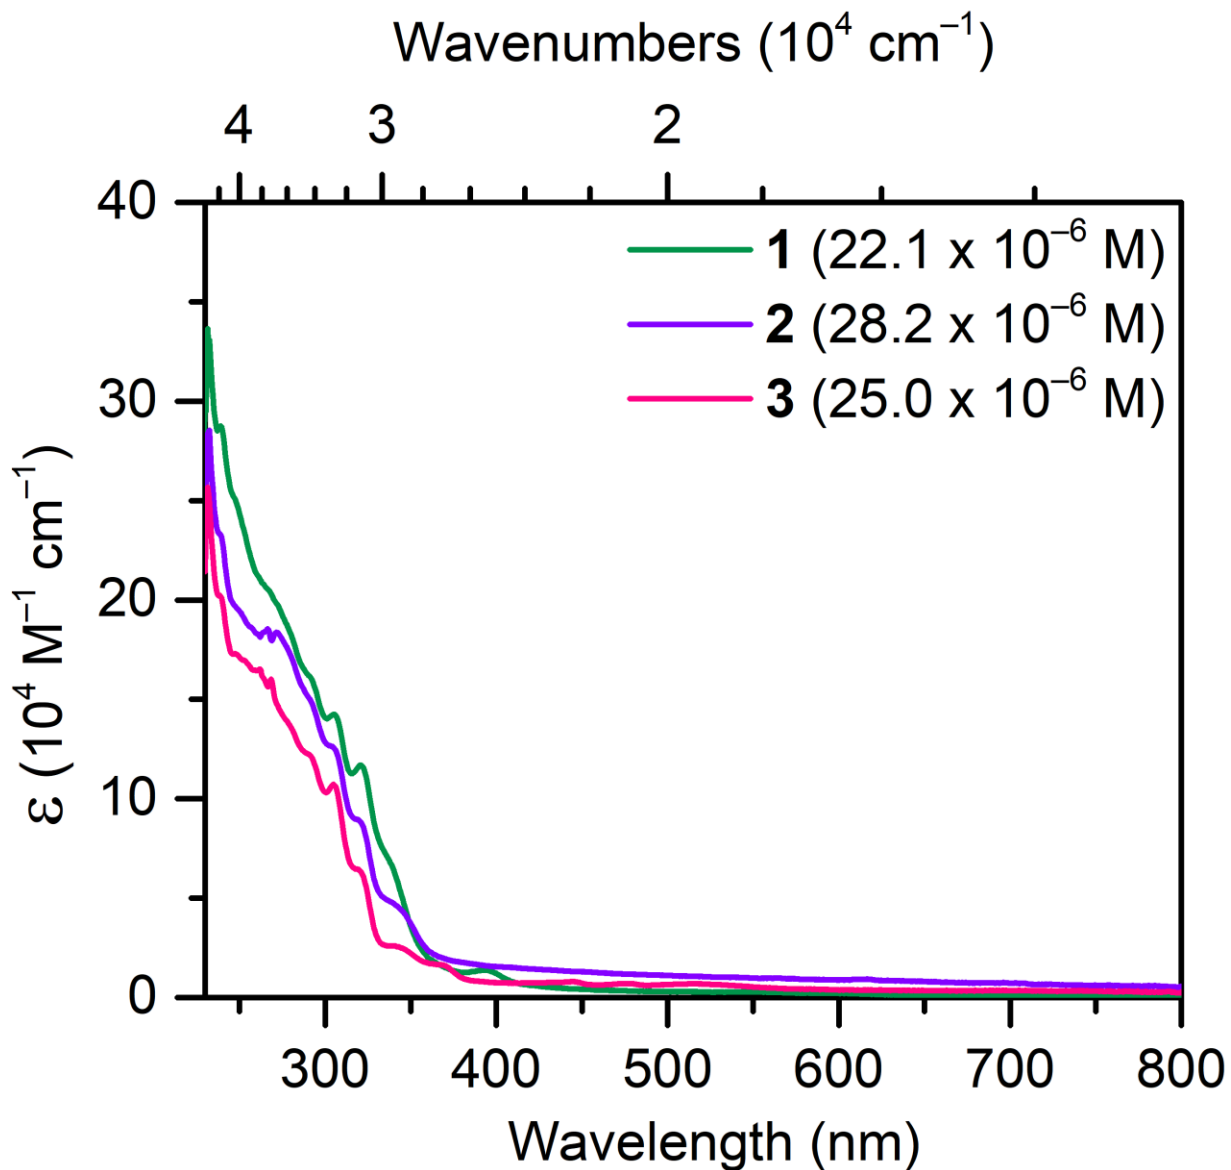

**Figure S49.** UV-Vis spectra of  $[\text{K}(\text{DME})_2][\text{U}(\text{dbCOT})_2]$ , **1** (green line),  $[\text{K}(\text{crypt-222})][\text{U}(\text{dbCOT})_2]$ , **2** (purple line), and  $[\text{K}(\text{crypt-222})][\text{U}(\text{dbCOT})_2(\text{THF})]$ , **3** (pink line), taken in 2-MeTHF at  $22.1 \times 10^{-6} \text{ mol/L}$ ,  $28.2 \times 10^{-6} \text{ mol/L}$ , and  $25.0 \times 10^{-6} \text{ mol/L}$ , respectively.

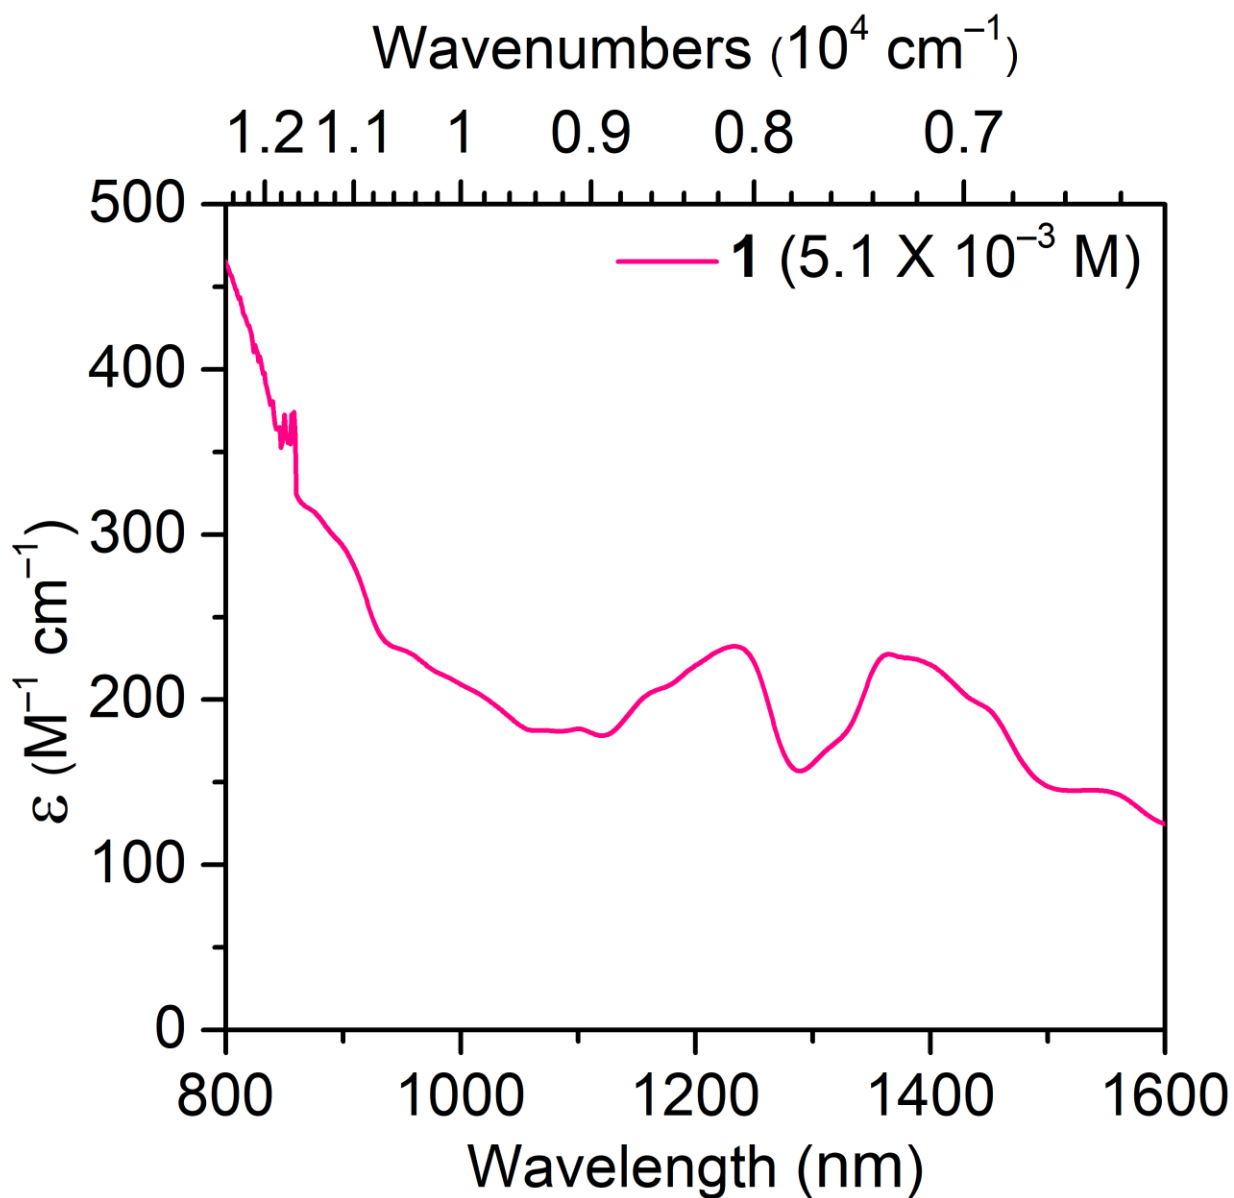

**Figure S50.** NIR spectrum of  $[\text{K}(\text{DME})_2][\text{U}(\text{dbCOT})_2]$ , 1, taken in 2-MeTHF at  $5.1 \times 10^{-3}$  mol/L.

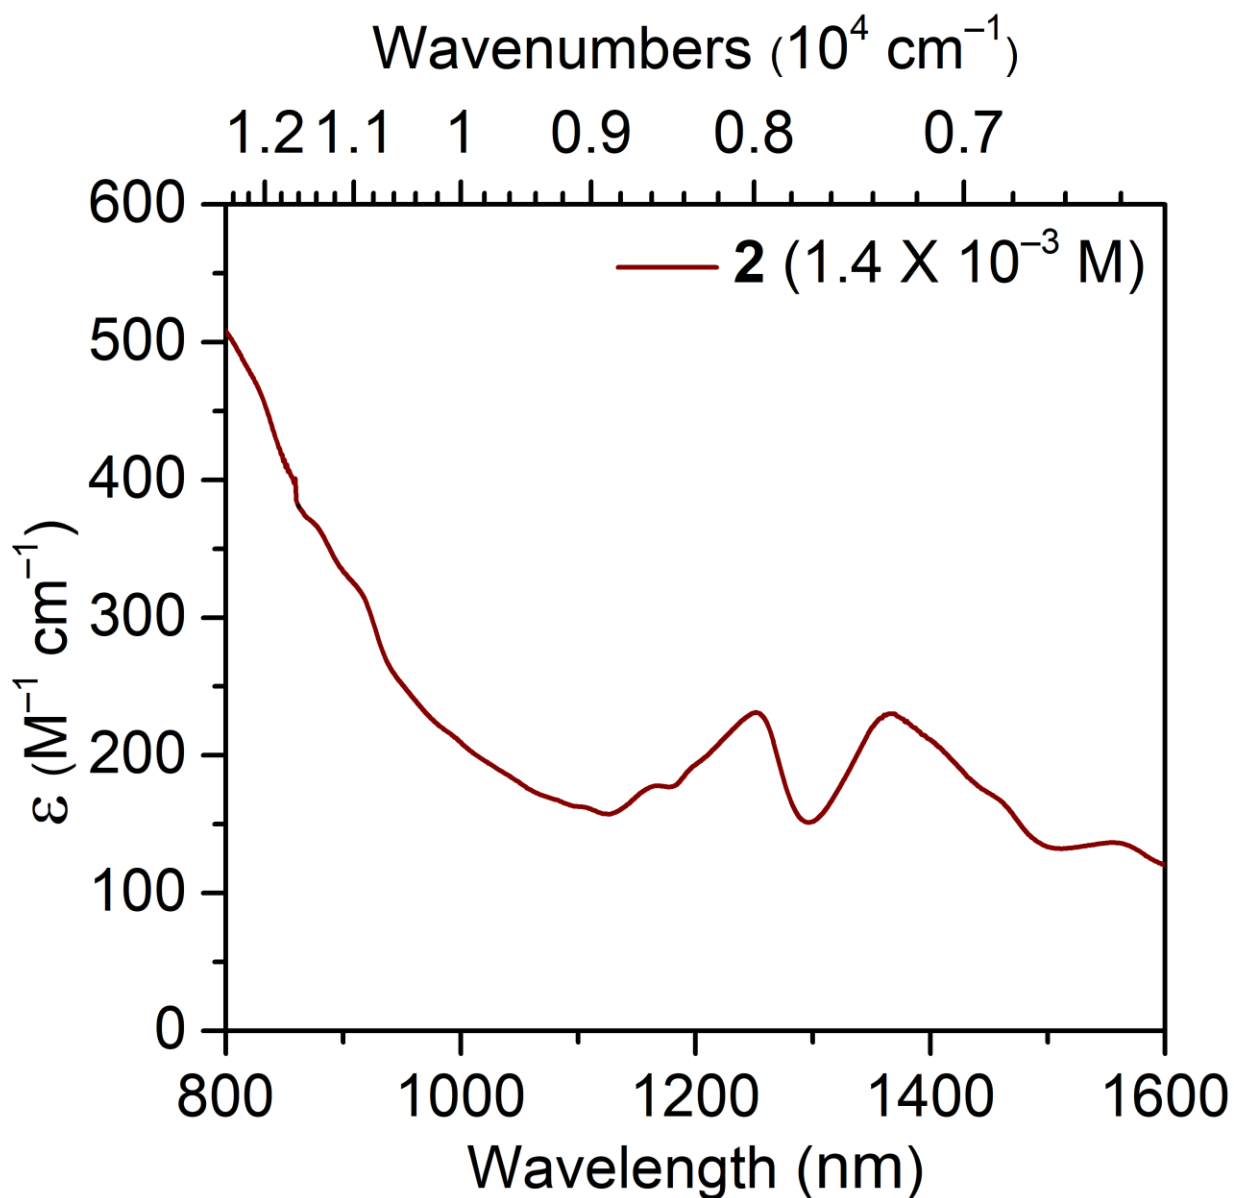

**Figure S51.** NIR spectrum of  $[\text{K}(\text{crypt-222})][\text{U}(\text{dbCOT})_2]$ , **2**, taken in 2-MeTHF at  $1.4 \times 10^{-3} \text{ mol/L}$ .

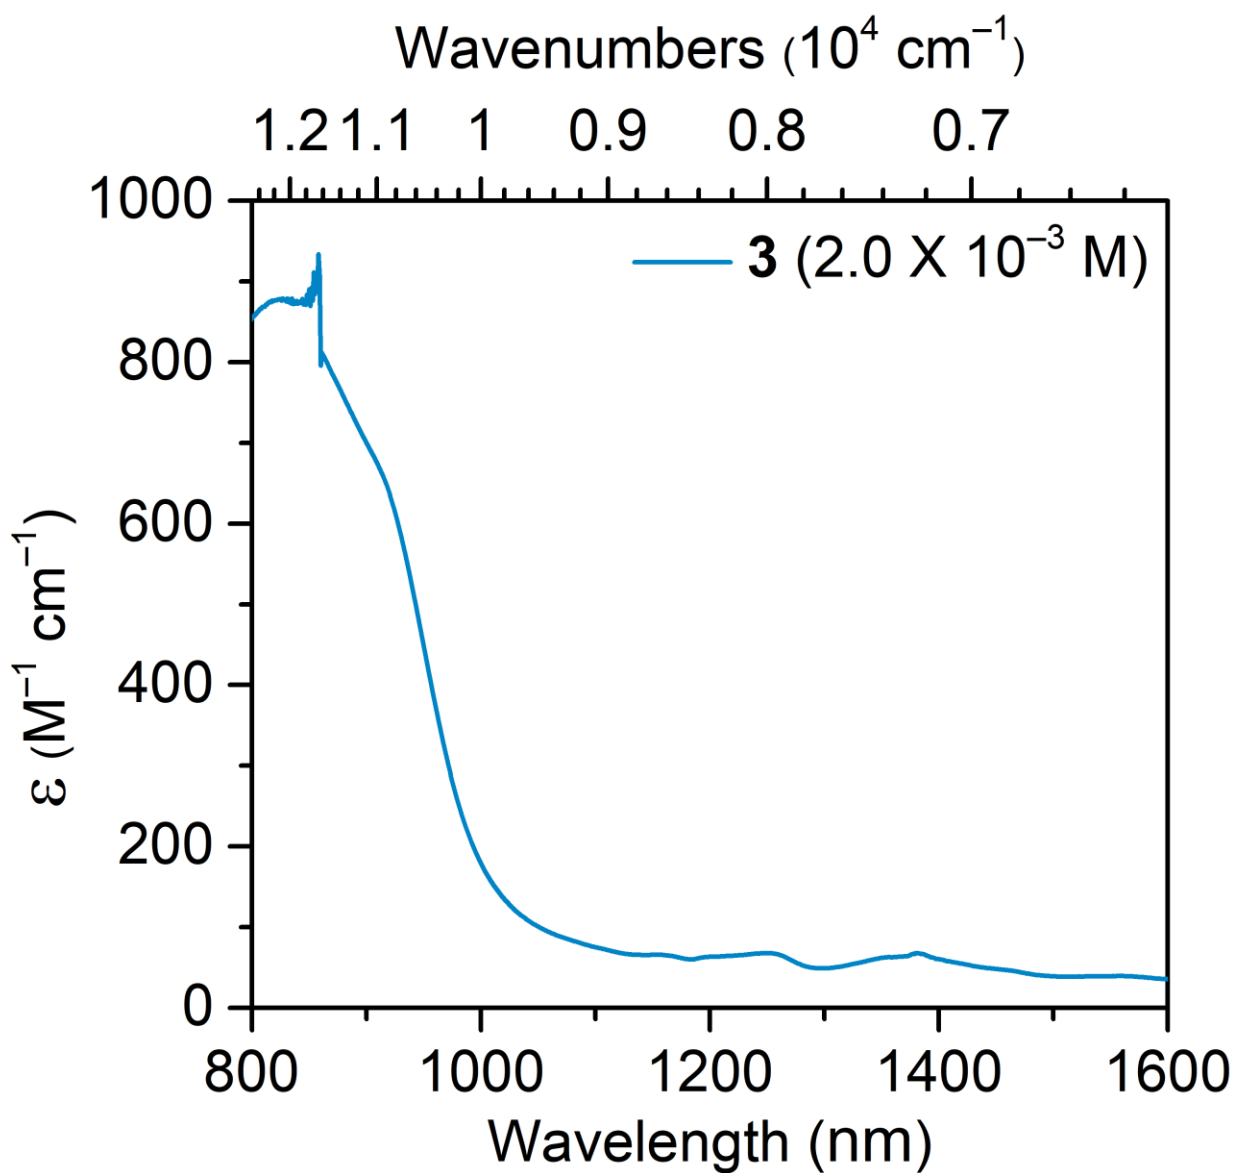

**Figure S52.** NIR spectrum of  $[\text{K}(\text{crypt-222})][\text{U}(\text{dbCOT})_2(\text{THF})]$ , **3**, taken in 2-MeTHF at  $2.0 \times 10^{-3} \text{ mol/L}$ .

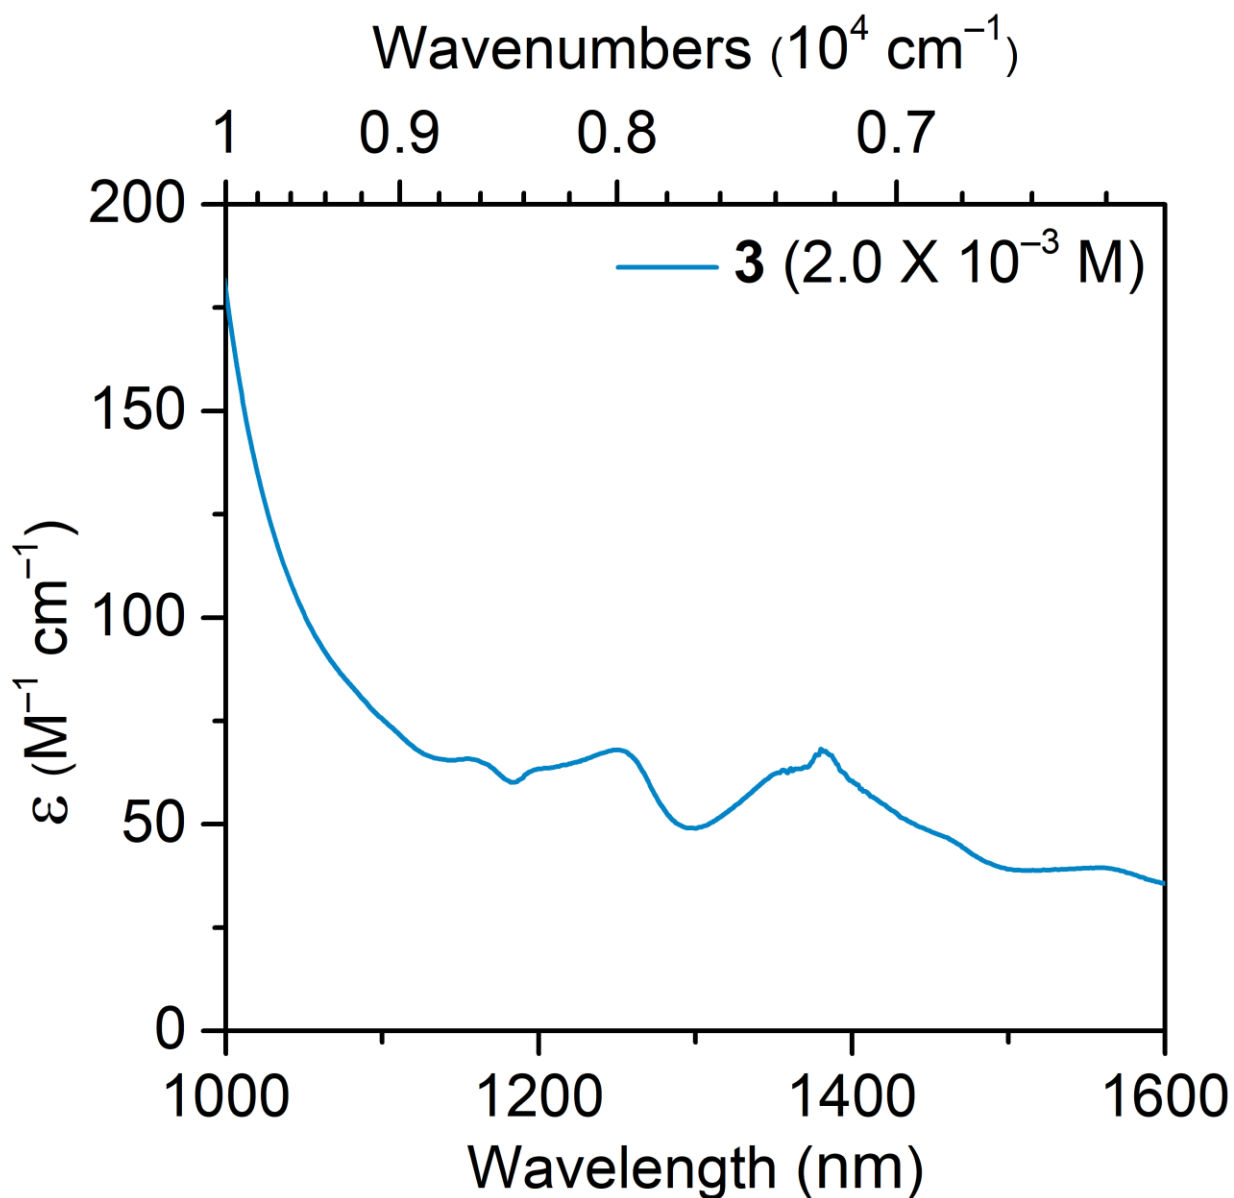

**Figure S53.** Magnification of the NIR spectrum of  $[\text{K}(\text{crypt-222})][\text{U}(\text{dbCOT})_2(\text{THF})]$ , **3**, taken in 2-MeTHF at  $2.0 \times 10^{-3} \text{ mol/L}$ .

#### 4 IR Spectroscopy

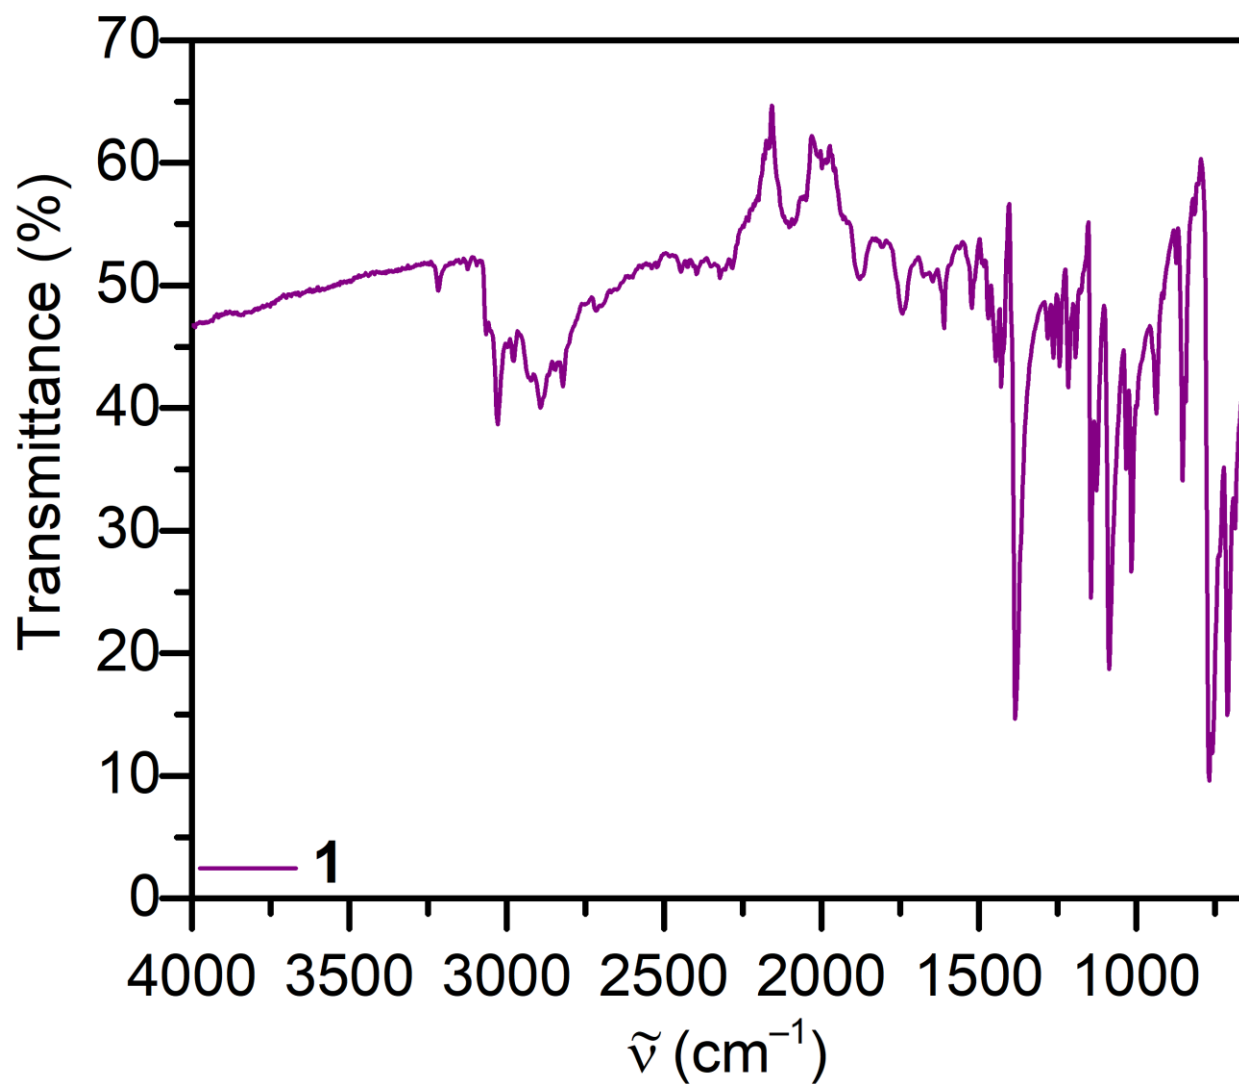

**Figure S54.** FTIR spectrum of  $[\text{K}(\text{DME})_2][\text{U}(\text{dbCOT})_2]$ , **1**, collected on crushed crystalline solids under a nitrogen atmosphere.

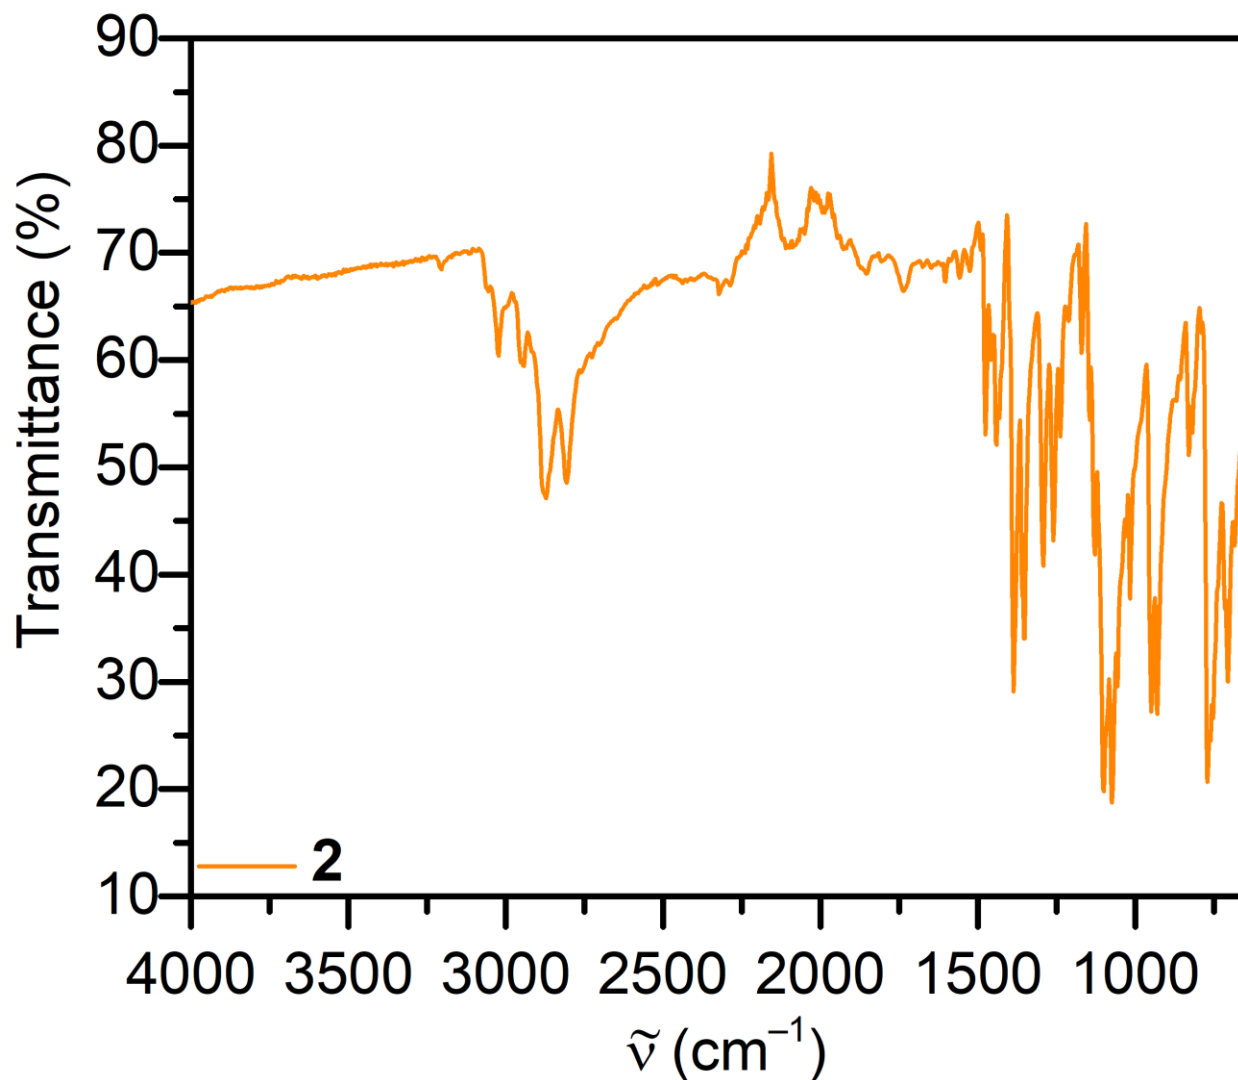

**Figure S55.** FTIR spectrum of [K(crypt-222)][U(dbCOT)<sub>2</sub>], **2**, collected on crushed crystalline solids under a nitrogen atmosphere.

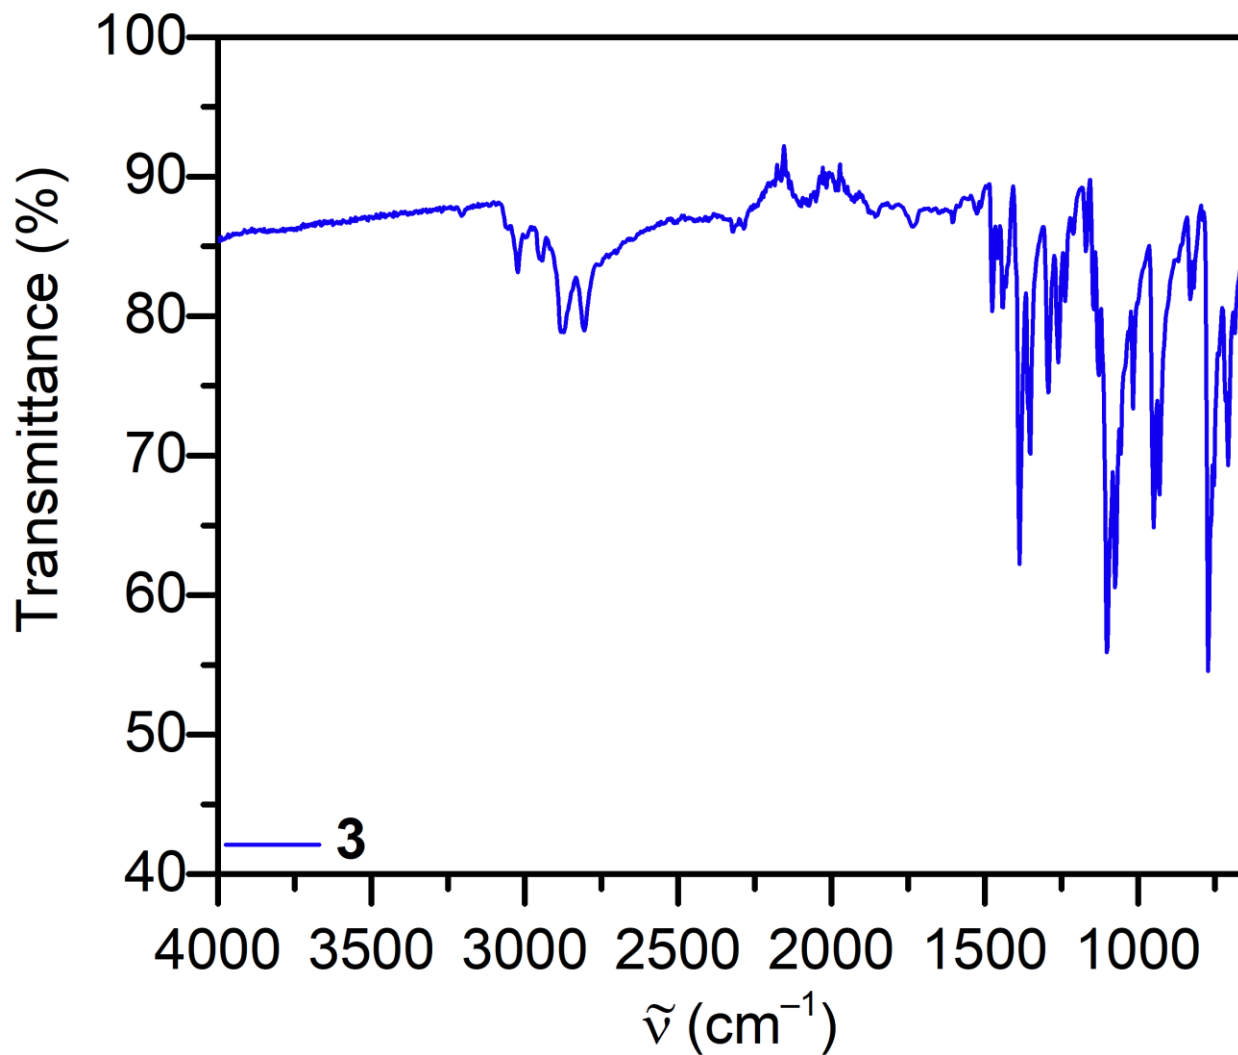

**Figure S56.** FTIR spectrum of [K(crypt-222)][U(dbCOT)<sub>2</sub>(THF)], **3**, collected on crushed crystalline solids under a nitrogen atmosphere.



## 5 DFT Calculations

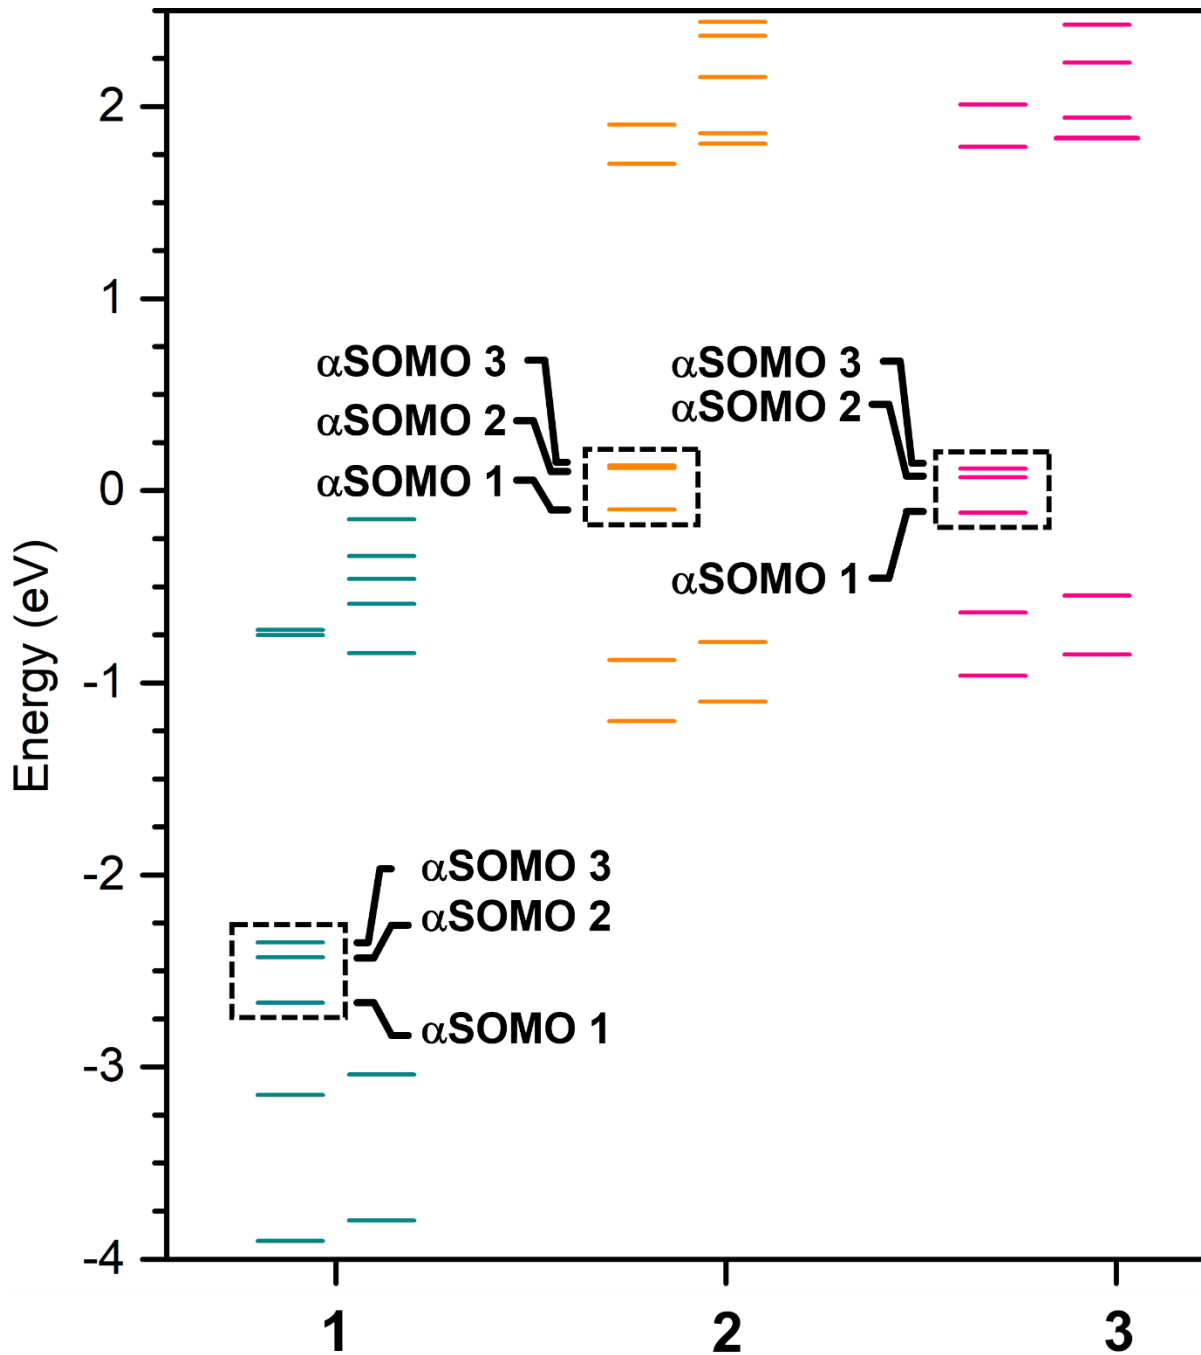

**Figure S57.** The calculated frontier alpha ( $\alpha$ ) and beta ( $\beta$ ) spin orbital energies of the optimized structures of  $[\text{K}(\text{DME})_2][\text{U}(\text{dbCOT})_2]$ , **1** (teal lines), as well as the  $[\text{U}(\text{dbCOT})_2]^-$  anions in  $[\text{K}(\text{crypt-222})][\text{U}(\text{dbCOT})_2]$ , **2** (orange lines), and  $[\text{K}(\text{crypt-222})][\text{U}(\text{dbCOT})_2(\text{THF})]$ , **3** (pink lines), respectively. The three  $\alpha$ -spin singly occupied molecular orbitals ( $\alpha$ SOMO) are highlighted for each complex. Energy levels are shown to scale.

**Table S5.** Spin polarization difference in the calculated frontier alpha ( $\alpha$ ) and beta ( $\beta$ ) spin orbital energies of the optimized structures of [K(DME)<sub>2</sub>][U(dbCOT)<sub>2</sub>], **1**, as well as the [U(dbCOT)<sub>2</sub>]<sup>-</sup> anions in [K(crypt-222)][U(dbCOT)<sub>2</sub>], **2**, and [K(crypt-222)][U(dbCOT)<sub>2</sub>(THF)], **3**, respectively.

|          | Orbital         | $\alpha$ SOMO<br>E (eV) | $\beta$ SOMO<br>E (eV) | $\Delta$ E |
|----------|-----------------|-------------------------|------------------------|------------|
| <b>1</b> | $\alpha$ SOMO 1 | -2.6649                 | -0.8452                | 1.8197     |
|          | $\alpha$ SOMO 2 | -2.4290                 | -0.5892                | 1.8398     |
|          | $\alpha$ SOMO 3 | -2.3509                 | -0.4598                | 1.8911     |
| <b>2</b> | $\alpha$ SOMO 1 | -0.0992                 | 1.8068                 | 1.906      |
|          | $\alpha$ SOMO 2 | 0.1171                  | 1.8592                 | 1.7421     |
|          | $\alpha$ SOMO 3 | 0.1295                  | 2.1528                 | 2.0233     |
| <b>3</b> | $\alpha$ SOMO 1 | -0.1161                 | 1.8363                 | 1.9524     |
|          | $\alpha$ SOMO 2 | 0.0704                  | 1.9407                 | 1.8703     |
|          | $\alpha$ SOMO 3 | 0.1118                  | 2.2279                 | 2.1161     |

**Table S6.** Calculated percent contributions of natural bonding orbitals (NBOs) to the parent canonical molecular orbitals in the optimized structure of [K(DME)<sub>2</sub>][U(dbCOT)<sub>2</sub>], **1**.

| Orbital Number | Orbital Label   | NBO Composition | % Contribution |
|----------------|-----------------|-----------------|----------------|
| 207            | $\alpha$ HOMO-4 | U (LV)          | 9.5            |
|                |                 | C (LP)          | 12.7           |
|                |                 | C-C (BD*)       | 38.2           |
| 209            | $\alpha$ HOMO-2 | U (LV)          | 9.9            |
|                |                 | C (LP)          | 6.3            |
|                |                 | C-C (BD)        | 35.5           |
| 210            | $\alpha$ HOMO-1 | U (LV)          | 7.4            |
|                |                 | C-C (BD)        | 57.0           |
| 211            | $\alpha$ HOMO   | U (LV)          | 14.9           |
|                |                 | C-C (BD)        | 27.2           |
|                |                 | C-C (BD*)       | 32.0           |
| 212            | $\alpha$ SOMO 1 | U (LP)          | 89.7           |
| 213            | $\alpha$ SOMO 2 | U (LP)          | 85.1           |
| 214            | $\alpha$ SOMO 3 | U (LP)          | 93.1           |
| 215            | $\alpha$ LUMO   | U (LV)          | 18.8           |
|                |                 | C-C (BD*)       | 33.0           |
| 216            | $\alpha$ LUMO+1 | C-C (BD*)       | 51.8           |
| 217            | $\alpha$ LUMO+1 | K (LV)          | 24.1           |

BD = bonding orbital; BD\* = antibonding orbital; HOMO = highest occupied molecular orbital; LUMO = lowest unoccupied molecular orbital; LP = lone particle, LV = lone valence; NBO = natural bond orbital; SOMO = singly occupied molecular orbital.

**Table S7.** Calculated percent contributions of natural bonding orbitals (NBOs) to the parent canonical molecular orbitals in the optimized structure of the [U(dbCOT)<sub>2</sub>]<sup>-</sup> anion in [K(crypt-222)][U(dbCOT)<sub>2</sub>], **2**.

| Orbital Number | Orbital Label   | NBO Composition | % Contribution |
|----------------|-----------------|-----------------|----------------|
| 149            | $\alpha$ HOMO-3 | U (LV)          | 10.5           |
|                |                 | C-C (BD)        | 15.5           |
|                |                 | C-C (BD*)       | 32.8           |
| 150            | $\alpha$ HOMO-2 | U (LV)          | 8.0            |
|                |                 | C-C (BD)        | 16.7           |
|                |                 | C-C (BD*)       | 30.2           |
| 151            | $\alpha$ HOMO-1 | U (LV)          | 8.8            |
|                |                 | C-C (BD)        | 43.5           |
|                |                 | C-C (BD*)       | 12.7           |
| 152            | $\alpha$ HOMO   | U (LV)          | 14.6           |
|                |                 | C-C (BD)        | 16.1           |
|                |                 | C-C (BD*)       | 15.4           |
| 153            | $\alpha$ SOMO 1 | U (LP)          | 91.6           |
| 154            | $\alpha$ SOMO 2 | U (LP)          | 85.5           |
| 155            | $\alpha$ SOMO 3 | U (LP)          | 90.2           |
| 156            | $\alpha$ LUMO   | U (LV)          | 19.4           |
|                |                 | C-C (BD*)       | 36.9           |
| 157            | $\alpha$ LUMO+1 | U (LV)          | 24.3           |
|                |                 | C-C (BD*)       | 23.7           |

BD = bonding orbital; BD\* = antibonding orbital; HOMO = highest occupied molecular orbital; LUMO = lowest unoccupied molecular orbital; LP = lone particle, LV = lone valence; NBO = natural bond orbital; SOMO = singly occupied molecular orbital.

**Table S8.** Calculated percent contributions of natural bonding orbitals (NBOs) to the parent canonical molecular orbitals in the optimized structure of the  $[\text{U}(\text{dbCOT})_2(\text{THF})]^-$  anion in  $[\text{K}(\text{crypt-222})][\text{U}(\text{dbCOT})_2(\text{THF})]$ , **3**.

| Orbital Number | Orbital Label   | NBO Composition | % Contribution |
|----------------|-----------------|-----------------|----------------|
| 169            | $\alpha$ HOMO-3 | U (LV)          | 6.4            |
|                |                 | C (LP)          | 6.4            |
|                |                 | C-C (BD*)       | 46.7           |
| 171            | $\alpha$ HOMO-1 | U (LV)          | 6.9            |
|                |                 | C-C (BD)        | 40.9           |
| 172            | $\alpha$ HOMO   | U (LV)          | 13.2           |
|                |                 | C-C (BD)        | 32.3           |
| 173            | $\alpha$ SOMO 1 | U (LP)          | 89.3           |
| 174            | $\alpha$ SOMO 2 | U (LP)          | 88.5           |
| 175            | $\alpha$ SOMO 3 | U (LP)          | 87.8           |
| 176            | $\alpha$ LUMO   | U (LV)          | 10.6           |
|                |                 | C-C (BD*)       | 47.0           |
| 177            | $\alpha$ LUMO+1 | C-C (BD*)       | 60.0           |

BD = bonding orbital; BD\* = antibonding orbital; HOMO = highest occupied molecular orbital; LUMO = lowest unoccupied molecular orbital; LP = lone particle, LV = lone valence; NBO = natural bond orbital; SOMO = singly occupied molecular orbital.

**Table S9.** Calculated percent contributions of atomic orbitals to the natural bonding orbitals (NBOs) in the optimized structures of  $[\text{K}(\text{DME})_2][\text{U}(\text{dbCOT})_2]$ , **1**, as well as the  $[\text{U}(\text{dbCOT})_2]^-$  and  $[\text{U}(\text{dbCOT})_2(\text{THF})]^-$  anions in  $[\text{K}(\text{crypt-222})][\text{U}(\text{dbCOT})_2]$ , **2**, and  $[\text{K}(\text{crypt-222})][\text{U}(\text{dbCOT})_2(\text{THF})]$ , **3**, respectively.

|   | NBO      | Occupancy | % Composition                               |
|---|----------|-----------|---------------------------------------------|
| 1 | U (LP 1) | 0.98029   | s (0.04%), p (1.02%), d (0.35%), f (98.59%) |
|   | U (LP 2) | 0.96538   | s (0.00%), p (0.49%), d (0.08%), f (99.43%) |
|   | U (LP 3) | 0.89198   | s (0.06%), p (0.34%), d (0.04%), f (99.62%) |
| 2 | U (LP 1) | 0.95471   | s (0.09%), p (0.53%), d (0.58%), f (98.80%) |
|   | U (LP 2) | 0.94653   | s (0.01%), p (0.34%), d (0.13%), f (99.52%) |
|   | U (LP 3) | 0.93561   | s (0.00%), p (0.21%), d (0.20%), f (99.59%) |
| 3 | U (LP 1) | 0.97384   | s (0.60%), p (0.12%), d (2.32%), f (96.96%) |
|   | U (LP 2) | 0.94997   | s (0.00%), p (0.14%), d (0.28%), f (99.58%) |
|   | U (LP 3) | 0.94454   | s (0.06%), p (0.00%), d (0.51%), f (99.43%) |

LP = lone particle.
